# Supplementary material
Source: publisher figshare collection journal article supplement (https://gsajournals.figshare.com/ndownloader/files/20489358)
Supplement: Supplementary file 1 [file 20489358]

## Sheet: Normalized counts file on 24 da
	4-1_ShuR-1: Counts	4-2_ShuR-2: Counts	4-3_ShuR-3: Counts	4-4_ShuR-4: Counts	6-1_Shu:GSTS1R-1: Counts	6-2_Shu:GSTS1R-2: Counts	6-3_Shu:GSTS1R-3: Counts	6-4_Shu:GSTS1R-4: Counts	1-1_CSR-1: Counts	1-2_CSR-2: Counts	1-3_CSR-3: Counts	1-4_CSR-4: Counts	3-1_GSTS1R-1: Counts	3-2_GSTS1R-2: Counts	3-3_GSTS1R-3: Counts	3-4_GSTS1R-4: Counts
FBgn0085804	0	0	0	0	0	0	0	1.10682	0	0	0	0	0	0	0	0
FBgn0267431	10.3218	11.0466	13.9147	14.0295	16.8802	15.5234	19.6505	3.32045	9.48283	15.8604	18.1429	16.5252	12.0965	24.9984	4.01873	20.9633
FBgn0039987	0	0	0	0	0	0	0	0	0	0	0	0	0	0	0	0
FBgn0058182	0	0	0	0	0	0	0	0	0	0	0	0	0	0	0	0
FBgn0267430	2.29373	0	0	0	1.77686	1.72483	1.09169	1.10682	0.862076	1.66952	2.41905	2.54234	3.78017	0.83328	1.33958	0
FBgn0266747	0	0	0	0	0	0	0	0	0	0	0	0	0	0	0	0
FBgn0086917	0	0	0	0	0	0	0	0	0	1.66952	0	2.54234	0.756034	0.83328	0	0.998253
FBgn0010247	1500.1	1733.31	1352.94	1323.45	1419.71	1636.86	1490.16	1168.8	2023.29	1690.39	1428.45	1353.8	1202.09	1426.58	877.422	1165.96
FBgn0086378	1150.31	2068.72	860.572	881.518	1368.18	1258.26	900.648	718.324	1591.39	1376.52	971.247	854.226	1046.35	1439.07	726.05	791.614
FBgn0263977	3233.02	5906.9	2630.95	2539.33	3930.42	4096.46	2548.01	2432.78	4771.59	4422.55	2711.75	2788.95	2663.51	4097.24	2306.75	2376.84
FBgn0069923	1336.1	2926.34	374.627	274.744	1921.68	1794.68	433.403	301.054	2225.88	1980.88	381	366.097	1158.24	2557.34	312.121	421.263
FBgn0039955	2288	2121.95	2394.4	2275.11	2055.83	2241.41	2646.27	2222.49	2601.74	2258.86	2855.69	2610.98	2231.06	1961.54	2069.64	2408.78
FBgn0259821	147.946	115.487	139.147	125.096	120.827	130.224	146.287	98.5066	89.6559	119.37	113.695	138.558	138.354	118.326	141.995	95.8323
FBgn0027341	2270.8	1715.23	1867.78	1892.81	1984.75	1741.21	1596.06	1934.71	1508.63	1645.31	1773.16	1798.71	2348.24	2237.36	2029.46	2122.29
FBgn0085812	0	0	0	0	0.88843	0	0	0	0	0	0	0	0	0.83328	1.33958	0
FBgn0058198	920.934	1147.84	485.945	576.377	752.501	669.233	339.517	322.084	890.524	950.79	552.752	631.772	892.121	1238.25	436.702	543.05
FBgn0037213	1532.21	1047.42	1311.19	1165.61	1205.6	1220.31	1020.73	1054.8	1108.63	1440.79	1446.59	1274.98	1672.35	1396.58	1457.46	1225.85
FBgn0053294	32.1123	39.1651	23.548	30.3972	37.3141	19.8355	30.5674	28.7772	24.1381	36.7294	37.4952	27.9657	25.7052	24.9984	28.1311	21.9616
FBgn0000500	44.7278	79.3345	27.8294	28.0589	40.8678	47.4327	26.2007	27.6704	61.2074	33.3903	32.6571	26.6946	47.6302	55.8298	36.1685	27.9511
FBgn0037215	2211.16	2072.74	2592.42	2512.44	2174.88	2209.5	2447.58	2581.1	2475.88	2404.1	2575.08	2719.03	2508.52	2280.69	2818.47	2657.35
FBgn0037217	21.7905	21.0889	34.2516	33.9045	31.9835	19.8355	29.4758	17.7091	28.4485	27.547	21.7714	20.3387	36.2896	41.664	25.4519	27.9511
FBgn0037218	1463.4	910.84	1845.31	1773.56	1042.13	1137.52	1794.75	1804.11	1216.39	1170.33	1764.69	1822.86	1472.75	969.105	1817.8	1836.79
FBgn0051516	14.9093	10.0423	3.21109	7.01473	7.99587	7.76172	8.73356	4.42726	9.48283	7.51283	7.25714	7.62702	5.29224	9.16608	9.37703	8.98428
FBgn0261436	1306.28	1547.52	1017.91	1141.06	1687.13	1565.28	1275.1	1321.54	997.422	1182.02	713.619	1020.75	1157.49	1579.9	1034.15	1297.73
FBgn0037220	994.333	1107.67	996.508	1028.83	1095.43	1040.93	921.39	1031.55	1288.8	1239.62	1009.95	1077.95	956.383	1091.6	956.457	1078.11
FBgn0015331	347.501	256.08	350.009	368.273	294.07	275.972	342.792	365.249	340.52	333.069	327.781	376.266	334.167	294.148	338.913	346.394
FBgn0010225	6248.13	5576.51	5528.42	5291.45	5508.27	5231.4	5217.21	6225.84	5042.28	5512.75	5098.14	5464.76	7620.07	7012.05	5410.55	6442.72
FBgn0037222	80.2807	99.4191	70.6439	49.1031	31.0951	38.8086	27.2924	29.884	82.7593	126.883	91.9238	64.8297	100.553	83.328	52.2434	65.8847
FBgn0085334	18.3499	45.1905	8.5629	16.3677	18.657	18.9731	13.1003	8.85453	14.6553	11.6866	15.7238	8.89819	9.07241	20.832	9.37703	26.9528
FBgn0037223	1.14687	2.00847	1.07036	2.33824	3.55372	2.58724	1.09169	2.21363	0	1.66952	0	1.27117	2.2681	4.99968	2.67915	2.99476
FBgn0037224	0	0	0	1.16912	0.88843	1.72483	0	0	0.862076	0	0	1.27117	0.756034	0.83328	0	0.998253
FBgn0037225	57.3433	52.2201	50.307	46.7649	35.5372	42.2582	33.8425	36.5249	56.897	73.4588	79.8286	57.2027	58.9707	58.3296	44.206	49.9126
FBgn0250821	1.14687	2.00847	1.07036	0	0.88843	7.76172	3.27508	3.32045	0	0	0	1.27117	4.53621	3.33312	2.67915	1.99651
FBgn0037227	0	0	0	0	4.44215	0.862413	1.09169	3.32045	0.862076	0.834759	0	2.54234	0.756034	0.83328	2.67915	0
FBgn0041621	1.14687	2.00847	1.07036	1.16912	1.77686	1.72483	3.27508	1.10682	0.862076	2.50428	0	0	2.2681	2.49984	0	0.998253
FBgn0037228	278.689	264.113	295.42	312.156	224.773	223.365	229.256	479.251	177.588	227.054	301.171	235.166	343.24	367.477	270.594	333.416
FBgn0037229	104.365	80.3387	77.0661	65.4708	97.7273	79.342	88.4273	125.07	48.2762	56.7636	44.7524	45.7621	77.1155	109.993	48.2247	86.848
FBgn0267157	9.17493	4.01693	6.42218	2.33824	5.33058	4.31207	10.9169	2.21363	3.4483	5.00855	15.7238	7.62702	6.80431	6.66624	9.37703	5.98952
FBgn0041605	8151.93	5252.14	4515.86	4036.98	5781.02	6218	4092.76	3536.28	5325.04	5585.37	4412.34	3541.48	7092.36	6705.41	3732.06	3890.19
FBgn0037230	979.424	491.07	1133.51	1054.55	684.98	770.997	1143	1283.91	556.901	691.18	1042.61	971.174	1343.47	919.108	1180.17	1483.4
FBgn0262214	0	0	0	1.16912	0	0	0	0	0	0	0	0	0	0	0	0
FBgn0027930	1102.14	855.607	779.224	777.466	844.009	911.571	736.894	936.366	829.317	848.115	656.771	756.346	1231.58	1098.26	713.994	858.497
FBgn0037231	988.599	1468.19	702.158	673.414	1453.47	1384.17	810.037	740.46	1406.91	1252.14	708.781	622.873	922.362	1349.91	722.031	702.77
FBgn0037232	465.628	364.537	439.919	451.281	315.393	388.086	433.403	464.863	370.693	349.764	447.524	447.452	406.746	331.646	411.25	404.292
FBgn0261086	58.4902	41.1736	53.5181	50.2722	33.7604	62.0937	66.5934	45.3795	41.3796	43.4074	56.8476	58.4738	52.1664	41.664	83.0537	36.9354
FBgn0037234	897.997	802.383	916.23	862.812	850.228	776.172	975.975	943.007	897.421	846.445	948.266	988.97	913.29	764.118	790.349	932.368
FBgn0027866	1278.76	1041.39	1522.06	1464.91	1194.94	1217.73	1594.97	1541.79	1195.7	1259.65	1682.45	1615.66	1326.84	1105.76	1492.29	1588.22
FBgn0037236	747.757	699.951	1176.33	1281.36	630.786	764.96	1356.98	1277.27	799.144	859.801	1226.46	1421.17	697.064	529.133	1184.18	1164.96
FBgn0040687	10056.9	16214.4	6248.78	5998.76	12096.9	11494.2	6090.56	4694.01	13119.1	13084.8	7704.66	6100.35	9788.38	15104	7362.31	6163.21
FBgn0037235	704.176	977.119	715.002	828.907	849.339	796.87	745.627	781.412	1013.8	929.921	745.067	855.497	682.699	774.117	687.202	769.653
FBgn0261434	4.58747	1.00423	1.07036	0	1.77686	0.862413	1.09169	0	1.72415	1.66952	3.62857	2.54234	0.756034	2.49984	1.33958	1.99651
FBgn0037238	448.425	244.029	437.778	391.656	337.604	307.019	313.316	347.54	322.416	312.2	417.286	400.419	438.5	359.977	400.533	363.364
FBgn0266227	157.121	156.66	139.147	91.1915	43.5331	82.7917	54.5847	35.4181	188.795	161.108	168.124	129.659	195.057	161.656	109.845	105.815
FBgn0037239	2095.33	2235.42	2093.63	2051.81	2124.24	2128.44	2109.15	2326.53	1783.63	1867.36	1695.75	1997.01	2163.77	2195.69	1957.12	2198.15
FBgn0037240	1894.62	1199.05	1957.69	1814.48	1674.69	1623.06	2067.67	1880.48	1550.01	1550.15	2046.51	2014.8	1992.91	1547.4	1795.03	1967.56
FBgn0003882	801.66	590.489	863.783	908.408	743.616	745.125	906.106	1026.02	765.523	748.778	880.533	1052.53	784.764	628.293	851.97	948.34
FBgn0037241	329.151	338.427	348.938	354.244	319.835	311.331	399.56	328.724	300.002	320.547	321.733	341.945	364.409	276.649	308.102	365.361
FBgn0086608	121.568	184.779	96.3326	74.8238	115.496	94.8654	63.3183	67.5158	175.863	160.274	82.2476	86.4396	132.306	177.489	76.3558	83.8532
FBgn0267661	57.3433	97.4107	48.1663	51.4414	68.4091	63.8186	27.2924	42.059	87.0697	75.963	50.8	40.6774	65.019	74.1619	34.829	50.9109
FBgn0037242	707.617	709.993	708.58	757.591	771.158	724.427	829.688	841.18	740.523	716.223	735.39	734.736	703.868	744.952	789.01	859.496
FBgn0086605	725.967	944.984	751.395	761.098	810.249	807.219	768.553	865.53	848.283	828.915	787.4	733.465	741.67	772.451	701.938	847.517
FBgn0037244	658.301	1021.31	574.785	585.73	823.575	737.363	533.839	552.301	988.801	913.226	587.828	589.823	607.096	772.451	594.771	601.946
FBgn0266697	9.17493	10.0423	2.14073	1.16912	11.5496	8.62413	6.55017	4.42726	8.62076	9.18234	0	2.54234	4.53621	9.99936	9.37703	2.99476
FBgn0263594	18583.8	18010.9	16284.5	16121	17839.7	19839.8	17039.2	17239.8	21572.6	19906.5	17013.2	17682	15819.3	12937.5	15255.1	13667.1
FBgn0052944	118.127	72.3048	85.629	84.1768	92.3968	100.902	86.2439	88.5453	86.2076	85.9801	94.3428	69.9144	108.113	104.16	97.789	67.8812
FBgn0051528	1.14687	3.0127	0	1.16912	5.33058	0	2.18339	3.32045	0.862076	0.834759	0	1.27117	1.51207	0.83328	0	0
FBgn0037248	2051.74	1501.33	2564.59	2472.69	1869.26	1904.21	3009.8	2515.79	2200.02	1839.81	2836.33	2822	1934.69	1199.92	2271.92	2482.65
FBgn0051525	0	0	0	0	2.66529	0	0	0	0	0	0	0	0	0.83328	0	0
FBgn0037249	5612.77	3920.53	7872.52	8353.38	5375	5446.14	7936.62	8819.11	4982.8	5338.28	7783.28	8678.28	5957.55	3881.42	7761.5	7553.78
FBgn0037250	565.405	598.523	607.966	604.436	588.141	578.679	586.24	647.487	646.557	565.966	590.247	627.958	531.492	465.804	632.28	573.995
FBgn0037251	248.87	459.939	259.028	254.869	349.153	281.147	257.64	252.354	334.485	361.45	250.371	205.93	226.81	333.312	277.292	260.544
FBgn0264983	1.14687	4.01693	0	0	2.66529	4.31207	0	0	7.75868	4.17379	0	0	0	1.66656	0	0
FBgn0037252	1050.53	612.583	1113.18	1095.47	864.443	901.222	1163.75	1156.62	911.214	977.502	1143	1156.76	999.477	791.616	1129.26	1146.99
FBgn0051522	4053.03	3048.85	3138.3	3031.53	3436.45	3539.34	3195.39	2923.1	3362.1	3374.09	3347.96	2937.67	4228.5	4187.23	3379.75	3389.07
FBgn0263620	29.8185	27.1143	27.8294	26.8898	27.5413	28.4596	16.3754	16.6022	29.3106	31.7208	18.1429	16.5252	30.2414	29.1648	32.1498	27.9511
FBgn0051523	11249.6	8334.13	8768.41	8432.88	9235.23	9242.48	8187.71	7322.7	8997.49	9667.34	9869.71	8614.72	11565.8	10958.5	9399.8	8791.61
FBgn0037254	0	0	0	0	0	0	3.27508	2.21363	0.862076	0	2.41905	2.54234	0.756034	0.83328	1.33958	1.99651
FBgn0037255	703.029	968.081	652.921	633.664	883.988	930.544	791.478	730.499	975.008	882.34	751.114	749.99	647.165	764.118	687.202	728.725
FBgn0085386	147.946	93.3937	135.936	140.295	119.938	118.151	129.912	162.702	96.5525	106.014	124.581	104.236	159.523	124.992	150.032	147.741
FBgn0085454	1.14687	0	0	0	0	0.862413	1.09169	1.10682	0	0	0	1.27117	0	0	0	0
FBgn0051526	0	0	0	0	0	0	0	0	0	0	0	0	0	0	0	0
FBgn0037260	0	1.00423	0	0	0	0	0	0	0.862076	0	4.83809	1.27117	0	0.83328	0	0
FBgn0052945	0	0	0	0	0	0	0	0	0	0	0	0	0	0	0	0
FBgn0267118	0	2.00847	0	1.16912	0.88843	0.862413	0	2.21363	0	2.50428	2.41905	0	3.02414	3.33312	4.01873	0
FBgn0265376	18.3499	15.0635	6.42218	1.16912	17.7686	15.5234	13.1003	15.4954	12.0691	21.7037	8.46666	3.81351	13.6086	13.3325	6.69788	5.98952
FBgn0087012	259.192	181.766	207.65	250.192	266.529	232.852	236.898	195.906	230.174	251.262	238.276	203.387	291.073	244.984	235.765	217.619
FBgn0267233	2.29373	0	0	0	0	0	1.09169	2.21363	1.72415	0.834759	0	0	0	0.83328	0	1.99651
FBgn0037261	2424.48	3303.93	2130.02	2085.71	3015.33	2888.22	2093.87	2014.41	2731.06	2966.73	1967.89	1848.28	2408.73	3053.14	2009.36	2095.33
FBgn0037262	557.377	665.807	409.949	487.524	620.124	655.434	531.655	493.64	738.799	722.066	520.095	514.824	511.835	595.795	478.228	484.153
FBgn0037263	55.0496	83.3514	57.7996	43.2575	67.5207	74.1675	80.7854	73.0499	101.725	81.8063	60.4762	44.491	44.606	54.9965	41.5268	40.9284
FBgn0040466	244.283	309.304	113.458	147.309	282.521	300.12	150.654	152.741	233.623	237.906	106.438	102.965	182.96	237.485	113.864	141.752
FBgn0022981	1701.95	2024.53	1922.37	1915.02	1836.39	1900.76	1982.52	1893.76	2854.33	2342.33	2219.48	2401.24	1481.83	1481.57	1607.49	1811.83
FBgn0265038	1.14687	2.00847	0	0	1.77686	2.58724	0	2.21363	1.72415	1.66952	1.20952	1.27117	0.756034	0	0	0
FBgn0087013	11379.2	6928.21	14948.7	15189.2	8807.01	9587.45	14044.6	15709	9896.63	10028.8	16972	16862.1	11920.4	7325.37	15732	13588.2
FBgn0037265	420.9	453.914	411.019	445.435	504.628	461.391	408.294	430.551	345.692	279.644	258.838	272.03	340.972	370.81	322.838	352.383
FBgn0263346	4384.47	2102.87	4413.11	4357.32	5257.73	5360.76	7209.55	7256.29	2794.85	3014.31	3929.74	4159.27	5626.41	4780.53	5224.34	5392.56
FBgn0265039	0	0	0	0	0	0	0	0	0	0	0	0	0	0	0	0
FBgn0265040	0	0	0	0	0	0	1.09169	2.21363	0	0	1.20952	0	0	0.83328	1.33958	0
FBgn0053927	0	1.00423	0	0	0	0.862413	0	0	0	0	0	0	0	0	0	0
FBgn0037270	3908.52	6451.2	3593.21	3595.05	5101.37	4963.19	3315.48	3547.35	5826.77	5573.68	3556	3688.94	4137.78	4403.05	4045.52	3362.12
FBgn0266228	2.29373	4.01693	1.07036	0	0	3.44965	1.09169	1.10682	2.58623	2.50428	0	0	5.29224	1.66656	1.33958	1.99651
FBgn0027570	1221.41	981.136	1101.4	1192.5	1148.74	905.534	1288.2	1149.98	1242.25	1127.76	1210.73	1342.36	1233.09	1270.75	1228.39	1513.35
FBgn0026620	3836.27	2869.1	3897.19	3904.87	3259.65	3209.9	4313.28	3939.16	3169.85	2927.5	3608.01	3535.12	3511.78	2881.48	3126.57	3724.48
FBgn0010750	791.338	1030.34	814.546	806.694	955.063	946.93	866.805	790.267	1150.87	952.46	815.219	866.938	759.815	803.282	838.574	823.559
FBgn0264907	767.254	469.981	715.002	800.849	458.43	544.183	543.664	581.078	543.97	560.123	726.924	741.092	704.624	630.793	677.825	755.677
FBgn0264897	0	1.00423	0	0	0	0.862413	0	0	0	0	0	0	0	0	0	0
FBgn0037275	376.172	278.173	373.557	365.935	351.818	337.204	417.027	425.017	257.761	308.026	373.743	345.758	446.816	438.305	434.022	386.324
FBgn0037276	9.17493	3.0127	2.14073	5.84561	2.66529	3.44965	2.18339	1.10682	0.862076	1.66952	2.41905	5.08468	6.80431	0.83328	2.67915	5.98952
FBgn0260794	4675.78	2166.13	8536.14	8437.55	3033.99	3506.57	8553.43	9151.16	3624.17	3816.52	8817.43	10086.7	5370.87	2821.49	7764.18	9124.03
FBgn0026417	92.8962	120.508	92.0512	104.052	64.8554	81.9292	66.5934	71.9431	118.966	131.057	131.838	143.642	59.7267	59.1629	72.3371	63.8882
FBgn0037279	721.379	847.573	691.454	703.811	716.075	718.39	622.266	613.176	927.594	964.146	775.305	803.379	818.029	885.777	630.94	695.782
FBgn0037280	14.9093	20.0847	8.5629	7.01473	19.5455	14.661	13.1003	12.175	6.03453	15.0257	9.67619	13.9829	12.0965	10.8326	10.7166	11.979
FBgn0037282	652.567	570.405	601.544	696.797	562.376	592.478	603.707	575.544	762.937	672.815	712.409	727.109	659.262	540.799	592.092	550.037
FBgn0037283	0	0	0	0	0	0	0	0	0	0	0	0	0	0	0	0
FBgn0037284	0	0	0	0	0	0	0	0	0	0	0	0	0	0	0	0
FBgn0003002	24.0842	16.0677	13.9147	11.6912	25.7645	14.661	18.5588	7.74771	8.62076	14.1909	18.1429	29.2369	18.1448	14.1658	17.4145	18.9668
FBgn0020280	0	0	0	0	0	0	0	0	0	0	0	0	0.756034	0	0	0.998253
FBgn0267140	0	0	0	0	0.88843	0	1.09169	0	0	0	0	0	0	0	0	0
FBgn0004913	1287.93	1200.06	1747.9	1627.42	1368.18	1335.02	2144.09	1806.32	1703.46	1343.13	1849.36	1783.45	1327.6	1092.43	1642.32	1867.73
FBgn0265082	1646.9	845.565	1648.36	1756.02	1202.05	1223.76	1676.84	1790.83	1126.73	1116.07	1761.07	1680.49	1823.55	1284.92	1761.54	1679.06
FBgn0266698	0	1.00423	0	0	0	0	0	1.10682	0	0	0	0	1.51207	0.83328	2.67915	0
FBgn0004183	0	14.0593	1.07036	3.50737	6.21901	1.72483	4.36678	0	13.7932	1.66952	0	1.27117	0	2.49984	0	0.998253
FBgn0004436	2926.8	2569.83	2823.62	2724.05	2770.13	2780.42	2956.31	2739.37	2932.78	2618.64	3268.13	2852.51	3108.06	2983.98	2723.36	2853.01
FBgn0037288	4721.65	5650.82	3723.79	3963.32	3973.95	3848.09	3289.28	3208.66	4344.86	4961.81	3634.62	4226.64	4376.68	6887.89	3891.47	4906.41
FBgn0250839	231.667	218.923	262.239	229.148	213.223	221.64	222.706	203.654	162.07	197.838	227.39	208.472	205.641	266.65	218.351	280.509
FBgn0037290	725.967	1015.28	646.499	640.679	824.463	830.504	705.235	606.535	698.281	693.684	632.581	584.738	686.479	1031.6	578.697	718.742
FBgn0037291	36.6997	26.1101	27.8294	35.0737	22.2108	19.8355	39.301	25.4568	16.3794	33.3903	38.7048	29.2369	43.094	64.9959	40.1873	30.9458
FBgn0263455	0	1.00423	0	0	0.88843	2.58724	0	1.10682	0	0	0	0	0	0.83328	0	0
FBgn0263343	5.73433	9.0381	6.42218	1.16912	1.77686	6.03689	4.36678	2.21363	2.58623	7.51283	6.04762	10.1694	8.31638	10.8326	5.3583	1.99651
FBgn0037292	1188.15	1552.55	1279.08	1256.81	505.517	668.37	582.965	480.358	1240.53	1357.32	1317.17	1184.73	1009.31	1082.43	1111.85	860.494	plh
FBgn0267145	9.17493	10.0423	10.7036	2.33824	12.438	13.7986	13.1003	7.74771	9.48283	11.6866	6.04762	6.35585	9.07241	8.3328	6.69788	3.99301
FBgn0263626	2.29373	0	2.14073	1.16912	3.55372	1.72483	1.09169	1.10682	0	0.834759	2.41905	0	3.02414	2.49984	5.3583	1.99651
FBgn0267148	1.14687	2.00847	2.14073	1.16912	0	1.72483	1.09169	2.21363	2.58623	0	0	1.27117	1.51207	2.49984	1.33958	0
FBgn0010313	1119.34	893.768	1371.13	1411.13	1120.31	1172.88	1417.02	1343.67	1296.56	1219.58	1544.56	1414.81	1332.89	909.942	1450.76	1401.55
FBgn0262605	2.29373	7.02964	2.14073	2.33824	8.8843	13.7986	4.36678	0	2.58623	5.00855	3.62857	3.81351	1.51207	2.49984	1.33958	2.99476
FBgn0037293	483.978	504.125	482.734	512.075	519.732	541.595	541.48	532.379	520.694	511.707	541.867	480.502	551.905	536.632	522.434	494.135
FBgn0040684	0	1.00423	0	0	0	0	0	0	0	1.66952	0	0	0.756034	0.83328	0	0
FBgn0037295	35.5529	29.1228	26.7591	25.7207	32.8719	40.5334	33.8425	39.8454	25.8623	33.3903	26.6095	26.6946	43.85	34.9978	30.8102	27.9511
FBgn0037294	1.14687	0	1.07036	1.16912	0	1.72483	0	0	2.58623	0.834759	0	1.27117	0	1.66656	2.67915	2.99476
FBgn0259212	2406.13	1299.48	3633.88	3392.79	1800.85	1893	3788.18	3604.9	2076.74	2096.91	3920.07	3871.98	2683.17	1829.88	3291.34	3514.85
FBgn0263018	0	0	0	0	0	0	0	0	0	0	0	0	0	0	1.33958	0
FBgn0037296	0	9.0381	0	4.67649	1.77686	0.862413	2.18339	1.10682	0.862076	3.33903	1.20952	1.27117	2.2681	0	2.67915	2.99476
FBgn0037297	344.06	458.935	423.864	372.95	415.785	416.546	388.643	365.249	453.452	427.396	391.886	371.182	339.459	403.308	411.25	378.338
FBgn0037298	2473.79	2921.32	2189.96	2286.8	2855.42	2676.93	2361.34	2535.72	2675.88	2626.15	2188.03	2297	2284.74	2514.01	2326.84	2562.51
FBgn0040682	2.29373	1.00423	2.14073	0	5.33058	2.58724	0	2.21363	0.862076	0.834759	1.20952	1.27117	0	0.83328	0	0
FBgn0037299	622.749	1025.32	506.282	503.892	835.125	777.897	496.721	472.61	852.593	873.992	517.676	572.027	633.557	948.273	507.699	513.102
FBgn0040208	1172.1	1158.89	1041.46	1049.87	1322.87	1307.42	1113.53	1055.9	1442.25	1451.65	1121.23	1074.14	1206.63	1121.6	957.796	1066.13
FBgn0037301	571.14	334.41	865.923	865.15	449.546	427.757	912.657	1044.83	381.038	420.718	835.781	851.684	533.76	365.81	719.352	873.471
FBgn0087005	1065.44	1067.5	893.753	820.724	1193.16	1181.51	877.722	811.296	837.076	911.556	776.514	783.041	1090.96	1130.76	1101.13	834.539
FBgn0260462	6072.66	5573.5	5682.56	5673.75	6297.19	6475.86	5863.49	6969.62	5831.08	5405.06	5410.2	5546.11	6084.56	5772.13	5859.3	5595.21
FBgn0053293	17.203	7.02964	23.548	33.9045	13.3265	14.661	13.1003	19.9227	12.0691	9.18234	21.7714	13.9829	17.3888	16.6656	21.4332	12.9773
FBgn0264789	9.17493	7.02964	11.774	3.50737	10.6612	16.3858	9.82525	11.0682	8.62076	9.18234	7.25714	5.08468	11.3405	12.4992	2.67915	0.998253
FBgn0037304	32.1123	16.0677	19.2665	15.1986	19.5455	30.1845	22.9256	29.884	12.9311	10.8519	8.46666	16.5252	15.8767	14.999	14.7353	16.9703
FBgn0037305	549.349	717.023	587.629	550.656	582.81	576.954	605.89	574.438	696.557	699.528	621.695	582.196	565.514	577.463	573.338	639.88
FBgn0264785	1635.43	1538.49	1763.96	1731.47	1540.54	1560.97	1757.63	1586.07	2045.71	1989.23	2189.24	2150.82	1822.8	1484.91	1900.86	1647.12
FBgn0037307	18.3499	17.072	18.1962	15.1986	12.438	21.5603	9.82525	13.2818	12.0691	23.3732	19.3524	13.9829	20.4129	25.8317	24.1124	9.98253
FBgn0267443	10.3218	39.1651	11.774	7.01473	22.2108	21.5603	10.9169	5.53408	34.483	20.869	8.46666	13.9829	11.3405	25.8317	12.0562	7.98602
FBgn0266393	0	0	0	0	0	0	0	0	0	0	0	0	0	0	0	0
FBgn0013576	6180.46	4551.19	5911.61	5656.21	5413.21	5489.26	6372.22	5734.41	4785.38	5151.3	6192.76	5710.1	5977.21	5894.62	6008	6044.42
FBgn0051538	44.7278	13.055	77.0661	79.5003	21.3223	34.4965	72.0518	54.234	24.1381	27.547	73.7809	66.1008	51.4103	34.9978	83.0537	48.9144
FBgn0037310	0	2.00847	0	1.16912	0.88843	2.58724	4.36678	1.10682	0	0	0	0	0	0	2.67915	0
FBgn0037312	438.103	970.09	391.753	466.48	681.426	610.588	417.027	452.688	868.11	728.744	408.819	451.265	492.178	692.456	399.193	446.219
FBgn0037313	1188.15	2085.79	1087.49	1076.76	1691.57	1489.39	1091.69	1166.58	1500.01	1569.35	1030.51	1043.63	1195.29	1647.39	1077.02	1110.06
FBgn0250746	3151.59	5258.17	2972.4	3028.03	4547.88	4650.13	3910.45	3734.4	4286.24	4045.24	2492.83	2833.44	3255.48	4901.35	3269.9	3316.2
FBgn0037315	1083.79	985.153	1403.25	1405.28	1036.8	1046.97	1337.33	1324.86	1207.77	1117.74	1457.48	1573.71	1218.73	1017.44	1458.8	1403.54
FBgn0264912	0	1.00423	0	0	1.77686	0	1.09169	0	0	0	0	0	0.756034	0	0	0.998253
FBgn0085306	0	0	0	0	0	0	0	0	0	0	0	0	0	0	0	0
FBgn0051542	0	0	0	0	0	0	0	0	0	0	0	0	0	0	0	0
FBgn0003275	583.755	1276.38	384.26	377.626	898.203	825.329	377.726	420.59	980.18	969.155	396.724	396.605	483.106	742.453	359.006	364.362
FBgn0086695	309.654	382.613	324.32	340.214	396.24	369.113	445.411	388.492	456.038	373.137	373.743	361.012	293.341	301.647	367.044	407.287
FBgn0037317	241.989	280.181	175.539	154.324	272.748	263.036	171.396	184.838	233.623	237.906	160.867	169.066	186.74	206.653	176.824	176.691
FBgn0041707	551.643	848.577	449.552	484.016	645.889	585.578	455.237	417.27	597.419	592.679	449.943	383.893	581.39	715.788	518.416	436.236
FBgn0001311	1388.86	801.378	1333.67	1155.09	1205.6	1117.69	1072.04	1175.44	763.799	918.234	937.381	1055.07	1362.37	1238.25	894.836	1187.92
FBgn0037320	2.29373	0	2.14073	1.16912	0	3.44965	1.09169	1.10682	2.58623	0	1.20952	1.27117	0	0.83328	2.67915	0.998253
FBgn0011965	0	0	0	0	0	0	0	0	0	0	0	0	0	0.83328	0	0
FBgn0264712	653.714	707.985	634.725	650.032	716.075	758.061	673.575	648.594	888.8	768.813	685.8	688.974	606.34	647.459	570.659	651.859
FBgn0037322	0	0	0	0	0	0	0	0	0	0.834759	0	0	0	0	0	0
FBgn0037323	19.4967	23.0974	10.7036	7.01473	24.8761	30.1845	18.5588	13.2818	10.3449	14.1909	13.3048	15.254	17.3888	21.6653	20.0936	16.9703
FBgn0037324	133.037	121.512	113.458	73.6547	103.058	138.849	118.995	90.7589	86.2076	100.171	119.743	105.507	127.014	128.325	172.805	106.813
FBgn0037326	212.17	132.559	169.117	146.14	200.785	194.905	135.37	136.138	121.553	131.892	157.238	122.032	195.057	192.488	172.805	151.734
FBgn0037325	0	0	0	0	0	0	0	0	0.862076	0	0	0	0.756034	0	0	0
FBgn0037327	1183.57	568.396	1586.28	1598.19	841.344	904.671	1756.54	1796.36	1031.9	1005.05	1686.08	1857.18	1244.43	825.781	1460.14	1944.6
FBgn0037328	7887	9431.76	11515	12752.8	9701.66	9339.93	11287	13124.6	9890.6	9626.44	10623.2	12376.1	9535.86	7222.87	13981.1	11505.9
FBgn0037329	984.012	936.95	1016.84	972.709	973.72	1001.26	886.456	1004.99	961.215	1088.53	1046.24	1019.48	1044.08	1035.77	1206.96	1009.23
FBgn0037330	582.608	631.663	697.876	657.047	522.397	533.834	661.567	765.917	609.488	566.801	725.714	769.058	529.98	524.967	696.579	716.746
FBgn0011715	680.092	1046.41	769.591	789.157	845.786	815.843	863.53	732.712	1093.97	864.81	780.143	752.533	652.458	747.452	825.178	814.574
FBgn0025825	0	0	0	0	0	0	0	0	0	0	0	0	0	0	0	0
FBgn0266539	0	0	0	0	0	0	0	0	0	0	0	0	0	0	0	0
FBgn0037332	778.722	552.328	880.908	849.952	794.257	814.98	983.617	934.153	752.592	782.169	986.971	929.225	802.909	714.954	924.307	886.448
FBgn0015402	681.239	392.655	831.672	809.032	533.058	518.31	762.003	867.744	495.694	497.516	863.6	889.819	658.506	451.638	873.403	756.676
FBgn0051550	1367.07	1334.63	1261.96	1330.46	1542.32	1556.66	1163.75	1347	1495.7	1667.01	1382.49	1299.14	1511.31	1419.91	1395.84	1303.72
FBgn0051547	1023.01	503.121	734.269	825.4	867.108	647.672	791.478	898.735	593.97	749.613	833.362	958.462	1146.9	752.452	952.438	997.255
FBgn0010399	196.114	141.597	144.499	194.074	170.579	161.271	161.571	149.42	118.966	179.473	166.914	177.964	183.716	183.322	170.126	134.764
FBgn0010051	1965.73	830.501	2415.81	2321.88	1392.17	1501.46	2324.22	2516.9	1304.32	1456.65	2347.69	2450.82	2098	1435.74	2104.47	2397.8
FBgn0264427	1.14687	2.00847	1.07036	2.33824	1.77686	4.31207	3.27508	4.42726	2.58623	1.66952	6.04762	0	4.53621	1.66656	1.33958	0.998253
FBgn0037336	1808.61	1080.56	2015.49	2017.9	1554.75	1554.93	2080.77	1934.71	1630.19	1534.29	2256.97	2077.09	1881.01	1402.41	1967.84	1819.81
FBgn0014342	88.3087	90.381	80.2772	75.9929	72.8513	84.5165	78.602	90.7589	100.863	99.3363	111.276	109.321	96.7724	83.328	87.0724	107.811
FBgn0086768	909.465	1469.19	983.663	936.467	1136.3	1055.59	911.565	1007.2	1128.46	1150.3	822.476	818.634	979.065	1141.59	992.625	958.323
FBgn0037338	324.563	297.253	408.879	429.068	358.037	372.562	534.93	468.183	390.52	362.285	482.6	452.537	330.387	263.317	384.458	505.116
FBgn0037339	1154.89	863.641	1256.61	1309.42	1161.18	1190.13	1483.61	1596.03	999.146	993.363	1299.03	1238.12	1267.11	1067.43	1259.2	1441.48
FBgn0263484	1.14687	0	1.07036	1.16912	0	3.44965	1.09169	0	0.862076	0.834759	0	0	0.756034	0	0	0.998253
FBgn0037340	301.626	533.248	235.48	301.633	350.042	329.442	241.264	264.529	350.003	343.921	274.562	254.234	252.515	403.308	340.252	354.38
FBgn0037341	1215.68	1230.19	1013.63	980.893	1218.93	1159.95	921.39	997.241	1074.15	1213.74	990.6	953.378	1128	1311.58	1146.68	1111.06
FBgn0037342	342.913	537.265	287.928	315.663	453.988	401.884	335.15	339.793	411.21	409.866	289.076	322.877	315.266	362.477	288.009	350.387
FBgn0041191	2089.59	2496.52	1634.44	1461.4	2240.62	2164.66	1613.52	1530.73	2334.5	2288.07	1776.79	1543.2	1974.76	2315.69	1729.39	1627.15
FBgn0023023	1096.4	1025.32	737.48	764.606	949.732	918.47	659.383	693.974	843.11	1052.63	728.133	818.634	990.405	1051.6	774.275	754.679
FBgn0037344	1972.61	932.933	2762.61	2752.11	1363.74	1420.39	2913.73	3001.69	1381.91	1377.35	2796.42	3113.1	1918.82	1150.76	2550.55	2952.83
FBgn0037345	72.2526	146.618	59.9403	60.7943	84.4009	86.2413	76.4186	83.0112	86.2076	118.536	95.5524	72.4567	60.4827	104.16	50.9039	50.9109
FBgn0014366	549.349	454.918	611.177	636.002	501.963	514.861	647.375	637.526	500.866	488.334	562.428	569.484	459.669	389.975	549.226	551.036
FBgn0015324	13615.6	11147	12827.2	12752.8	11750.4	11985.8	11255.4	11970.2	11670.8	11711.7	11713	11837.1	13003	12212.6	11888.7	11971
FBgn0250753	16604.3	16460.4	17511.1	17547.4	15647.9	16494.5	17174.5	16731.7	17653.6	16668.5	16350.3	17779.9	14122.7	13723.3	13256.4	15236.3
FBgn0082961	9.17493	12.0508	14.9851	19.8751	8.8843	12.0738	12.0086	9.96135	18.1036	14.1909	16.9333	10.1694	12.0965	10.8326	8.03745	9.98253
FBgn0082962	4.58747	7.02964	5.35181	10.5221	3.55372	6.03689	6.55017	4.42726	2.58623	2.50428	15.7238	19.0676	3.78017	0	6.69788	1.99651
FBgn0082978	5.73433	4.01693	0	4.67649	2.66529	4.31207	3.27508	6.6409	12.0691	5.00855	6.04762	2.54234	6.04827	2.49984	1.33958	3.99301
FBgn0082979	3.4406	5.02117	4.28145	11.6912	1.77686	1.72483	4.36678	2.21363	7.75868	3.33903	3.62857	6.35585	3.02414	4.1664	2.67915	5.98952
FBgn0082954	8.02807	5.02117	2.14073	3.50737	0.88843	8.62413	3.27508	1.10682	4.31038	3.33903	3.62857	3.81351	6.80431	3.33312	4.01873	6.98777
FBgn0086662	20.6436	12.0508	11.774	7.01473	12.438	11.2114	8.73356	8.85453	19.8277	11.6866	18.1429	19.0676	11.3405	9.16608	17.4145	14.9738
FBgn0082988	9.17493	4.01693	7.49254	3.50737	6.21901	5.17448	10.9169	1.10682	8.62076	5.84331	4.83809	1.27117	9.07241	1.66656	2.67915	4.99126
FBgn0082989	12.6155	3.0127	1.07036	3.50737	7.10744	9.48654	1.09169	2.21363	10.3449	2.50428	3.62857	0	9.82845	4.1664	0	0.998253
FBgn0037347	742.023	838.535	667.906	637.171	708.079	674.407	588.423	617.603	774.144	811.385	771.676	762.702	635.069	644.959	709.975	642.875
FBgn0261004	522.971	409.727	626.162	840.599	469.98	473.465	803.487	758.169	612.936	535.08	852.714	917.785	528.468	352.478	730.069	823.559
FBgn0017550	1972.61	1657.99	2541.04	2484.38	2014.96	1975.79	2621.16	2526.86	2269.85	2113.61	2696.03	2743.18	2243.91	1695.73	2476.87	2539.56
FBgn0263619	58.4902	66.2794	58.8699	40.9193	27.5413	39.671	37.1176	26.5636	99.1387	79.3021	85.8762	82.6261	65.775	73.3287	61.6205	49.9126
FBgn0019637	823.45	810.417	891.612	999.599	972.831	885.698	951.958	929.726	1036.22	1000.04	893.838	1004.22	774.179	753.285	888.138	1007.24
FBgn0044823	307.36	477.011	276.154	279.42	391.798	404.472	350.434	324.297	487.073	404.023	309.638	316.521	367.433	409.141	296.046	362.366
FBgn0037350	133.037	140.593	96.3326	97.0371	127.046	143.161	117.903	125.07	117.242	135.231	96.7619	116.948	115.673	119.992	107.166	89.8428
FBgn0037351	19043.7	34773.6	16449.3	18057.1	31223.9	28086.2	16403.8	17709.1	31566.6	33851.1	15698.4	17970.5	22107.2	24295.1	21318	16160.7
FBgn0260002	1.14687	3.0127	1.07036	2.33824	0.88843	1.72483	3.27508	0	0.862076	0.834759	1.20952	5.08468	0.756034	0	2.67915	1.99651
FBgn0086051	0	0	0	0	0	0	0	0	0	0	0	0	0	0	0	0
FBgn0051551	3.4406	2.00847	2.14073	3.50737	0.88843	2.58724	1.09169	0	0.862076	0.834759	3.62857	0	3.78017	0	1.33958	2.99476
FBgn0051549	925.521	1741.34	861.642	870.996	1342.42	1187.54	885.364	896.521	1495.7	1397.39	816.428	888.548	854.319	1202.42	872.064	944.347
FBgn0037354	1082.64	1470.2	1115.32	1198.35	1217.15	1178.92	923.574	1083.57	1112.08	1206.23	955.524	1056.34	979.821	1349.91	1068.98	1306.71
FBgn0051546	3.4406	2.00847	0	0	4.44215	0	2.18339	1.10682	0.862076	4.17379	0	3.81351	3.78017	0.83328	1.33958	2.99476
FBgn0051548	1504.69	2235.42	1217	1386.58	1761.76	1713.61	1244.53	1527.41	1475.87	1693.73	1065.59	1370.32	1417.56	1939.04	1480.23	1567.26
FBgn0037356	613.574	1041.39	589.77	611.451	744.505	802.044	594.973	644.167	768.972	866.479	614.438	643.212	616.168	830.78	676.486	704.766
FBgn0027951	1904.95	1565.6	2060.45	2124.29	1863.04	1858.5	2174.66	2043.18	2031.91	1861.51	2129.97	2138.11	2051.88	1595.73	1953.1	1998.5
FBgn0262125	3215.81	2872.11	3353.45	3706.12	3287.19	3156.43	3502.16	3951.33	3082.78	3068.57	3414.48	3646.99	3420.3	2880.65	3507.01	3567.76
FBgn0037358	2251.3	3368.2	1841.02	1789.93	2307.25	2203.47	1699.77	1516.34	2775.02	2668.72	1836.06	1874.98	2177.38	2863.98	1903.54	1772.9
FBgn0037359	157.121	257.084	177.68	203.427	206.116	207.842	172.488	189.266	268.968	217.872	158.448	186.862	135.33	124.159	166.107	175.692
FBgn0037360	1761.59	1519.41	2304.49	2416.58	1606.28	1628.24	2384.26	2415.07	1806.91	1633.62	2342.85	2413.95	1647.4	1322.42	2097.78	2336.91
FBgn0264902	8.02807	9.0381	2.14073	1.16912	12.438	5.17448	4.36678	4.42726	6.89661	4.17379	1.20952	2.54234	6.80431	8.3328	1.33958	0.998253
FBgn0046222	1029.89	1232.19	1163.48	1125.86	1252.69	1294.48	1247.81	1161.05	1517.25	1316.41	1156.3	1273.71	1056.94	1133.26	1039.51	1168.95
FBgn0010772	2070.09	1599.74	1784.29	1732.64	1780.41	1914.56	1573.13	1581.64	1942.26	2020.95	1827.59	1816.5	1842.46	1821.55	1702.6	1695.03
FBgn0037363	2051.74	1021.31	2458.62	2353.44	1468.58	1647.21	2511.99	2415.07	1589.67	1783.04	2400.9	2642.76	2150.92	1467.41	2450.08	2443.72
FBgn0037364	303.92	329.389	451.693	430.237	322.5	359.626	580.781	430.551	446.555	363.955	509.209	472.875	308.462	254.15	373.742	486.149
FBgn0261261	1517.3	909.836	1960.9	2121.96	914.195	936.581	1419.2	1468.75	1226.73	934.93	1755.02	1676.67	1389.59	1017.44	1894.16	1780.88
FBgn0037365	0	0	1.07036	2.33824	0	0	0	0	0	0	1.20952	1.27117	1.51207	0	0	2.99476
FBgn0004878	50.4621	41.1736	44.9552	43.2575	37.3141	42.2582	37.1176	45.3795	43.9659	59.2679	38.7048	47.0333	31.7534	34.9978	49.5643	36.9354
FBgn0266229	0	0	0	0	0	0	0	0	0	0	0	0	0	0	0	0
FBgn0037368	261.486	367.55	298.631	273.575	245.207	310.469	293.666	276.704	407.762	343.921	315.686	378.809	224.542	223.319	255.859	263.539
FBgn0037369	591.783	720.036	591.911	623.142	636.116	640.773	587.332	598.788	635.35	659.459	643.467	696.601	517.128	489.969	608.167	599.95
FBgn0037370	772.988	1172.94	770.661	795.003	943.513	888.285	787.112	835.646	1068.97	1089.36	700.314	899.988	792.324	884.11	829.197	856.501
FBgn0037371	506.915	301.27	859.501	784.481	393.575	399.297	890.823	852.248	437.072	450.77	850.295	800.837	478.57	344.145	672.467	843.524
FBgn0027497	875.059	785.311	907.667	870.996	836.901	871.9	887.548	892.094	929.318	979.172	974.876	1057.61	914.802	751.619	980.569	974.295
FBgn0037372	274.101	335.414	366.064	328.523	233.657	269.935	385.368	283.345	421.555	328.895	454.781	449.994	280.489	290.815	380.439	360.369
FBgn0266672	1068.88	904.814	1387.19	1311.75	992.377	946.93	1310.03	1384.63	1200.87	1110.23	1352.25	1445.32	1262.58	949.106	1504.34	1331.67
FBgn0027608	1809.76	1705.19	1359.36	1340.98	1932.34	1975.79	1429.03	1308.26	1857.77	1919.11	1392.16	1330.92	2027.68	2263.19	1545.87	1349.64
FBgn0037374	1607.91	1683.1	1319.76	1220.56	1528.1	1548.89	1341.69	1213.07	1545.7	1598.56	1366.76	1388.12	1557.43	1469.07	1257.86	1357.62
FBgn0037375	82.5744	46.1947	85.629	57.287	73.7397	70.7179	86.2439	64.1953	41.3796	45.9117	56.8476	59.745	79.3836	65.8291	85.7328	49.9126
FBgn0037376	662.889	1025.32	785.646	769.282	890.207	884.836	1030.56	819.044	1233.63	839.767	880.533	795.752	679.675	839.946	691.221	900.424
FBgn0028690	3547.26	3635.33	4241.85	4588.8	3713.64	3892.93	4708.48	4785.87	4107.79	3763.09	3964.82	4366.47	3572.26	3602.27	3853.96	4720.74
FBgn0037377	550.496	868.662	500.93	517.921	724.959	728.739	575.323	608.749	817.248	688.676	529.771	542.79	430.184	542.465	463.493	596.955
FBgn0037378	887.675	1516.39	739.621	743.562	1059.01	1036.62	800.212	762.596	1115.53	1055.13	676.124	669.907	796.86	1156.59	815.801	930.372
FBgn0037379	662.889	421.778	1119.6	1056.89	506.405	546.77	1203.05	1143.34	593.97	558.454	1045.03	1318.2	730.329	431.639	1153.37	1128.03
FBgn0263353	474.803	227.961	403.527	401.009	271.86	319.093	436.678	312.122	295.692	301.348	455.99	400.419	458.913	349.144	439.381	385.326
FBgn0261561	177.764	120.508	149.851	148.478	205.227	182.832	209.605	231.325	131.898	133.561	124.581	105.507	181.448	148.324	184.861	172.698
FBgn0037382	459.894	410.732	525.548	548.318	445.992	448.455	577.506	533.485	447.417	438.248	526.143	594.908	450.596	338.312	478.228	494.135
FBgn0037383	172.03	268.13	184.102	121.589	215	206.979	188.863	185.945	199.14	201.177	160.867	169.066	172.376	199.987	180.843	196.656
FBgn0037384	381.907	378.596	364.994	382.303	381.137	357.901	405.019	406.202	422.417	337.242	396.724	404.232	340.215	317.48	365.704	380.334
FBgn0037385	0	0	0	0	0	0	0	0	0	0	0	1.27117	0	0	0	0
FBgn0037386	1285.64	1233.2	1540.25	1076.76	736.509	764.96	838.421	745.994	1341.39	890.687	867.228	861.853	799.128	724.12	641.657	698.777
FBgn0266702	201.849	313.321	100.614	134.449	286.075	238.026	175.763	169.343	132.76	161.108	87.0857	58.4738	139.11	282.482	112.524	149.738
FBgn0037387	4471.63	3851.24	4473.05	4535.02	4043.25	3464.31	4027.26	4348.68	2652.61	3813.18	4614.33	4866.04	5129.69	5478.82	4625.55	6328.92
FBgn0037388	0	0	0	0	0	0	1.09169	0	0	0	1.20952	0	0.756034	0	0	0
FBgn0037389	0	0	1.07036	0	0.88843	1.72483	0	0	0	0.834759	0	0	0	0	0	0
FBgn0029088	602.105	345.456	839.164	861.643	524.174	534.696	924.665	917.551	442.245	430.735	852.714	875.836	619.948	419.14	847.951	860.494
FBgn0085316	1.14687	0	0	1.16912	0	0	0	0	0	0.834759	0	0	0	0	0	0
FBgn0028436	299.332	343.448	267.591	293.45	334.05	340.653	301.308	343.113	352.589	331.399	315.686	350.843	297.122	304.147	278.632	346.394
FBgn0037391	1916.41	1589.7	2026.2	1903.33	1635.6	1538.54	1529.46	1432.22	1930.19	2066.86	2076.75	1899.13	2005.76	1853.22	2056.25	2014.47
FBgn0083949	180.058	78.3302	154.132	157.831	151.922	160.409	150.654	153.847	114.656	140.239	187.476	156.354	176.912	136.658	182.182	154.729
FBgn0267399	0	0	0	0	0	0	0	0	0	0	0	0	0	0	0	0
FBgn0267400	0	0	0	0	0	0	0	0	0	0	0	0	0	0	0	0
FBgn0040679	0	0	0	0	0	0	0	0	0	0	0	0	0	0	0	0
FBgn0266230	0	0	0	0	0	0	0	0	0	0	0	0	0	0	0	0
FBgn0266231	0	0	0	0	0	0	0	0	0	0	0	0	0	0	0	0
FBgn0011281	596.371	952.013	416.371	381.134	804.918	641.635	435.586	402.881	687.074	726.24	515.257	474.146	631.289	771.617	651.034	460.195
FBgn0010403	366.997	671.832	196.947	160.17	555.269	397.572	219.431	205.868	381.038	429.066	231.019	176.693	282.001	463.304	262.557	189.668
FBgn0266232	0	1.00423	0	0	0	0	0	0	0	0	0	0	0	0	0	0
FBgn0266233	0	0	0	0	0	0	0	0	0	0	0	0	0	0	0	0
FBgn0003261	16871.6	14357.5	14923	13979.2	18301.7	18913.6	15317.6	15214.3	18475.1	18596.8	16245.1	15203.2	15945.5	13349.1	16467.4	12244.6
FBgn0037395	0	0	0	0	0	0.862413	0	0	0	0.834759	2.41905	1.27117	1.51207	0	0	0
FBgn0037396	259.192	322.359	155.203	149.648	190.124	180.244	177.946	514.67	162.932	237.071	156.029	96.6089	754.522	460.804	451.437	414.275
FBgn0037397	0	0	0	0	0	0	0	1.10682	0	0	0	0	0	0	0	0
FBgn0266226	0	0	0	0	0	0	0	0	0	0	0	0	0	0	0	0
FBgn0037398	0	0	1.07036	0	0.88843	0	0	0	0.862076	0	0	2.54234	0.756034	0	0	0
FBgn0037399	0	1.00423	0	0	0	2.58724	0	0	0	1.66952	0	0	0	0	0	0
FBgn0026077	3650.48	2486.48	2650.22	2706.52	3184.13	2694.18	2569.85	2602.12	1865.53	2422.47	2402.11	2229.63	3833.85	3428.11	2671.11	2895.93
FBgn0266234	0	0	0	0	0	0	0	0	0	0	0	0	0	0	0	0
FBgn0046878	86.015	171.724	108.107	78.3312	128.822	98.3151	80.7854	202.547	109.484	119.37	96.7619	111.863	127.77	219.986	103.147	154.729
FBgn0046876	119.274	177.749	126.303	101.714	146.591	120.738	106.986	184.838	81.8972	110.188	95.5524	110.592	122.478	165.823	85.7328	153.731
FBgn0046875	135.33	134.567	160.554	185.89	146.591	125.05	151.746	161.595	106.897	118.536	151.19	161.439	216.226	182.488	196.918	195.658
FBgn0037402	6.8812	3.0127	1.07036	2.33824	2.66529	1.72483	2.18339	2.21363	0.862076	0.834759	0	1.27117	2.2681	4.99968	4.01873	0
FBgn0263497	0	0	0	0	0	0	0	0	0	0	0	0	0	0	0	0
FBgn0263498	0	0	0	0	0.88843	0	0	0	0	0	0	0	0	0	0	0
FBgn0051559	0	9.0381	3.21109	4.67649	9.77273	4.31207	5.45847	8.85453	9.48283	10.8519	3.62857	3.81351	12.0965	9.99936	5.3583	9.98253
FBgn0037405	224.786	448.892	341.446	589.237	285.186	245.788	783.837	434.979	486.211	319.713	1051.08	214.828	185.984	328.312	388.477	994.26
FBgn0037406	0	0	0	1.16912	0	0.862413	0	0	0	0	0	0	0	0	0	0
FBgn0266704	0	0	0	0	0	0	0	0	0	0	0	0	0.756034	0	0	0
FBgn0051562	1.14687	9.0381	1.07036	3.50737	5.33058	4.31207	3.27508	0	6.89661	0	0	0	1.51207	4.99968	1.33958	0.998253
FBgn0037408	29.8185	34.1439	24.6183	30.3972	26.6529	36.2213	33.8425	27.6704	42.2417	28.3818	18.1429	22.8811	33.2655	39.9974	49.5643	17.9686
FBgn0037409	60.7839	16.0677	43.8849	38.581	31.9835	37.9462	41.4844	43.1658	22.414	36.7294	36.2857	26.6946	45.3621	39.1642	34.829	40.9284
FBgn0037410	152.533	190.804	155.203	153.155	135.93	109.526	126.637	99.6135	169.829	174.465	172.962	160.167	165.572	168.323	113.864	122.785
FBgn0037411	0	1.00423	0	0	2.66529	0	0	1.10682	0	0.834759	0	0	1.51207	1.66656	0	0
FBgn0037412	0	1.00423	0	0	0	0.862413	0	1.10682	0	0.834759	0	0	0	1.66656	0	0.998253
FBgn0037413	0	0	0	0	0	0	0	0	0.862076	0.834759	0	0	0	0	0	0
FBgn0027527	0	1.00423	0	2.33824	0	1.72483	0	1.10682	0	0	0	1.27117	1.51207	0.83328	2.67915	0
FBgn0037414	1.14687	1.00423	2.14073	0	1.77686	1.72483	1.09169	4.42726	1.72415	1.66952	0	1.27117	3.02414	3.33312	1.33958	0.998253
FBgn0037415	18.3499	6.0254	5.35181	10.5221	20.4339	12.9362	13.1003	9.96135	10.3449	15.0257	15.7238	3.81351	16.6328	15.8323	20.0936	14.9738
FBgn0037416	11.4687	14.0593	16.0554	14.0295	15.9917	13.7986	18.5588	9.96135	8.62076	10.8519	7.25714	17.7964	15.8767	15.8323	8.03745	9.98253
FBgn0037417	0	0	0	0	0	0.862413	0	0	0	0	0	0	0	0	0	0
FBgn0037418	2.29373	2.00847	2.14073	0	0	0.862413	0	0	0	0	0	0	0	0	0	0
FBgn0037419	4.58747	2.00847	3.21109	4.67649	0.88843	3.44965	1.09169	1.10682	1.72415	1.66952	0	0	1.51207	0.83328	1.33958	1.99651
FBgn0037420	0	6.0254	4.28145	2.33824	3.55372	1.72483	2.18339	1.10682	0.862076	0.834759	1.20952	2.54234	1.51207	3.33312	0	0.998253
FBgn0037421	0	0	0	0	0	0	1.09169	1.10682	0	0	0	0	0	0	0	0
FBgn0037422	1.14687	0	0	0	0	0	4.36678	1.10682	0.862076	0	0	0	0	0	0	0
FBgn0040279	0	1.00423	2.14073	1.16912	0	0	1.09169	0	0	0.834759	2.41905	1.27117	2.2681	0	0	0.998253
FBgn0037424	10.3218	17.072	10.7036	19.8751	14.2149	18.1107	2.18339	7.74771	14.6553	40.0684	21.7714	15.254	37.8017	37.4976	10.7166	8.98428
FBgn0051561	0	0	0	0	0	0	0	0	0	0	1.20952	0	0	0	0	0
FBgn0267690	0	0	0	0	0	0	0	0	0	0	0	0	0	0	0	0
FBgn0051560	0	0	0	0	0	0	0	1.10682	0	0	0	0	0	0	0	0
FBgn0037427	10.3218	5.02117	4.28145	7.01473	8.8843	5.17448	5.45847	4.42726	10.3449	4.17379	6.04762	7.62702	15.1207	9.16608	8.03745	5.98952
FBgn0037428	2.29373	0	1.07036	0	0	0	0	0	0.862076	0	1.20952	0	0	0	0	0
FBgn0037429	10.3218	14.0593	14.9851	23.3824	12.438	5.17448	7.64186	6.6409	0.862076	8.34759	15.7238	16.5252	12.0965	15.8323	1.33958	15.972
FBgn0037430	0	0	1.07036	1.16912	0	0	0	0	0	0	2.41905	0	0	1.66656	0	1.99651
FBgn0037431	0	0	0	0	0	0	0	0	0	0	2.41905	0	0	0.83328	0	0
FBgn0037432	0	0	0	0	0	0	0	0	0	0	0	0	0	0	0	0
FBgn0037433	1089.52	1660	754.606	866.319	1409.05	1241.01	766.37	893.201	1089.66	1280.52	770.466	798.295	1142.37	1709.89	886.799	964.312
FBgn0261789	1064.29	2146.05	877.697	876.841	1393.95	1484.21	840.605	814.617	1869.84	1701.24	859.971	844.057	916.314	1303.25	697.919	793.611
FBgn0037435	186.939	204.864	201.228	242.008	197.232	202.667	233.623	224.684	187.933	185.316	221.343	240.251	207.153	153.324	206.295	216.621
FBgn0037436	1.14687	0	0	0	0.88843	0	0	0	1.72415	0	0	1.27117	0	0	0	0
FBgn0267698	1381.97	1208.09	1511.35	1584.16	1323.76	1417.81	1540.38	1618.17	1536.22	1476.69	1739.29	1658.88	1521.9	1249.92	1537.83	1527.33
FBgn0261641	1719.15	1319.56	1713.65	1622.74	1670.25	1636	1585.14	1607.1	1629.32	1773.03	1713.89	1653.79	1603.55	1459.91	1616.87	1616.17
FBgn0037439	698.442	520.193	843.446	897.886	560.6	570.055	861.347	937.473	540.522	548.436	914.4	903.802	595.755	372.476	841.253	661.842
FBgn0037440	1133.1	1155.87	1206.3	1139.89	1110.54	1028.86	1086.24	1248.49	1031.9	1024.25	1109.13	1330.92	1165.81	1233.25	1156.05	1315.7
FBgn0260766	2.29373	2.00847	1.07036	0	3.55372	4.31207	0	4.42726	0	3.33903	1.20952	2.54234	3.02414	3.33312	1.33958	0.998253
FBgn0261006	0	0	0	0	0	0	0	0	0	0	0	0	0	0	0	0
FBgn0027514	280.982	265.118	252.606	242.008	246.984	213.878	232.531	255.675	262.071	246.254	255.209	265.675	235.127	190.821	245.142	237.584
FBgn0260645	0	0	0	0	0	0	0	0	0	0	0	0	0	0	0	0
FBgn0010282	1439.32	1780.51	1359.36	1270.84	1836.39	1728.28	1358.07	1434.43	1961.22	1889.06	1195.01	1241.93	1310.96	1408.24	1223.03	1339.66
FBgn0037442	2162.99	1738.33	2150.36	2044.79	1979.42	2032.71	2029.46	1925.86	2163.81	2078.55	2184.4	2045.31	2213.67	2086.53	2310.77	2110.31
FBgn0037443	2377.45	2091.82	2106.47	2132.48	2538.25	2385.43	1907.19	1972.35	2908.64	2808.13	2212.22	2340.22	2530.45	2504.84	1998.65	2078.36
FBgn0264495	2684.81	1125.75	3925.02	3924.74	2010.52	2245.72	4122.24	4198.15	2360.36	2227.14	4111.17	4451.64	2910.73	1598.23	3540.5	3695.53
FBgn0264787	0	5.02117	2.14073	1.16912	8.8843	5.17448	3.27508	3.32045	6.03453	9.18234	1.20952	1.27117	4.53621	14.999	4.01873	3.99301
FBgn0037445	1167.51	634.676	1391.47	1528.04	797.811	921.057	1540.38	1572.79	871.559	858.132	1707.85	1758.03	1211.17	670.791	1517.74	1453.46
FBgn0037446	506.915	609.57	298.631	353.075	634.339	529.522	393.01	367.463	543.108	589.34	319.314	336.86	434.72	530.799	395.175	383.329
FBgn0037447	1443.91	1116.71	1558.45	1627.42	1845.27	1837.8	2407.19	2302.18	918.973	906.548	1138.16	1215.24	1665.54	1596.56	1540.51	1663.09
FBgn0037448	269.514	136.576	230.128	197.582	194.566	234.576	237.989	179.304	187.933	191.994	194.733	218.641	266.88	199.987	179.503	219.616
FBgn0011919	0	0	0	0	0	0	0	0	0	0	0	0	0	0	0	0
FBgn0037449	0	0	0	0	1.77686	0	0	0	0	0	0	0	0.756034	0	0	0.998253
FBgn0053202	196.114	107.453	141.288	139.126	132.376	127.637	158.296	127.284	110.346	119.37	158.448	132.202	171.62	160.823	200.936	127.776
FBgn0046873	0	0	0	0	0	0	0	0	0	0	0	0	0	0	0	0
FBgn0037454	0	0	1.07036	1.16912	0.88843	0	0	1.10682	0	0	0	0	0	0	0	0
FBgn0037455	0	0	0	0	0	0	0	0	0	0	0	0	0	0	0	0
FBgn0037456	0	0	0	0	1.77686	0	0	0	0	0	0	0	0	0	0	0
FBgn0051482	0	0	0	0	0	0	0	0	1.72415	0	0	0	0	0	0	0
FBgn0250846	0	1.00423	0	0	0	0	0	0	0	0	0	0	0	0	2.67915	0
FBgn0037460	0	0	0	0	0	0	0	0	0	0	0	0	0	0	0	0
FBgn0037461	0	0	0	0	2.66529	0	0	0	0	0	0	0	0	0.83328	0	0
FBgn0037462	0	0	0	1.16912	0	0	0	0	0	0.834759	0	0	0	0	0	0
FBgn0051286	1.14687	1.00423	0	0	1.77686	1.72483	0	1.10682	0	0.834759	0	1.27117	0	0.83328	1.33958	1.99651
FBgn0026565	733.995	880.713	651.851	678.091	849.339	720.115	694.318	667.41	675.005	727.91	557.59	718.211	835.418	1085.76	786.331	929.373
FBgn0010355	1305.13	698.947	1809.98	1688.21	1067.89	1160.81	1827.5	1759.84	1108.63	1071.83	1800.98	1831.76	1324.57	911.609	1560.61	1825.8
FBgn0026566	1066.59	1888.96	939.778	1026.49	1428.6	1388.49	1024.01	1052.58	1753.46	1709.59	947.057	1071.6	945.043	1228.26	976.55	1057.15
FBgn0262801	1448.49	1926.12	1418.23	1550.26	1517.44	1619.61	1289.29	1575	1674.15	1626.94	1201.06	1432.61	1447.05	1479.07	1260.54	1355.63
FBgn0024912	102.071	147.622	88.8401	80.6694	124.38	131.087	104.803	118.429	153.449	133.561	114.905	142.371	102.065	106.66	132.618	111.804
FBgn0002522	35.5529	20.0847	53.5181	71.3164	31.0951	27.5972	45.8512	46.4863	28.4485	38.3989	61.6857	38.1351	45.3621	44.1639	46.8851	52.9074
FBgn0000552	0	0	0	0	0	2.58724	0	2.21363	0	0	0	0	0.756034	0	0	0
FBgn0004777	13.7624	10.0423	10.7036	14.0295	4.44215	12.0738	15.2837	2.21363	4.31038	7.51283	10.8857	8.89819	7.56034	6.66624	6.69788	5.98952
FBgn0004778	0	0	1.07036	2.33824	0	0	0	0	0	0	0	0	0	0	0	0
FBgn0004779	0	0	1.07036	0	0	0	0	0	0	0	0	0	0	0	0	0
FBgn0004780	36.6997	30.127	32.1109	38.581	15.9917	13.7986	19.6505	19.9227	8.62076	19.1994	4.83809	13.9829	18.1448	10.8326	12.0562	14.9738
FBgn0004781	22.9373	21.0889	19.2665	9.35298	3.55372	4.31207	0	1.10682	5.17245	9.18234	6.04762	0	3.78017	2.49984	1.33958	0
FBgn0063127	0	0	0	0	0	0	0	0	0	0	0	0	0	0	0	0
FBgn0004782	401.403	517.18	527.689	619.635	102.169	153.51	206.33	222.47	202.588	219.542	222.552	231.353	161.791	155.823	175.484	148.74
FBgn0004783	113.54	139.588	194.806	191.736	24.8761	31.9093	43.6678	59.7681	37.9313	44.2422	62.8952	77.5414	24.9491	31.6646	54.9226	36.9354
FBgn0051481	27.5248	23.0974	11.774	19.8751	21.3223	19.8355	24.0173	6.6409	11.207	18.3647	18.1429	15.254	34.0215	18.3322	22.7728	13.9755
FBgn0004054	0	0	0	0	0	0	0	0	0	0	0	0	0	0	0	0
FBgn0085326	2.29373	0	0	0	4.44215	0.862413	1.09169	0	0	0	1.20952	0	0	2.49984	6.69788	0
FBgn0004053	26.3779	24.1016	32.1109	22.2133	19.5455	44.8455	22.9256	38.7386	31.0347	55.9288	22.9809	26.6946	22.681	22.4986	29.4707	13.9755
FBgn0000166	338.326	339.431	540.533	491.031	366.033	436.381	652.833	605.428	518.97	418.214	650.724	545.332	387.846	284.149	515.737	639.88
FBgn0267153	0	3.0127	1.07036	2.33824	1.77686	0.862413	0	3.32045	2.58623	0.834759	0	1.27117	0	2.49984	0	1.99651
FBgn0000071	8.02807	33.1397	14.9851	25.7207	11.5496	15.5234	17.4671	22.1363	18.1036	19.1994	4.83809	8.89819	12.0965	38.3309	2.67915	34.9388
FBgn0266235	0	0	0	0	0	0	0	0	0	0	0	0	0	0	0	0
FBgn0261638	4.58747	1.00423	2.14073	3.50737	1.77686	5.17448	1.09169	0	2.58623	2.50428	1.20952	0	1.51207	2.49984	1.33958	4.99126
FBgn0262174	0	0	0	0	0	0	0	0	0	0	0	0	0	0	0	0
FBgn0263383	0	0	0	0	0	0	0	0	0	0	0	0	0	0	0	0
FBgn0000439	50.4621	58.2456	50.307	52.6105	65.7439	69.8555	45.8512	48.6999	56.0349	56.7636	60.4762	52.118	63.5069	66.6624	68.3183	36.9354
FBgn0261503	18.3499	15.0635	16.0554	14.0295	25.7645	13.7986	7.64186	3.32045	20.6898	23.3732	8.46666	10.1694	18.1448	20.832	4.01873	7.98602
FBgn0262424	0	0	0	0	0	0	0	0	0	0	0	0	0	0	0	0
FBgn0267575	2.29373	8.03387	2.14073	2.33824	1.77686	1.72483	5.45847	0	5.17245	3.33903	2.41905	0	2.2681	7.49952	1.33958	0
FBgn0051485	0	0	0	0	0	0	0	0	0.862076	0.834759	0	0	0	0	0	0
FBgn0026162	0	0	0	0	0	0	0	0	0	0	0	0	0	0	0	0
FBgn0261504	11.4687	15.0635	16.0554	5.84561	7.10744	7.76172	6.55017	3.32045	6.89661	6.67807	2.41905	7.62702	4.53621	3.33312	2.67915	9.98253
FBgn0026163	0	0	0	0	0	0	0	0	0	0	0	0	0	0	0	0
FBgn0026164	0	0	0	0	0	0	0	0	0	0	0	0	0	0	0	0
FBgn0000003	5.73433	10.0423	11.774	10.5221	5.33058	6.03689	7.64186	9.96135	7.75868	7.51283	8.46666	3.81351	3.78017	8.3328	10.7166	7.98602
FBgn0011904	0	0	0	0	0	0	0	0	0	0	0	0	0	0	0	0
FBgn0003339	96.3368	60.254	77.0661	64.3017	62.1901	67.2682	96.0691	85.2248	42.2417	51.755	74.9905	58.4738	84.6758	83.328	62.96	71.8742
FBgn0267561	0	0	0	0	0	0	0	0	0	0	0	0	0	0	0	0
FBgn0267562	0	0	0	0	0	0	0	0	0	0	0	0	0.756034	0	0	0
FBgn0267563	0	0	0	0	0	0	0	0	0	0	0	0	0	0	0	0
FBgn0267564	0	0	0	0	0	0	0	0	0	0	0	0	0	0	0	0
FBgn0267565	1.14687	1.00423	0	0	0	0	0	0	0.862076	2.50428	1.20952	0	0	0	0	0
FBgn0267560	0	0	0	0	0	0	0	0	0	0	0	0	0	0	0	0
FBgn0001077	0	0	0	0	0	0	0	0	0	0	0	0	0.756034	0.83328	0	0.998253
FBgn0266236	0	0	1.07036	0	0	0	0	0	0.862076	0	0	0	0	0	0	0
FBgn0267119	0	5.02117	10.7036	2.33824	7.10744	6.03689	1.09169	1.10682	3.4483	5.84331	1.20952	2.54234	3.78017	9.16608	4.01873	11.979
FBgn0266237	3.4406	1.00423	3.21109	3.50737	0.88843	2.58724	1.09169	0	2.58623	2.50428	1.20952	1.27117	1.51207	3.33312	1.33958	0
FBgn0260642	220.198	155.656	140.218	148.478	169.69	161.271	136.462	121.75	143.105	156.935	187.476	149.998	226.81	222.486	167.447	161.717
FBgn0262897	0	0	0	0	0	0	0	0	0	0.834759	3.62857	1.27117	1.51207	0	0	0
FBgn0267559	1.14687	0	0	0	0.88843	0	0	0	0	0	0	0	0.756034	0.83328	0	0
FBgn0266238	1.14687	2.00847	3.21109	1.16912	4.44215	1.72483	0	0	5.17245	4.17379	1.20952	5.08468	3.78017	4.99968	1.33958	6.98777
FBgn0024289	1448.49	3604.19	1998.37	2418.91	1478.35	2379.4	2138.63	2657.47	1611.22	1876.54	1295.4	2523.27	2084.39	4095.57	754.181	4524.08
FBgn0026563	26.3779	85.3599	75.9957	61.9635	36.4256	75.8924	29.4758	45.3795	89.6559	24.208	35.0762	27.9657	41.5819	72.4954	21.4332	33.9406
FBgn0019828	0	0	0	0	1.77686	0	0	0	0	0	0	0	0	0	0	0
FBgn0037463	0	0	0	0	1.77686	0	0	0	0	0	0	0	0	0	0	0
FBgn0037464	0	0	0	0	1.77686	0	0	0	1.72415	0	0	0	0	0	0	0
FBgn0037465	746.61	768.239	705.369	721.348	826.24	733.914	681.217	695.081	704.316	728.744	628.952	664.822	765.107	699.122	692.56	640.878
FBgn0037466	834.919	710.997	722.495	696.797	804.03	739.95	722.702	744.887	856.041	799.699	789.819	744.906	762.083	727.454	722.031	698.777
FBgn0037467	699.589	498.1	814.546	795.003	552.604	614.038	755.453	928.619	500.004	576.818	805.543	861.853	721.257	539.966	810.443	786.623
FBgn0267568	0	5.02117	0	0	0.88843	3.44965	0	0	0.862076	0.834759	0	1.27117	0	0	5.3583	1.99651
FBgn0037468	3020.85	4250.92	2840.74	2822.26	3862.9	3997.28	3247.79	3082.48	4972.45	3865.77	2908.9	2855.05	2984.82	3095.64	2455.44	2855
FBgn0010774	1971.46	3450.55	1834.6	1958.28	3355.6	2901.16	2029.46	1984.52	3025.02	3242.2	1794.93	1868.62	1994.42	2548.17	1837.9	1769.9
FBgn0037469	298.185	505.13	275.083	298.126	350.042	349.277	284.932	281.131	370.693	413.206	292.705	303.81	281.245	436.639	313.461	316.446
FBgn0037470	1244.35	1220.14	1175.26	1297.73	1194.05	1191.85	1251.08	1291.65	1369.84	1355.65	1234.92	1360.15	1109.1	1079.93	1189.54	1211.88
FBgn0267567	13.7624	22.0931	11.774	16.3677	17.7686	18.1107	7.64186	12.175	16.3794	14.1909	15.7238	10.1694	12.8526	13.3325	10.7166	8.98428
FBgn0003884	21003.7	24829.7	26797.6	29843	23942.3	22691.8	28148.3	30792.7	22909.7	22536.8	23424.8	27196.7	25577.4	21093.7	25186.7	28989.3
FBgn0263768	386.494	611.578	348.938	347.229	486.86	482.089	402.835	350.861	690.523	589.34	476.552	457.621	372.725	433.306	408.57	357.375
FBgn0040670	13.7624	6.0254	3.21109	4.67649	8.8843	6.8993	10.9169	4.42726	4.31038	12.5214	6.04762	8.89819	6.04827	7.49952	8.03745	5.98952
FBgn0261238	1270.73	849.582	1674.05	1719.78	1121.2	1296.21	1901.73	1758.73	1239.67	1326.43	1797.35	1868.62	1434.95	1049.1	1718.68	1700.02
FBgn0267566	1.14687	1.00423	0	0	0	0.862413	0	0	0	0	0	0	0.756034	0	0	0
FBgn0014863	11441.1	11213.3	9863.39	10038.1	12774.7	12622.3	11070.9	10890	9054.38	9602.23	9495.97	8998.61	13486.1	14105.8	11890.1	11236.3
FBgn0037472	407.138	496.091	399.245	413.869	501.963	493.3	450.87	425.017	537.935	492.508	390.676	408.046	384.821	413.307	395.175	393.312
FBgn0037473	605.546	805.395	478.452	455.958	711.633	701.142	472.704	459.329	709.488	678.659	436.638	452.537	603.315	759.952	474.21	522.086
FBgn0262149	20.6436	17.072	4.28145	9.35298	13.3265	9.48654	6.55017	3.32045	18.9657	24.208	7.25714	6.35585	9.07241	14.999	5.3583	12.9773
FBgn0051248	326.857	281.185	341.446	349.567	275.413	265.623	374.451	359.715	185.346	255.436	431.8	368.639	373.481	310.814	379.1	364.362
FBgn0051494	0	2.00847	0	0	0	2.58724	1.09169	1.10682	0	0.834759	1.20952	1.27117	0.756034	1.66656	0	0
FBgn0051491	0	0	0	0	0	0	0	0	0	0	0	0	0	0	0	0
FBgn0051493	0	0	4.28145	0	0	0	0	0	0	2.50428	0	0	0	0	0	0
FBgn0037475	33.2591	45.1905	33.1812	26.8898	48.8637	43.1207	37.1176	44.2726	40.5176	47.5812	31.4476	24.1522	46.1181	56.6631	34.829	35.9371
FBgn0261702	0	0	0	0	0	0.862413	0	0	0	0	0	0	0	0	0	0
FBgn0037477	0	0	0	0	1.77686	0.862413	0	1.10682	0	0	0	2.54234	0.756034	2.49984	0	0
FBgn0037478	317.682	451.905	257.957	263.052	423.781	412.233	315.5	293.306	377.589	340.582	216.505	263.132	300.902	384.975	254.519	243.574
FBgn0250732	1228.29	1008.25	980.452	1034.67	1223.37	1153.05	1138.64	1100.18	981.042	1023.41	957.943	1043.63	1094.74	1073.26	948.419	1060.14
FBgn0011020	219.052	182.771	324.32	357.751	215	211.291	400.652	316.549	248.278	222.881	351.971	345.758	223.03	159.157	262.557	449.214
FBgn0037481	184.646	274.156	170.188	168.354	252.314	296.67	213.972	201.441	231.036	182.812	174.171	149.998	144.403	196.654	156.73	186.673
FBgn0267569	0	1.00423	0	0	0	0	0	0	0.862076	0	0	0	0.756034	0	0	0
FBgn0002306	880.794	437.846	857.36	726.025	659.215	583.854	759.819	736.033	458.624	575.983	674.914	700.415	973.772	749.119	826.518	778.637
FBgn0037482	996.627	986.157	888.401	840.599	1044.79	1023.68	938.857	907.589	1100.87	1048.46	844.247	856.769	858.099	827.447	746.143	860.494
FBgn0086372	2977.27	2378.03	3267.82	3046.73	2433.41	2570.85	3004.34	3092.44	2886.23	2692.93	3265.71	3312.67	2865.37	2303.19	3078.34	2834.04
FBgn0037483	0	2.00847	4.28145	1.16912	2.66529	4.31207	3.27508	1.10682	2.58623	0	2.41905	2.54234	1.51207	4.99968	1.33958	2.99476
FBgn0250845	0	1.00423	0	0	0.88843	0	0	0	1.72415	0	0	0	0	0	0	0
FBgn0037485	349.794	299.262	309.335	342.553	286.075	397.572	334.059	301.054	250.864	269.627	256.419	288.556	353.824	366.643	337.573	210.631
FBgn0037486	0	0	0	0	3.55372	0	1.09169	0	0	0	0	0	0.756034	0	0	0
FBgn0037487	32.1123	31.1312	33.1812	38.581	31.0951	25.8724	49.1263	49.8067	24.1381	29.2166	20.5619	22.8811	34.0215	28.3315	30.8102	36.9354
FBgn0037488	106.659	105.445	83.4883	78.3312	137.707	102.627	120.086	104.041	103.449	106.014	90.7143	90.2531	129.282	147.491	115.203	100.824
FBgn0037489	861.297	663.798	1088.56	1137.56	720.517	877.074	1064.4	1174.33	833.627	836.428	1143	1203.8	842.978	494.135	1042.19	898.428
FBgn0037490	103.218	101.428	107.036	97.0371	104.835	109.526	93.8857	91.8657	125.001	111.858	82.2476	120.761	81.6517	103.327	89.7516	91.8393
FBgn0037491	365.85	575.426	297.561	333.2	429.112	426.894	323.142	317.656	469.831	447.431	291.495	326.691	329.631	429.973	328.196	322.436
FBgn0037492	178.911	231.978	161.625	156.662	189.236	175.932	184.496	189.266	221.553	197.838	157.238	156.354	132.306	170.822	152.712	151.734
FBgn0011282	80.2807	127.538	52.4478	31.5663	102.169	71.5803	57.8598	39.8454	81.0351	80.9716	26.6095	31.7793	53.6784	80.8282	45.5456	36.9354
FBgn0001112	337.179	186.787	216.213	206.935	109.277	85.3789	80.7854	87.4385	96.5525	102.675	123.371	134.744	114.161	88.3277	85.7328	103.818
FBgn0265426	1.14687	0	0	0	0	0	0	0	0	0	0	0	0	0	0	0
FBgn0028400	825.744	564.379	545.885	509.737	630.786	662.333	564.406	431.658	593.97	575.983	608.39	476.689	729.573	650.792	600.13	425.256
FBgn0037493	0	0	0	0	0	0	0	0	0	0	0	0	0	0	0	0
FBgn0267337	137.624	79.3345	94.1919	94.6989	74.6282	88.8285	76.4186	89.6521	90.518	97.6668	102.81	76.2702	128.526	106.66	133.958	98.827
FBgn0265421	0	0	0	0	0	0	0	0	0	0	0	0	0	0	0	0
FBgn0045843	0	0	0	0	0	0	0	0	0	0	0	0	0	0.83328	0	0
FBgn0260713	0	0	0	0	0	0	0	0	0	0	0	0	0	0	0	0
FBgn0265422	1.14687	3.0127	0	1.16912	2.66529	0	1.09169	0	4.31038	1.66952	0	0	2.2681	2.49984	1.33958	0
FBgn0037498	0	0	0	0	0	0	0	0	0	0	0	0	0	0	0	0
FBgn0265423	1.14687	1.00423	1.07036	0	0	0	0	1.10682	0	0	0	1.27117	0.756034	0	1.33958	1.99651
FBgn0265424	0	0	0	0	0	0	0	0	0	0	0	0	0	0	0	0
FBgn0265425	0	0	0	0	0	0	0	0	0	0	0	0	0	0	0	0
FBgn0051496	0	0	0	0	0.88843	0	0	0	0.862076	1.66952	0	0	0	0	1.33958	0.998253
FBgn0051501	0	1.00423	0	0	0	0	0	0	0	0	0	0	0	0	0	0
FBgn0262982	0	0	0	0	0	0	0	0	0	0	0	0	0	0	0	0
FBgn0037500	0	0	0	0	0	0	0	0	0	0	0	0	0	0	0	0
FBgn0004175	0	0	0	0	0.88843	0	0	0	0	0	0	0	0	0	0	0
FBgn0004174	0	0	0	0	0	0	0	0	0	0	0	0	0	0	0	0
FBgn0004173	0	1.00423	1.07036	0	0	0	1.09169	0	0	0	0	0	0	0	0	0
FBgn0004172	0	0	0	0	1.77686	0	0	0	0	0	0	0	0	0	0	0
FBgn0015770	0	0	0	0	0	0	0	0	0	0	0	0	0	0	0	0
FBgn0267120	0	0	0	0	0	0	0	0	0	0	0	0	0	0	0	0
FBgn0261502	0	0	0	0	0	0	0	0	0	0	0	0	0	0	0	0
FBgn0037501	0	2.00847	1.07036	1.16912	3.55372	2.58724	0	0	0	0.834759	2.41905	0	1.51207	0.83328	0	4.99126
FBgn0051544	0	0	0	0	0	0	0	0	0	0	0	0	0	0	0	0
FBgn0054023	0	0	0	0	0	0	0	0	0	0	0	0	0	0	0	0
FBgn0037502	1.14687	0	0	1.16912	0	0	0	0	0	0	0	0	0	0	0	0
FBgn0037503	4.58747	5.02117	8.5629	8.18385	7.99587	15.5234	5.45847	9.96135	7.75868	10.0171	9.67619	2.54234	10.5845	13.3325	6.69788	7.98602
FBgn0011999	0	0	0	0	0	0	0	0	0	0	0	0	0	0	0	0
FBgn0263565	0	0	0	0	0	0	0	0	0	0	0	0	0	0	0	0
FBgn0011998	0	0	0	0	0	0	0	0	0	0	0	0	0	0	0	0
FBgn0266239	0	0	0	0	0	0	0	0	0	0	0	0	0	0	0	0
FBgn0012000	0	0	0	0	0	0	0	0	0	0	0	0	0	0	0	0
FBgn0037504	457.6	591.494	477.382	433.744	493.967	532.971	456.328	461.542	549.142	506.698	455.99	441.096	413.551	424.973	407.231	395.308
FBgn0043853	8.02807	13.055	7.49254	4.67649	13.3265	9.48654	2.18339	8.85453	12.9311	10.8519	4.83809	12.7117	2.2681	7.49952	4.01873	1.99651
FBgn0065099	2.29373	8.03387	6.42218	5.84561	6.21901	1.72483	3.27508	6.6409	8.62076	4.17379	4.83809	11.4405	2.2681	1.66656	5.3583	3.99301
FBgn0012001	0	0	0	0	0	0	0	0	0	0	0	0	0	0	0	0
FBgn0015569	399.11	371.566	311.476	329.692	558.823	424.307	505.455	543.447	325.003	341.416	309.638	432.198	461.937	361.644	350.969	542.051
FBgn0261508	153.68	318.342	118.81	95.868	205.227	190.593	104.803	104.041	195.691	227.889	101.6	118.219	195.057	351.644	180.843	128.775
FBgn0015577	1365.92	995.196	1267.31	1157.43	1228.7	1104.75	1280.56	1232.99	1006.9	909.052	1053.5	980.072	1385.05	1277.42	1209.64	1243.82
FBgn0037506	1.14687	1.00423	1.07036	2.33824	1.77686	1.72483	2.18339	1.10682	1.72415	1.66952	4.83809	3.81351	3.02414	0.83328	0	5.98952
FBgn0015576	728.26	596.515	662.554	627.819	601.467	582.991	614.624	593.253	593.108	617.721	678.543	776.685	725.793	741.619	530.472	747.691
FBgn0017456	3.4406	12.0508	7.49254	4.67649	2.66529	3.44965	5.45847	4.42726	6.89661	5.84331	2.41905	2.54234	6.04827	7.49952	6.69788	0.998253
FBgn0015575	2620.59	2767.67	2385.84	2408.39	2451.18	2507.9	2305.66	2463.77	2256.05	2551.02	2341.64	2858.86	2549.35	3878.09	2352.29	3414.02
FBgn0015574	17.203	7.02964	6.42218	5.84561	4.44215	8.62413	4.36678	4.42726	6.03453	9.18234	13.3048	19.0676	6.04827	14.999	8.03745	14.9738
FBgn0027934	18.3499	28.1185	16.0554	8.18385	12.438	23.2852	10.9169	12.175	24.1381	15.8604	21.7714	27.9657	15.1207	9.16608	20.0936	14.9738
FBgn0015831	1.14687	4.01693	0	0	1.77686	2.58724	7.64186	2.21363	2.58623	4.17379	2.41905	1.27117	4.53621	4.1664	0	0.998253
FBgn0003885	2292.59	2008.47	2929.58	3198.72	2162.44	2226.75	2933.38	3145.57	2145.71	2181.22	2867.78	3068.6	2370.92	1974.04	2865.35	3060.64
FBgn0261393	747.757	831.505	858.431	805.525	724.959	739.95	757.636	882.132	725.868	772.152	718.457	893.633	715.209	830.78	784.991	952.333
FBgn0015572	107.805	99.4191	99.5437	104.052	92.3968	102.627	98.2525	122.857	103.449	96.832	120.952	124.575	110.381	118.326	113.864	135.762
FBgn0015571	969.102	1005.24	925.864	965.695	857.335	844.302	816.587	864.423	972.422	868.149	919.238	938.124	892.121	979.938	988.607	991.265
FBgn0015570	518.384	553.333	538.392	563.517	526.839	480.364	492.354	482.572	513.797	434.074	445.105	502.112	610.876	838.28	486.266	850.511
FBgn0015568	1653.78	1713.22	1620.53	1463.74	1777.75	1746.39	1495.62	1535.15	1920.7	1964.19	1869.92	1740.23	1857.58	1765.72	1863.35	1720.99
FBgn0267105	0	0	0	0	0	0	0	0	0	0	0	0	0	0	0	0
FBgn0083963	141.065	60.254	79.2068	92.3606	101.281	111.251	131.003	84.118	78.4489	100.171	142.724	91.5242	138.354	110.826	104.487	86.848
FBgn0265420	0	0	0	0	0	0	0	0	0	0	0	0	0	0	0	0
FBgn0051146	372.732	157.665	429.215	413.869	383.802	389.811	497.813	572.224	156.898	249.593	442.686	368.639	439.256	314.147	371.062	405.291
FBgn0265200	0	0	0	0	0	0	0	0	0	0	0	1.27117	0	0	0	0
FBgn0037512	0	0	1.07036	0	0	0	0	0	0	0.834759	2.41905	1.27117	0	0.83328	0	0
FBgn0262899	0	0	0	0	0	0	0	0	0	0	0	0	0	0	0	0
FBgn0266240	0	0	0	0	0	0	0	0	0	0	0	0	0	0	0	0
FBgn0037513	1264.99	1641.92	1153.85	1177.31	1305.99	1247.91	1069.86	1213.07	1178.46	1250.47	1000.28	1022.02	1137.83	1702.39	1003.34	1243.82
FBgn0037514	1.14687	0	0	0	2.66529	0	0	0	0	0.834759	1.20952	0	0.756034	1.66656	1.33958	0
FBgn0037515	699.589	660.786	831.672	770.451	478.864	508.824	655.017	706.149	858.627	738.761	895.047	835.159	801.396	605.795	751.502	737.709
FBgn0037516	0	0	0	0	0	0	0	0	0	0	0	0	0	0	0	0
FBgn0042104	146.799	118.5	132.725	168.354	126.157	97.4527	117.903	96.293	126.725	136.066	165.705	158.896	155.743	117.493	151.372	143.748
FBgn0042102	139.918	109.461	172.328	164.846	103.058	112.976	135.37	151.634	120.691	163.613	263.676	247.878	172.376	191.654	178.164	192.663
FBgn0042105	192.674	198.838	141.288	142.633	262.087	278.559	230.348	247.927	81.0351	95.9972	97.9714	124.575	128.526	191.654	104.487	227.602
FBgn0042103	63.0777	58.2456	43.8849	66.64	52.4174	57.7817	43.6678	36.5249	32.7589	70.1197	44.7524	62.2873	49.8983	68.329	42.8664	80.8585
FBgn0037517	321.123	236.999	326.461	264.222	252.314	257.862	232.531	241.286	255.174	271.297	232.229	308.894	331.143	312.48	251.84	343.399
FBgn0037518	192.674	121.512	196.947	230.317	163.471	195.768	195.413	215.829	177.588	146.083	188.686	203.387	184.472	210.82	223.709	251.56
FBgn0042101	65.3714	100.423	89.9105	67.8091	84.4009	103.49	94.9774	76.3703	156.898	146.918	87.0857	118.219	121.722	144.157	96.4494	89.8428
FBgn0037519	95.1899	81.3429	114.529	102.883	129.711	128.5	122.27	106.254	120.691	85.9801	96.7619	106.778	105.089	101.66	66.9788	153.731
FBgn0037520	120.421	108.457	104.896	85.3459	82.624	83.6541	103.711	46.4863	125.001	107.684	143.933	141.1	102.065	128.325	68.3183	107.811
FBgn0037521	556.23	402.698	409.949	385.81	569.484	570.055	406.11	363.036	481.9	505.029	455.99	364.826	626.752	565.797	432.683	397.305
FBgn0051472	1182.42	1611.79	979.382	1041.69	1300.66	1243.6	1007.63	1127.85	1153.46	1212.07	864.809	1061.43	1156.73	1414.08	940.382	1163.96
FBgn0051473	17.203	21.0889	20.3369	16.3677	17.7686	20.6979	15.2837	9.96135	12.9311	15.0257	8.46666	19.0676	9.82845	11.6659	9.37703	7.98602
FBgn0085413	271.807	133.563	194.806	211.611	173.244	168.171	251.09	188.159	167.243	172.795	274.562	212.285	265.368	180.822	229.067	204.642
FBgn0037525	1455.37	1129.76	1099.26	1058.06	1206.49	1208.24	1024.01	960.716	1030.18	1116.91	982.133	906.344	1329.11	1189.09	1020.76	894.435
FBgn0037526	264.926	287.211	302.913	332.031	300.289	262.174	307.858	297.734	351.727	314.704	290.286	366.097	276.709	288.315	304.084	346.394
FBgn0037529	1525.33	1488.27	1605.54	1836.69	1681.8	1636	1813.3	1980.09	1356.05	1321.42	1505.86	1652.52	1459.15	1387.41	1608.83	1578.24
FBgn0260005	834.919	445.88	721.424	708.488	589.029	544.183	739.077	706.149	664.66	586.835	866.019	823.718	874.732	694.122	770.256	789.618
FBgn0037530	2429.06	2158.1	3587.86	3396.3	2082.48	2277.63	3487.96	3537.38	2511.23	2414.12	3360.06	3701.65	2585.64	1931.54	3192.21	3260.29
FBgn0024909	233.961	145.614	261.168	242.008	220.331	207.842	296.941	263.422	231.036	187.821	279.4	307.623	207.153	144.157	214.332	291.49
FBgn0004901	1014.98	1265.33	1075.71	1219.39	1094.55	1099.58	1188.86	1275.05	1293.11	1128.59	1204.69	1313.12	895.145	754.952	1125.24	1065.14
FBgn0014930	767.254	1308.52	631.514	634.833	856.447	761.511	599.34	594.36	897.421	929.921	628.952	599.992	603.315	916.608	660.411	553.032
FBgn0014931	362.41	456.926	303.983	319.17	403.347	403.609	324.233	334.258	556.901	431.57	371.324	385.165	307.706	265.816	309.442	286.499
FBgn0037531	142.211	103.436	184.102	246.685	117.273	122.463	219.431	218.043	131.898	102.675	261.257	260.59	143.647	80.8282	167.447	240.579
FBgn0002542	877.353	932.933	1437.5	1422.82	909.753	938.305	1769.64	1549.54	1254.32	930.756	1569.96	1782.18	934.458	759.952	1231.07	1629.15
FBgn0261453	0	0	0	0	0	0	0	0	0	0.834759	0	0	0	0	0	0
FBgn0000504	959.927	613.587	580.137	667.569	754.277	699.417	601.524	546.767	441.383	733.753	643.467	582.196	880.78	925.774	605.488	602.945
FBgn0037533	4851.25	4342.31	5611.91	5168.69	4685.58	4813.99	5622.23	5558.43	5225.9	4930.08	5717.42	5618.57	4620.13	4108.07	5382.41	5144
FBgn0010401	509.209	718.027	309.335	300.464	501.963	409.646	330.783	234.645	432.762	505.029	309.638	293.64	467.229	604.128	404.552	289.493
FBgn0259974	0	0	0	0	0	0	0	0	0	0	0	1.27117	0	0	0	0
FBgn0037534	1381.97	1289.44	1191.31	1189	1274.01	1198.75	1169.2	1136.7	1375.87	1161.15	1094.62	1094.48	1368.42	1453.24	1079.7	1197.9
FBgn0037535	231.667	416.757	191.595	237.332	302.066	328.579	235.806	211.402	370.693	347.26	216.505	256.776	213.202	262.483	230.407	198.652
FBgn0266598	123.862	262.105	54.5885	99.3754	198.12	213.878	112.445	71.9431	291.382	233.732	118.533	111.863	96.7724	162.49	80.3745	110.806
FBgn0037536	1794.85	1706.19	1978.03	1767.71	1823.95	1809.34	1926.84	1757.62	2088.81	1965.86	2079.17	1943.62	1931.67	1739.89	2115.19	1930.62
FBgn0037537	1532.21	1929.13	1318.69	1394.76	1637.38	1578.22	1244.53	1393.48	1651.74	1622.77	1234.92	1437.69	1453.1	1806.55	1332.88	1506.36
FBgn0040524	75.6932	89.3768	44.9552	46.7649	51.529	50.02	20.7422	25.4568	93.9663	115.197	70.1524	57.2027	61.2388	109.993	34.829	44.9214
FBgn0037538	262.632	248.046	300.772	350.737	270.083	243.2	401.744	357.502	206.898	268.792	284.238	336.86	255.54	263.317	338.913	368.355
FBgn0037539	444.984	529.231	484.874	475.833	571.261	521.76	459.603	477.038	691.385	671.146	504.371	465.248	516.371	469.137	486.266	526.079
FBgn0037540	128.449	132.559	161.625	157.831	121.715	124.187	215.064	129.497	164.656	128.553	143.933	176.693	120.965	114.993	124.581	191.665
FBgn0037541	2025.37	960.047	2940.29	2949.69	1447.25	1448.85	2860.24	3101.3	1267.25	1300.55	2787.95	2900.81	2237.11	1434.91	2559.93	2811.08
FBgn0001255	13.7624	8.03387	16.0554	14.0295	11.5496	11.2114	7.64186	18.8159	18.9657	10.0171	9.67619	24.1522	9.07241	10.8326	14.7353	15.972
FBgn0037543	286.717	301.27	333.953	300.464	243.43	269.073	331.875	305.481	228.45	225.385	368.905	289.827	251.003	222.486	257.198	265.535
FBgn0037544	349.794	376.588	240.832	218.626	294.959	305.294	218.339	219.15	327.589	345.59	234.648	203.387	288.049	345.811	262.557	238.582
FBgn0010812	814.275	626.642	865.923	975.048	1200.27	1200.48	1735.79	1806.32	663.798	590.174	845.457	869.48	1058.45	1155.76	1081.04	1324.68
FBgn0266241	0	2.00847	0	1.16912	0	0	0	0	0.862076	0.834759	0	1.27117	0	4.1664	2.67915	0.998253
FBgn0262362	6.8812	36.1524	4.28145	5.84561	7.10744	4.31207	5.45847	5.53408	18.9657	24.208	4.83809	11.4405	6.04827	32.4979	1.33958	22.9598
FBgn0263596	0	0	0	0	0	0	0	0	0	0	0	0	0	0	0	0
FBgn0262363	0	0	0	0	0	0	0	0	0	0	0	0	1.51207	0	0	0
FBgn0037546	64.2245	27.1143	82.4179	72.4856	34.6488	41.3958	69.8684	43.1658	45.69	47.5812	64.1047	54.6603	67.2871	58.3296	87.0724	79.8602
FBgn0086052	0	0	0	0	0	0	0	0	0	0	0	0	0	0	0	0
FBgn0037547	5363.9	4193.68	5307.93	4650.77	3380.48	3390.15	3824.21	3211.98	3390.54	3324.84	4189.79	3502.07	3765.05	3563.94	4513.03	3333.17
FBgn0265418	2.29373	5.02117	1.07036	0	1.77686	1.72483	1.09169	1.10682	1.72415	2.50428	0	2.54234	2.2681	3.33312	1.33958	1.99651
FBgn0037548	397.963	368.554	263.309	245.516	467.314	420.858	360.259	395.133	188.795	208.69	107.648	101.694	314.51	359.144	204.955	249.563
FBgn0243512	699.589	648.735	741.761	700.304	758.72	860.688	878.814	742.674	939.663	763.804	788.609	702.957	926.142	891.61	774.275	670.826
FBgn0265419	12.6155	16.0677	9.63326	8.18385	9.77273	13.7986	9.82525	9.96135	10.3449	21.7037	3.62857	3.81351	15.8767	24.1651	8.03745	9.98253
FBgn0037549	1679.01	1339.65	1579.86	1688.21	1409.05	1463.51	1425.75	1579.43	1397.42	1582.7	1524	1661.42	1388.08	1124.09	1545.87	1451.46
FBgn0037550	253.458	542.286	235.48	247.854	371.364	378.599	274.015	234.645	436.21	407.362	256.419	277.115	226.054	329.146	217.011	236.586
FBgn0037551	1029.89	1205.08	812.405	762.268	1085.66	1127.17	758.728	760.383	1368.11	1099.38	747.486	791.939	972.26	1122.43	758.2	760.669
FBgn0051583	0	0	0	0	0	0	0	0	0	0	0	0	0	0	0	0
FBgn0011963	0	0	0	0	0	0	0	0	0	0	0	0	0	0	0	0
FBgn0011962	0	0	0	0	0	0	0	0	0	0	0	0	0	0	0	0
FBgn0011961	0	0	0	0	0	0	0	0	0	0	0	0	0	0	0	0
FBgn0011960	0	0	0	0	0	0	0	0	0	0	0	0	0	0	0	0
FBgn0011959	0	0	0	0	0	0	0	0	0	0	0	0	0	0	0	0
FBgn0001138	56.1965	43.182	32.1109	21.0442	53.3058	47.4327	17.4671	15.4954	23.276	45.9117	26.6095	15.254	46.1181	47.497	38.8477	18.9668
FBgn0262994	0	0	0	0	0	0	2.18339	0	0.862076	2.50428	0	0	0	0	0	0
FBgn0262995	0	0	0	0	0	0	0	0	0	0	0	0	0	0	0	0
FBgn0261290	36.6997	62.2625	20.3369	25.7207	55.0827	53.4696	16.3754	18.8159	50.8625	49.2508	31.4476	27.9657	42.3379	73.3287	30.8102	36.9354
FBgn0037552	381.907	253.067	383.19	342.553	260.31	281.147	336.242	348.647	267.243	277.14	360.438	347.029	345.508	270.816	294.707	403.294
FBgn0037553	220.198	316.334	268.661	216.288	258.533	219.053	230.348	292.199	263.795	218.707	229.809	251.692	309.974	366.643	211.653	315.448
FBgn0267111	0	0	0	0	0	0	1.09169	0	0	0	0	0	0	0	1.33958	0
FBgn0267110	0	0	0	0	1.77686	0.862413	3.27508	0	0	0	2.41905	0	0	0	1.33958	0
FBgn0267109	2.29373	4.01693	1.07036	1.16912	2.66529	1.72483	1.09169	0	0.862076	4.17379	4.83809	1.27117	4.53621	0	1.33958	0
FBgn0037554	280.982	241.016	396.034	385.81	334.05	279.422	445.411	370.783	337.934	282.983	445.105	366.097	326.607	246.651	440.72	406.289
FBgn0037555	862.444	1022.31	1178.47	1156.26	1117.65	1185.82	1284.92	1293.87	1329.32	995.867	1236.13	1315.66	995.697	924.941	1095.77	1128.03
FBgn0037556	617.014	416.757	591.911	588.068	494.856	569.193	647.375	622.031	499.142	494.177	662.819	638.127	519.396	460.804	577.357	553.032
FBgn0042182	0	0	0	0	0	0	0	0	0	0	0	0	0	0	0	0
FBgn0064126	0	0	0	0	0	0	0	0	0	0	0	0	0	0	0	0
FBgn0040528	21.7905	28.1185	23.548	11.6912	26.6529	16.3858	17.4671	29.884	11.207	21.7037	19.3524	19.0676	24.9491	24.9984	14.7353	11.979
FBgn0260386	126.155	78.3302	116.67	121.589	90.6199	97.4527	115.72	99.6135	94.8283	101.006	108.857	104.236	140.622	137.491	123.241	110.806
FBgn0037560	330.298	512.159	193.736	196.412	399.794	395.848	200.872	133.925	404.314	411.536	227.39	195.76	282.757	465.804	199.597	182.68
FBgn0010173	2127.44	2596.95	2317.34	2289.14	3211.68	3123.66	3150.63	3082.48	3068.13	2491.75	2450.49	2351.66	2380	2713.16	2294.69	2711.25
FBgn0014861	1096.4	962.056	1629.09	1616.9	1095.43	1156.5	1978.15	1654.69	1565.53	1184.52	1892.9	1802.52	1143.88	919.108	1606.15	1861.74
FBgn0037561	506.915	532.244	438.849	451.281	511.736	493.3	493.446	492.533	482.762	501.69	506.79	512.282	394.65	342.478	496.982	432.243
FBgn0010433	1.14687	1.00423	1.07036	1.16912	0.88843	0	0	0	0.862076	0	0	1.27117	0.756034	0	0	0
FBgn0265377	8.02807	18.0762	7.49254	9.35298	13.3265	18.9731	12.0086	11.0682	9.48283	9.18234	1.20952	3.81351	15.1207	16.6656	20.0936	9.98253
FBgn0037562	98.6305	120.508	77.0661	73.6547	143.926	129.362	58.9515	66.409	99.1387	131.892	52.0095	52.118	188.253	232.485	95.1099	46.9179
FBgn0037563	591.783	746.146	524.478	440.759	657.439	544.183	409.385	399.561	614.66	564.297	535.819	476.689	560.221	763.285	470.191	426.254
FBgn0051464	0	0	1.07036	0	3.55372	0.862413	1.09169	1.10682	0	0.834759	0	1.27117	0	0	0	0.998253
FBgn0051463	208.73	184.779	223.706	194.074	215	278.559	255.457	273.384	136.208	176.134	205.619	198.303	256.296	250.817	263.896	248.565
FBgn0037565	652.567	337.422	789.928	736.547	629.009	739.088	885.364	1011.63	485.349	616.052	961.571	738.55	854.319	628.293	913.59	643.873
FBgn0037566	792.485	938.958	864.853	936.467	877.769	950.379	828.596	920.871	901.731	889.853	847.876	959.733	717.477	758.285	955.117	877.464
FBgn0265351	137.624	116.491	149.851	149.648	137.707	144.885	169.213	187.052	118.104	123.544	181.429	177.964	147.427	119.159	128.599	141.752
FBgn0265101	935.843	1809.63	616.529	604.436	1399.28	1317.77	741.261	671.837	1562.08	1324.76	664.028	615.246	818.785	1367.41	633.619	752.683
FBgn0037569	161.708	252.063	218.354	249.023	195.455	180.244	197.597	262.315	203.45	212.029	214.086	232.624	158.011	167.489	183.522	215.623
FBgn0263550	0	0	0	0	0	0	0	0	0	0	0	0	0	0	0	0
FBgn0037570	2.29373	2.00847	1.07036	3.50737	0	4.31207	2.18339	1.10682	0.862076	2.50428	2.41905	1.27117	1.51207	0	1.33958	1.99651
FBgn0037571	0	0	0	0	0	0	0	0	0	0	0	0	0	0	1.33958	0
FBgn0037572	0	0	0	0	0.88843	0	1.09169	0	0	0	0	0	0	0	0	0
FBgn0037573	1217.97	1331.61	1299.42	1321.11	1234.03	1147.87	1196.5	1454.36	1131.91	1202.05	1121.23	1280.07	994.941	956.606	1075.68	1117.04
FBgn0037574	214.464	165.699	252.606	226.81	203.451	177.657	242.356	264.529	167.243	146.918	245.533	266.946	178.424	169.989	233.086	265.535
FBgn0266742	20.6436	32.1355	14.9851	21.0442	25.7645	22.4227	12.0086	17.7091	28.4485	47.5812	18.1429	16.5252	30.9974	64.9959	14.7353	26.9528
FBgn0062412	145.652	919.878	137.006	326.185	187.459	746.85	102.619	199.227	329.313	1600.23	475.343	427.113	331.143	1965.71	365.704	823.559
FBgn0003129	72.2526	46.1947	58.8699	46.7649	45.31	59.5065	64.41	42.059	41.3796	61.7721	52.0095	48.3045	65.019	73.3287	46.8851	54.9039
FBgn0037576	1.14687	1.00423	1.07036	3.50737	0	0.862413	2.18339	3.32045	0	2.50428	0	2.54234	1.51207	2.49984	5.3583	0
FBgn0037577	1464.55	2406.14	1285.51	1302.4	1908.35	2018.05	1495.62	1386.84	1494.84	1552.65	1173.24	1105.92	1621.69	2375.68	1561.94	1333.67
FBgn0040529	5601.3	10509.3	4910.82	4967.6	7513.46	7311.54	4970.48	5256.27	6290.57	6716.47	3892.25	4505.03	5480.49	7532.02	5001.97	4888.44
FBgn0004908	223.639	384.621	201.228	171.861	271.86	256.137	189.955	206.975	307.761	318.043	203.2	213.557	174.644	267.483	144.674	179.686
FBgn0037578	297.038	249.05	290.068	296.957	286.963	275.972	314.408	302.161	347.417	313.869	382.209	373.724	269.904	274.982	356.327	335.413
FBgn0037579	2.29373	0	1.07036	0	1.77686	3.44965	2.18339	2.21363	2.58623	0.834759	0	1.27117	1.51207	2.49984	0	0
FBgn0037580	3963.57	3363.18	5137.74	5352.24	3522.63	3649.73	4926.82	5587.21	3336.23	3395.8	3921.28	4808.84	3244.14	2625.67	3899.5	4558.02
FBgn0037581	44.7278	42.1778	31.0405	28.0589	77.2934	54.332	49.1263	45.3795	39.6555	25.0428	32.6571	24.1522	39.3138	26.665	37.5081	42.9249
FBgn0261108	975.984	693.925	1167.77	1062.73	759.608	808.943	1126.63	1065.86	956.042	811.385	1292.98	1433.88	1018.38	737.453	1010.04	1166.96
FBgn0020249	1614.79	1665.02	1571.29	1696.4	1546.76	1596.33	1587.32	1597.14	1678.46	1692.06	1786.47	1717.35	1726.78	1722.39	1784.31	1635.14
FBgn0037583	620.455	619.612	839.164	814.878	545.496	570.917	1004.36	850.035	646.557	570.975	826.105	924.141	523.176	459.137	726.05	802.595
FBgn0037584	0	0	0	0	0	0	0	0	0	0	0	0	0	0	0	0
FBgn0266801	470.215	176.745	376.768	342.553	314.504	378.599	373.36	354.181	256.899	287.992	406.4	316.521	439.256	334.979	385.798	329.423
FBgn0037589	3.4406	0	0	1.16912	0	0	0	2.21363	0	0.834759	0	0	0	0	1.33958	0
FBgn0037590	3.4406	7.02964	0	1.16912	3.55372	0.862413	3.27508	1.10682	5.17245	1.66952	1.20952	3.81351	0	2.49984	5.3583	3.99301
FBgn0037591	2.29373	0	1.07036	0	0.88843	0.862413	1.09169	0	0.862076	0	0	0	0	0.83328	1.33958	0
FBgn0037592	906.025	910.84	950.482	906.07	979.05	875.349	982.525	887.667	1031.04	995.867	985.762	1002.95	952.603	999.103	886.799	1087.1
FBgn0051454	49.3153	39.1651	32.1109	30.3972	33.7604	45.7079	31.6591	27.6704	40.5176	36.7294	44.7524	20.3387	47.6302	36.6643	56.2622	21.9616
FBgn0051259	339.473	114.483	347.868	445.435	180.351	185.419	426.853	460.436	33.621	220.376	430.59	275.844	303.17	211.653	878.761	384.327
FBgn0040531	48.1684	55.2328	27.8294	26.8898	33.7604	30.1845	22.9256	16.6022	7.75868	57.5983	31.4476	20.3387	50.6543	66.6624	61.6205	39.9301
FBgn0267135	0	0	1.07036	0	0	0	0	0	0	0	0	0	0	0	0	0
FBgn0267134	0	0	0	0	0	0	0	0	0	0	0	1.27117	0	0	0	0
FBgn0037594	0	1.00423	1.07036	1.16912	0.88843	5.17448	1.09169	1.10682	0	0.834759	1.20952	6.35585	0	0.83328	4.01873	0.998253
FBgn0051453	592.93	992.183	720.354	772.79	879.546	884.836	906.106	771.451	1016.39	800.534	722.086	798.295	570.806	685.79	582.715	799.6
FBgn0051450	553.937	1393.88	507.352	558.84	931.075	821.88	413.752	480.358	1127.6	1078.51	553.962	552.959	521.664	953.273	523.774	440.229
FBgn0051460	107.805	207.876	114.529	141.464	149.256	164.721	135.37	110.682	131.036	143.578	123.371	115.676	95.2603	122.492	103.147	115.797
FBgn0265318	10.3218	19.0804	8.5629	11.6912	16.8802	11.2114	4.36678	2.21363	20.6898	18.3647	10.8857	7.62702	5.29224	11.6659	12.0562	3.99301
FBgn0266916	761.519	465.964	1197.74	1174.97	704.525	676.132	1441.04	1235.21	876.731	671.981	1323.22	1436.42	752.254	466.637	999.323	1388.57
FBgn0261929	44.7278	23.0974	46.0256	32.7354	43.5331	34.4965	32.7508	39.8454	25.8623	22.5385	70.1524	38.1351	44.606	32.4979	41.5268	33.9406
FBgn0026399	1.14687	5.02117	4.28145	0	2.66529	6.03689	5.45847	2.21363	2.58623	1.66952	1.20952	6.35585	4.53621	4.1664	1.33958	0.998253
FBgn0012028	0	0	0	0	0	0	0	0	0	0	0	0	0	0	0	0
FBgn0012027	1.14687	2.00847	3.21109	1.16912	0	0.862413	0	0	0	0	0	0	0.756034	0	0	0.998253
FBgn0037601	166.296	142.601	150.921	136.787	121.715	123.325	137.554	118.429	140.518	115.197	135.467	133.473	145.915	170.822	141.995	124.782
FBgn0024326	1589.56	1592.71	1417.16	1568.96	1552.09	1635.14	1522.91	1426.69	1876.74	1755.5	1589.31	1610.57	1533.24	1499.9	1398.52	1580.23
FBgn0037602	57.3433	134.567	64.2218	47.934	98.6158	112.114	65.5017	70.8362	59.4832	51.755	48.3809	68.6432	73.3353	102.493	68.3183	70.8759
FBgn0000447	1003.51	1082.56	1187.03	1185.49	997.707	964.178	1137.55	1188.72	1084.49	1095.2	1146.63	1259.73	928.41	847.446	1190.88	1091.09
FBgn0037603	279.835	430.816	270.802	285.266	371.364	336.341	328.6	336.472	391.382	346.425	290.286	258.048	295.609	344.145	313.461	288.495
FBgn0259992	74.5463	110.466	57.7996	61.9635	86.1778	82.7917	64.41	54.234	82.7593	88.4844	47.1714	71.1855	69.5552	97.4938	77.6954	62.8899
FBgn0263231	6925.93	5495.17	7451.86	7766.48	6656.12	7085.59	7241.21	7702.33	7015.57	7826.7	7085.39	8108.79	6526.84	5442.15	6700.56	6748.19
FBgn0086679	627.336	486.049	721.424	683.936	487.748	578.679	706.326	716.11	510.349	477.482	689.428	767.787	615.412	498.302	726.05	768.655
FBgn0037606	580.315	453.914	657.203	676.922	519.732	537.283	787.112	732.712	486.211	495.847	610.809	654.653	487.642	423.306	563.961	592.962
FBgn0037607	9390.54	8362.25	13261.8	13545.4	8437.42	9311.47	12279.4	13545.2	9583.7	8946.94	11095	12738.4	9779.3	8636.12	10870.7	14632.4
FBgn0012026	1.14687	0	0	0	0.88843	0	0	0	0	0	0	0	0.756034	0	0	0
FBgn0012025	0	0	0	0	0	0	1.09169	0	0	0	0	0	0	0	0	0
FBgn0012024	0	0	0	1.16912	0	0	0	0	0	0	0	0	0	0	0	0
FBgn0037608	611.28	773.26	545.885	607.943	742.728	708.904	592.79	602.108	773.282	653.616	573.314	531.349	497.471	648.292	515.737	556.027
FBgn0037609	279.835	350.478	324.32	261.883	318.058	325.992	347.159	312.122	337.072	323.052	298.752	277.115	292.585	279.982	283.99	295.483
FBgn0037610	235.108	308.3	277.224	333.2	300.289	260.449	349.342	346.433	286.209	272.966	309.638	352.114	260.076	259.983	330.875	326.429
FBgn0037611	114.687	241.016	112.388	111.067	137.707	128.5	123.361	121.75	157.76	148.587	116.114	134.744	129.282	142.491	125.92	112.803
FBgn0053325	0	0	0	0	0	0	0	0	0	0	1.20952	0	0	0	0	0
FBgn0266242	0	0	0	0	0	0	0	0	0	0	0	0	0	0	0	0
FBgn0265158	0	0	0	0	0	0	0	0	0	0	0	0	0	0	0	0
FBgn0001180	527.559	303.279	801.702	854.628	357.149	424.307	931.215	882.132	467.245	440.753	872.066	926.683	517.128	312.48	715.333	867.482
FBgn0037613	762.666	978.124	588.699	633.664	947.067	793.42	680.126	640.847	686.212	898.2	549.124	613.975	777.203	860.778	596.111	596.955
FBgn0037612	509.209	662.794	852.009	711.995	609.463	672.682	760.911	741.567	768.972	580.992	674.914	746.177	671.359	605.795	803.745	746.693
FBgn0037614	823.45	791.336	938.708	963.357	974.608	1024.55	1177.94	976.212	1272.42	1000.04	948.266	1022.02	808.201	708.288	835.895	958.323
FBgn0037615	30.9654	37.1566	41.7441	40.9193	40.8678	59.5065	43.6678	63.0885	43.1038	50.9203	30.2381	48.3045	51.4103	62.496	42.8664	50.9109
FBgn0037616	43.5809	44.1863	47.096	47.934	28.4298	23.2852	28.3841	30.9909	52.5866	62.6069	62.8952	86.4396	42.3379	52.4967	80.3745	76.8655
FBgn0037617	159.414	162.686	133.795	121.589	118.161	124.187	76.4186	68.6226	213.795	232.898	212.876	175.421	137.598	151.657	171.466	120.789
FBgn0037618	3.4406	2.00847	1.07036	0	0.88843	0	1.09169	0	0.862076	0	0	1.27117	0	0	1.33958	0
FBgn0037619	110.099	122.517	86.6994	90.0224	133.265	112.114	110.261	88.5453	134.484	131.057	122.162	108.049	120.209	98.3271	95.1099	105.815
FBgn0037620	143.358	233.986	100.614	101.714	200.785	158.684	118.995	107.361	247.416	205.351	128.209	102.965	112.649	188.321	128.599	112.803
FBgn0037621	479.39	598.523	383.19	439.59	535.724	548.495	410.477	442.726	517.245	554.28	394.305	377.538	459.669	509.967	425.985	385.326
FBgn0037622	407.138	309.304	429.215	447.774	345.599	349.277	474.887	444.94	371.555	344.755	489.857	467.791	350.044	272.483	468.851	422.261
FBgn0037623	586.049	388.638	604.755	588.068	437.108	447.592	585.148	570.01	455.176	420.718	670.076	575.84	596.511	441.639	585.394	607.936
FBgn0037624	2532.28	3287.86	2827.9	2678.46	3249.88	3616.96	3040.37	2781.43	4357.79	3572.77	2884.71	2872.84	2380	2761.49	2368.37	2653.36
FBgn0083971	0	0	0	0	0	0	0	0	0	0	0	0	0	0	0	0
FBgn0037625	0	0	3.21109	0	0	0.862413	0	0	0	0.834759	2.41905	1.27117	0.756034	0.83328	1.33958	0
FBgn0265159	1.14687	0	0	0	0	0	0	0	0	0	0	0	0	0	0	0
FBgn0037626	1.14687	2.00847	2.14073	1.16912	2.66529	0.862413	0	1.10682	0.862076	1.66952	3.62857	1.27117	1.51207	3.33312	1.33958	2.99476
FBgn0037627	276.395	388.638	288.998	188.229	269.194	212.154	215.064	219.15	312.934	312.2	309.638	235.166	319.047	359.144	403.212	282.506
FBgn0085330	76.8401	154.652	40.6738	52.6105	102.169	123.325	45.8512	76.3703	37.0693	46.7465	25.4	31.7793	59.7267	95.8272	38.8477	61.8917
FBgn0046874	4.58747	1.00423	4.28145	2.33824	1.77686	3.44965	5.45847	1.10682	6.03453	3.33903	0	10.1694	9.07241	14.1658	4.01873	4.99126
FBgn0261015	17.203	13.055	19.2665	29.228	31.0951	37.0838	45.8512	48.6999	9.48283	5.00855	16.9333	13.9829	21.925	14.999	28.1311	33.9406
FBgn0053191	10.3218	2.00847	3.21109	7.01473	2.66529	6.03689	8.73356	7.74771	0	2.50428	0	6.35585	4.53621	9.16608	5.3583	2.99476
FBgn0053189	10.3218	6.0254	11.774	9.35298	20.4339	18.9731	24.0173	22.1363	6.03453	8.34759	7.25714	7.62702	10.5845	13.3325	17.4145	7.98602
FBgn0037630	1.14687	2.00847	0	1.16912	0.88843	2.58724	0	1.10682	0.862076	1.66952	2.41905	1.27117	2.2681	0	2.67915	0.998253
FBgn0037632	4586.32	6113.77	5336.83	5598.93	5544.69	5714.35	5163.71	5819.64	6450.05	5807.42	4967.51	5444.42	4360.05	4167.23	4742.1	4887.45
FBgn0037633	279.835	228.965	293.279	239.67	235.434	296.67	304.583	335.365	244.83	257.94	333.828	321.606	247.223	185.821	344.271	270.527
FBgn0037634	145.652	257.084	131.655	116.912	216.777	212.154	102.619	118.429	250.002	217.037	135.467	119.49	120.965	179.989	88.412	110.806
FBgn0037635	728.26	1128.76	526.618	592.745	621.013	560.569	377.726	474.824	643.971	784.673	451.152	452.537	430.184	684.956	401.873	521.088
FBgn0037636	5706.81	3991.83	6893.14	6531.88	3993.49	4523.36	7089.46	6546.82	5439.7	4132.06	7624.84	7321.94	5776.1	3456.45	5623.54	6577.49
FBgn0262604	1.14687	0	0	0	0.88843	0	0	0	0	0	3.62857	3.81351	1.51207	0	0	0.998253
FBgn0040532	1381.97	2795.79	1120.67	1069.75	1673.8	1566.14	969.425	1020.48	1411.22	1549.31	872.066	889.819	1256.53	2199.86	985.927	1100.07
FBgn0037637	2835.05	4662.66	2192.1	2217.82	3841.57	3505.71	2463.95	2251.26	3428.48	3422.51	2358.57	2061.84	2885.78	4378.05	2644.32	2398.8
FBgn0037638	737.435	626.642	768.52	763.437	680.538	679.582	811.129	826.792	693.971	704.536	804.333	758.889	732.597	647.459	764.898	835.538
FBgn0262614	4675.78	2271.58	5152.73	5040.08	3927.75	3969.69	5142.97	5186.54	3309.51	3547.72	4978.4	4929.6	4574.76	3532.27	5012.69	4582.98
FBgn0011966	0	0	0	0	0	0	0	0	0	0	0	0	0	0	0	0
FBgn0053551	0	0	0	0	0	0	0	0	0	0	0	0	0	0	0	0
FBgn0264790	21.7905	35.1482	8.5629	7.01473	29.3182	31.9093	13.1003	28.7772	39.6555	23.3732	12.0952	15.254	15.8767	19.1654	14.7353	7.98602
FBgn0003015	11409	10019.2	14216.6	14760.2	10778.4	11840.9	14697.5	15486.6	12688	10761.7	15236.4	16250.6	11323.9	6751.24	13225.6	12743.7
FBgn0037643	13840.4	10205	13182.6	13212.2	9947.76	10904.4	12690.9	13004	12218.2	11131.5	13974.8	15996.4	14968.7	12044.2	13490.9	15394.1
FBgn0037644	682.386	754.179	662.554	727.194	778.265	796.007	769.645	832.326	860.352	708.71	755.952	772.871	666.822	557.464	731.408	662.84
FBgn0037645	5.73433	6.0254	0	5.84561	6.21901	5.17448	6.55017	3.32045	4.31038	0.834759	3.62857	8.89819	3.78017	3.33312	4.01873	2.99476
FBgn0037646	313.095	272.147	237.62	275.913	272.748	244.063	252.181	293.306	276.726	253.767	221.343	238.98	304.682	300.814	231.747	283.504
FBgn0037647	426.634	334.41	496.648	472.325	386.467	357.901	542.572	571.117	377.589	332.234	515.257	589.823	475.546	338.312	452.776	554.03
FBgn0027503	595.224	288.215	797.42	853.459	405.124	453.629	841.696	854.462	429.314	411.536	873.276	888.548	554.173	359.144	809.104	759.67
FBgn0260243	760.373	1009.25	859.501	772.79	1042.13	992.637	925.757	732.712	1446.56	1025.08	913.19	896.175	733.353	814.948	793.029	896.431
FBgn0037648	502.328	587.477	469.889	488.693	544.608	585.578	435.586	457.115	650.005	563.462	460.828	447.452	498.227	534.966	505.02	476.167
FBgn0051100	431.222	302.274	344.657	292.28	387.356	372.562	332.967	281.131	268.968	317.208	297.543	269.488	387.09	379.976	344.271	371.35
FBgn0037650	0	0	0	0	0	0	0	0	0	0	0	0	0	0	0	0
FBgn0037652	1556.3	2129.98	1367.92	1356.18	1810.62	1733.45	1482.52	1404.55	1932.77	1811.43	1322.01	1358.88	1212.68	1467.41	1133.28	1279.76
FBgn0026380	1736.36	1948.21	2207.09	2181.58	1916.34	2047.37	2636.44	2666.32	1681.91	1549.31	1895.32	2082.18	1778.19	1892.38	1977.21	2549.54
FBgn0037653	742.023	797.361	687.173	639.51	875.104	810.668	723.793	772.558	881.041	863.14	747.486	718.211	706.892	754.119	789.01	710.756
FBgn0037654	18.3499	14.0593	12.8444	10.5221	14.2149	9.48654	14.192	8.85453	12.9311	9.18234	13.3048	11.4405	12.8526	10.8326	6.69788	17.9686
FBgn0037655	4176.89	4278.04	3890.77	3908.37	4102.77	3954.16	3620.06	3587.19	4677.62	4540.25	3963.61	3946.98	3878.46	4058.07	3995.95	3827.3
FBgn0040534	378.466	484.041	218.354	220.964	441.55	451.042	291.482	213.616	509.487	419.884	226.181	188.133	264.612	365.81	203.615	222.61
FBgn0037656	202.995	328.384	179.821	189.398	311.839	290.633	208.514	213.616	293.106	245.419	251.581	241.522	201.105	246.651	162.089	227.602
FBgn0264075	925.521	573.417	982.593	1072.08	724.959	761.511	1069.86	1115.67	742.247	735.422	1139.37	1048.72	885.316	641.626	949.759	1075.12
FBgn0002932	399.11	283.194	439.919	439.59	319.835	383.774	522.922	410.629	393.107	301.348	437.848	452.537	361.384	263.317	400.533	381.333
FBgn0063298	0	0	0	0	0.88843	0	0	1.10682	0.862076	0	0	0	0	0	0	0
FBgn0037657	901.437	755.184	885.19	896.717	797.811	865	847.155	847.821	881.041	847.28	887.79	856.769	845.246	764.951	746.143	852.508
FBgn0010222	850.975	1357.72	798.491	848.783	1330.87	1529.06	1034.93	1175.44	1029.32	950.79	601.133	734.736	1269.38	1334.08	910.911	769.653
FBgn0014018	1937.06	1050.43	2067.94	1962.96	1172.73	1502.32	2081.86	2252.37	1450.87	1326.43	1941.29	2019.89	2012.56	1350.75	2326.84	1769.9
FBgn0028708	292.451	339.431	298.631	340.214	384.69	377.737	362.443	345.327	375.003	333.069	309.638	348.301	285.781	329.146	305.423	348.39
FBgn0037659	1143.43	562.371	1415.02	1497.65	929.298	960.728	1430.12	1524.09	826.731	827.246	1503.44	1608.03	1041.82	658.291	1292.69	1274.77
FBgn0037660	401.403	526.218	409.949	390.487	501.963	508.824	422.486	411.736	556.039	502.525	407.609	429.655	390.87	479.136	403.212	371.35
FBgn0037661	89.4556	112.474	70.6439	90.0224	76.405	100.04	96.0691	66.409	115.518	86.8149	64.1047	88.9819	67.2871	102.493	76.3558	90.841
FBgn0003165	2005.87	1513.38	3106.19	3328.49	1748.43	1853.33	3585.12	3311.59	2003.46	1873.2	3563.26	3582.16	2370.17	1496.57	3004.67	3243.32
FBgn0037662	1.14687	2.00847	0	0	0	1.72483	0	0	0.862076	0.834759	0	3.81351	0.756034	0.83328	0	0.998253
FBgn0266706	1.14687	5.02117	0	2.33824	1.77686	0.862413	1.09169	0	0.862076	3.33903	3.62857	1.27117	3.02414	1.66656	0	1.99651
FBgn0000412	3363.76	4541.14	2758.32	2642.22	4045.91	4230.14	2852.6	2723.87	4790.56	4393.33	2683.93	2749.54	2864.61	3305.62	2447.4	2537.56
FBgn0260935	667.476	403.702	719.284	702.642	570.372	566.605	652.833	758.169	540.522	555.949	677.333	724.567	686.479	553.298	661.75	635.887
FBgn0037664	193.82	261.101	278.294	256.038	228.327	209.566	260.915	256.781	324.141	301.348	264.886	293.64	168.596	160.823	207.634	270.527
FBgn0037665	17.203	19.0804	5.35181	5.84561	18.657	16.3858	6.55017	11.0682	1.72415	7.51283	3.62857	3.81351	3.78017	12.4992	2.67915	3.99301
FBgn0037666	0	0	0	0	0	0.862413	1.09169	0	0	0	1.20952	0	0	0	0	0
FBgn0037667	177.764	154.652	230.128	243.177	161.694	199.217	260.915	282.238	200.864	174.465	250.371	235.166	167.84	144.991	227.728	209.633
FBgn0037668	0	2.00847	1.07036	1.16912	0.88843	0.862413	0	0	0.862076	1.66952	0	2.54234	0	0	0	0.998253
FBgn0037669	173.177	462.952	181.962	191.736	272.748	256.137	229.256	168.236	299.14	288.826	168.124	180.506	161.791	256.65	176.824	179.686
FBgn0037670	118.127	127.538	150.921	129.773	114.608	112.114	136.462	111.788	102.587	121.04	140.305	133.473	114.917	94.1607	97.789	102.82
FBgn0037671	5807.73	6397.97	5834.55	6163.61	5820.11	5648.81	5160.44	5603.81	5540.56	6159.68	5094.51	5412.64	5854.73	6368.76	6257.16	5731.97
FBgn0037672	72.2526	73.3091	41.7441	47.934	79.9587	79.342	60.0432	64.1953	45.69	55.0941	43.5428	48.3045	61.2388	53.3299	41.5268	58.8969
FBgn0010803	998.921	1269.35	1018.99	1040.52	1313.99	1211.69	1215.06	1176.55	1164.66	1109.39	977.295	1113.54	950.335	1004.1	912.251	1109.06
FBgn0261241	646.833	618.608	816.687	787.988	583.699	608.864	836.238	826.792	706.04	649.442	836.99	807.193	672.871	614.961	691.221	783.628
FBgn0037676	253.458	162.686	105.966	108.728	185.682	190.593	113.536	98.5066	162.07	151.091	124.581	92.7954	212.446	183.322	121.901	96.8305
FBgn0037675	0	0	0	1.16912	0	0	0	0	1.72415	0	1.20952	1.27117	0	0	0	0
FBgn0037677	1.14687	0	1.07036	0	0	0	0	0	0	0	1.20952	0	0	0.83328	1.33958	0
FBgn0037678	1443.91	2284.63	1459.97	1567.79	1641.82	1564.42	1247.81	1403.44	1681.91	1868.19	1428.45	1796.16	1700.32	2744.82	1920.95	1898.68
FBgn0037679	369.291	437.846	419.582	441.928	454.876	408.784	387.552	465.97	492.245	426.562	440.267	430.927	383.309	372.476	412.589	420.264
FBgn0037680	539.027	687.9	482.734	443.097	695.641	642.498	533.839	498.067	706.902	651.946	528.562	484.316	575.342	533.299	458.135	481.158
FBgn0262993	83.7213	115.487	65.2921	44.4266	87.9546	104.352	65.5017	65.3022	123.277	113.527	54.4286	61.0162	86.944	98.3271	37.5081	57.8987
FBgn0266410	5743.51	3638.34	5482.4	4958.25	4042.36	4436.25	6008.69	5106.85	4667.28	4051.92	6256.87	5539.76	5546.27	4143.9	4940.35	5513.35
FBgn0086053	0	1.00423	0	0	0	0	0	0	0	0	0	0	0.756034	0	0	0
FBgn0086054	0	0	0	0	0.88843	1.72483	0	0	2.58623	0.834759	0	1.27117	0.756034	0	0	0.998253
FBgn0263750	2.29373	4.01693	3.21109	1.16912	1.77686	2.58724	2.18339	4.42726	5.17245	3.33903	3.62857	2.54234	5.29224	0.83328	6.69788	5.98952
FBgn0037683	279.835	248.046	217.284	219.795	261.199	224.227	189.955	244.606	195.691	214.533	159.657	252.963	223.786	280.815	172.805	244.572
FBgn0037684	308.507	380.605	248.324	320.339	494.856	419.133	339.517	418.377	391.382	291.331	210.457	292.369	356.092	723.287	259.878	557.025
FBgn0000723	1727.18	1372.79	1405.39	1370.21	1938.56	1830.04	1759.81	1648.05	1212.08	1299.72	1278.47	1194.9	1649.67	1586.57	1588.74	1331.67
FBgn0037685	0	5.02117	2.14073	1.16912	0.88843	2.58724	3.27508	1.10682	2.58623	2.50428	3.62857	2.54234	2.2681	6.66624	1.33958	2.99476
FBgn0083953	436.956	1188.01	407.808	360.09	668.988	586.441	324.233	301.054	917.249	868.149	429.381	420.757	451.353	754.119	423.306	381.333
FBgn0037686	8008.57	13773.1	8131.54	8625.78	12210.6	11126.9	7729.2	8550.15	12123.4	12681.7	7503.88	8439.3	9250.08	9462.73	10515.7	8396.3
FBgn0037687	503.474	623.629	480.593	485.186	468.203	501.062	473.795	488.106	509.487	500.855	451.152	474.146	430.94	509.134	447.418	488.146
FBgn0037688	497.74	700.955	432.426	450.112	563.265	561.431	456.328	444.94	672.419	564.297	535.819	443.638	411.283	516.634	448.758	427.252
FBgn0037689	0	0	0	0	0	0	0	0	0	0	0	0	0	0	0	0
FBgn0260237	0	0	0	0	0	0	0	0	0	0	0	0	0	0	0	0
FBgn0265201	0	0	0	0	0.88843	0	0	0	0	0	0	0	0	0	0	0
FBgn0003889	5.73433	2.00847	1.07036	3.50737	5.33058	1.72483	4.36678	3.32045	5.17245	0.834759	3.62857	3.81351	0.756034	3.33312	2.67915	2.99476
FBgn0037690	52.7559	80.3387	53.5181	46.7649	63.0786	65.5434	51.3096	42.059	60.3453	52.5898	54.4286	58.4738	84.6758	72.4954	38.8477	53.9057
FBgn0011740	504.621	377.592	769.591	743.562	449.546	509.686	832.963	796.908	409.486	459.952	805.543	790.668	506.543	354.144	712.654	782.63
FBgn0261552	6331.85	2794.78	5855.95	5784.82	3697.65	3763.57	5294.72	5114.6	3222.44	3384.11	6135.91	5867.72	6365.81	4002.24	5103.78	5811.83
FBgn0037696	219.052	323.363	272.942	258.376	170.579	216.466	220.522	232.431	321.554	303.852	354.39	324.148	235.883	244.984	277.292	273.521
FBgn0037697	307.36	344.452	226.917	169.523	353.595	319.093	212.88	200.334	327.589	366.459	217.714	246.607	347.02	404.974	265.236	220.614
FBgn0037698	591.783	243.025	587.629	569.362	318.947	405.334	618.991	589.933	286.209	342.251	656.771	572.027	672.871	410.807	614.865	574.994
FBgn0266730	0	2.00847	0	1.16912	0	0.862413	0	3.32045	0.862076	3.33903	0	0	0.756034	2.49984	0	0
FBgn0043791	29.8185	47.199	148.78	139.126	84.4009	86.2413	89.5189	69.7294	225.002	181.143	142.724	207.201	81.6517	191.654	202.276	129.773
FBgn0014380	1165.22	1247.26	712.861	749.407	1112.31	990.05	689.951	764.81	831.041	985.85	656.771	654.653	1012.33	1162.43	665.769	675.817
FBgn0037700	787.897	1363.75	744.972	745.9	1106.98	1050.42	721.61	711.683	1317.25	1150.3	720.876	725.838	714.452	1009.1	661.75	721.737
FBgn0267790	2002.43	1809.63	2123.6	2311.35	1935	1955.09	2279.46	2326.53	1771.57	1828.12	1959.43	2049.13	1788.02	1519.9	1816.46	2076.37
FBgn0003205	2041.42	2687.33	1785.36	1685.87	2379.22	2447.53	1692.13	1667.97	2804.33	2493.42	1803.4	1675.4	1850.77	2156.53	1456.12	1623.16
FBgn0014022	461.04	506.134	393.893	450.112	514.401	496.75	366.809	390.706	545.694	560.958	400.352	444.91	399.942	355.811	356.327	346.394
FBgn0014023	781.016	1643.93	610.107	572.87	1162.96	1078.88	677.942	701.721	1282.77	1136.94	596.295	685.161	659.262	1068.27	592.092	622.91
FBgn0037703	180.058	136.576	200.158	181.214	140.372	139.711	218.339	187.052	152.587	147.752	237.067	170.337	181.448	136.658	198.257	202.645
FBgn0037702	1650.34	1119.72	2051.89	2110.27	1329.09	1418.67	1922.47	1965.71	1496.56	1575.19	2272.69	2361.83	1772.9	1317.42	2062.95	2175.19
FBgn0262180	0	0	0	0	0	0	0	0	1.72415	0.834759	0	0	1.51207	0	0	0
FBgn0000244	1825.81	1373.79	1783.22	1691.72	1664.92	1587.7	1876.62	1804.11	1475.87	1439.12	1721.15	1529.22	1936.2	1756.55	1892.82	1692.04
FBgn0037705	1651.49	865.649	1433.22	1394.76	1170.06	1301.38	1318.77	1319.32	1163.8	1285.53	1463.52	1419.9	1657.98	1304.92	1512.38	1387.57
FBgn0260722	494.3	503.121	444.2	379.965	385.579	505.374	373.36	392.92	730.178	623.565	517.676	448.723	506.543	429.139	294.707	281.507
FBgn0037707	540.174	912.848	420.653	466.48	929.298	764.098	517.463	490.32	864.662	859.801	368.905	481.773	504.275	654.958	412.589	436.236
FBgn0037708	212.17	194.821	192.665	203.427	198.12	188.006	196.505	179.304	179.312	161.108	193.524	205.93	182.96	189.155	198.257	196.656
FBgn0037709	1083.79	1092.61	936.567	999.599	1001.26	915.02	995.625	1017.16	739.661	767.978	799.495	925.412	748.474	833.28	805.085	954.33
FBgn0024833	1122.78	1158.89	1134.58	1239.27	1153.18	1139.25	1244.53	1153.3	1402.6	1277.18	1253.07	1264.81	1103.05	1163.26	1174.81	1274.77
FBgn0027950	354.382	549.316	362.853	308.648	521.509	513.136	391.918	319.87	496.556	515.046	289.076	327.962	319.047	402.474	317.479	331.42
FBgn0037710	682.386	983.145	639.006	668.738	828.906	885.698	688.859	712.79	1015.53	880.67	682.171	807.193	651.702	708.288	644.336	717.744
FBgn0261049	284.423	194.821	321.109	329.692	224.773	221.64	323.142	344.22	210.346	237.906	338.667	319.064	253.272	204.154	305.423	314.45
FBgn0037712	60.7839	66.2794	66.3625	52.6105	58.6364	60.3689	37.1176	59.7681	57.7591	52.5898	54.4286	40.6774	71.8233	78.3283	53.583	57.8987
FBgn0037713	169.736	173.732	113.458	169.523	146.591	145.748	152.837	156.061	106.035	131.057	111.276	110.592	105.089	129.992	120.562	116.796
FBgn0037714	1091.82	1083.57	725.706	716.672	1006.59	888.285	765.278	630.885	674.143	812.22	604.762	757.617	853.563	1434.08	593.432	982.281
FBgn0037715	3041.49	3761.86	2207.09	2406.05	3124.61	3012.41	1891.91	1963.49	3331.92	3479.27	2240.04	2171.16	2941.73	4001.41	2566.63	2504.62
FBgn0027338	7560.15	6530.53	7673.43	7466.01	7334.88	7880.73	7828.54	7612.68	7781.1	7738.21	7453.08	7812.61	7105.21	6562.91	6868	6655.35
FBgn0037716	477.097	400.689	567.292	516.752	480.641	487.263	671.392	612.069	598.281	563.462	590.247	644.483	462.693	404.141	555.924	634.889
FBgn0037717	481.684	386.63	565.151	552.995	489.525	542.458	592.79	541.233	662.074	520.889	709.99	613.975	464.205	416.64	582.715	520.09
FBgn0053654	0	1.00423	0	0	0	0	0	0	0	0	0	0	0.756034	0	0	0
FBgn0037718	1770.76	1876.91	1511.35	1643.79	2001.63	1767.08	1598.24	1696.75	1871.57	1866.52	1527.63	1730.06	1767.61	1973.21	1544.53	1742.95
FBgn0037719	587.196	702.964	575.855	570.532	649.443	619.213	589.515	514.67	885.352	787.177	712.409	599.992	680.431	737.453	616.205	614.924
FBgn0037720	1303.99	762.213	1482.45	1289.54	1024.36	986.601	1291.47	1232.99	1019.84	1093.53	1374.02	1444.05	1385.05	1139.93	1450.76	1302.72
FBgn0037721	315.388	466.969	286.857	277.082	308.285	291.496	255.457	218.043	305.175	338.912	222.552	264.403	319.047	455.804	263.896	226.603
FBgn0037722	271.807	248.046	280.435	295.788	229.215	279.422	310.041	335.365	310.347	266.288	322.943	357.199	250.247	209.987	266.576	299.476
FBgn0005585	14130.5	20106.8	11110.4	11631.6	15967.8	16002.9	10648.4	12405.2	16555.3	17540.8	9768.11	11814.3	12844.3	15370.7	10018.7	11476.9
FBgn0037723	1130.81	1725.27	1410.74	1418.14	1347.75	1337.6	1373.35	1468.75	1431.05	1269.67	1312.33	1460.57	1100.03	1211.59	1189.54	1475.42
FBgn0266413	1.14687	0	1.07036	0	1.77686	0	1.09169	0	0.862076	0.834759	2.41905	0	0	0.83328	0	0
FBgn0003334	785.604	578.439	1047.88	1068.58	748.947	750.299	1145.19	1034.87	781.903	713.719	1255.49	1222.87	860.367	557.464	1000.66	1236.84
FBgn0012344	133.037	119.504	116.67	99.3754	127.934	138.849	89.5189	87.4385	93.1042	122.71	113.695	73.7279	135.33	135.825	100.468	90.841
FBgn0037724	113.54	111.47	80.2772	80.6694	160.806	85.3789	51.3096	199.227	292.244	424.057	65.3143	99.1513	996.453	349.978	45.5456	81.8567
FBgn0037726	157.121	60.254	165.906	168.354	99.5042	123.325	141.92	152.741	92.2421	140.239	180.219	132.202	177.668	122.492	186.201	132.768
FBgn0263389	0	0	0	0	0	0	0	1.10682	0	0	1.20952	0	0.756034	0	0	0
FBgn0037727	198.408	109.461	225.847	171.861	167.025	229.402	256.548	243.5	123.277	128.553	175.381	184.32	243.443	159.157	155.391	200.649
FBgn0037728	8390.48	12508.7	6172.78	6445.37	10216.1	10273.1	6415.89	6478.19	12044.9	11608.2	6175.83	6564.32	7071.95	8700.28	5556.56	5635.14
FBgn0028997	100.924	158.669	130.584	135.618	171.467	137.124	225.981	133.925	210.346	141.909	130.629	147.456	98.2845	137.491	120.562	151.734
FBgn0037730	65.3714	80.3387	88.8401	91.1915	62.1901	74.1675	67.6851	77.4771	85.3455	81.8063	73.7809	94.0666	79.3836	92.4941	109.845	69.8777
FBgn0069242	683.533	1131.77	761.028	735.378	845.786	776.172	740.169	789.16	894.835	1000.04	741.438	805.922	737.134	799.116	870.724	754.679
FBgn0037731	1.14687	0	0	0	0	0	0	0	0	0	0	1.27117	0	0	0	0
FBgn0260463	4.58747	4.01693	3.21109	8.18385	0	0.862413	0	0	8.62076	3.33903	4.83809	2.54234	6.04827	8.3328	0	3.99301
FBgn0053105	0	0	0	0	0	0	0	0	0	0	0	0	0	0	0	0
FBgn0052939	0	0	0	0	0	0	0	0	0	0	0	0	0	0	0	0
FBgn0051352	779.869	673.841	626.162	549.487	853.782	778.759	651.742	557.835	756.04	752.952	568.476	580.925	816.517	873.278	648.354	562.016
FBgn0037734	1720.3	1231.19	1910.6	1909.18	1157.62	1145.28	1389.73	1420.05	1537.08	1633.62	2027.16	2013.53	1778.95	1526.57	1766.9	1987.52
FBgn0016792	722.526	547.307	1057.52	1111.84	708.967	728.739	1241.26	1213.07	838.8	559.288	1115.18	1219.05	765.107	469.97	945.74	1165.96
FBgn0263477	0	0	0	0	1.77686	0.862413	0	0	0.862076	1.66952	0	2.54234	0	0	0	0
FBgn0002431	3372.93	1626.86	4595.07	4685.84	2400.54	2616.56	4701.93	4941.93	2332.78	2510.95	4695.37	5116.46	3530.68	2215.69	4269.23	4557.02
FBgn0262477	333.738	302.274	246.183	220.964	302.066	314.781	213.972	174.877	261.209	325.556	274.562	224.997	337.191	399.141	225.049	220.614
FBgn0003886	141.065	111.47	135.936	112.236	90.6199	98.3151	84.0605	83.0112	85.3455	71.7892	68.9428	63.5585	117.941	84.1613	95.1099	84.8515
FBgn0037736	221.345	125.529	184.102	122.758	157.252	148.335	124.453	123.963	115.518	135.231	153.609	141.1	223.03	176.655	155.391	131.769
FBgn0037737	454.159	600.532	297.561	294.619	549.05	564.881	384.276	306.588	700.868	488.334	361.648	307.623	379.529	483.303	250.501	320.439
FBgn0085438	19.4967	18.0762	21.4073	16.3677	18.657	15.5234	9.82525	15.4954	9.48283	15.8604	18.1429	21.6099	29.4853	19.9987	28.1311	23.9581
FBgn0051415	2.29373	1.00423	0	0	0	6.8993	1.09169	0	0.862076	0	1.20952	2.54234	0.756034	0	0	0
FBgn0037739	309.654	475.003	362.853	351.906	449.546	443.28	432.311	399.561	483.625	439.083	370.114	382.622	322.827	368.31	346.95	401.298
FBgn0005777	1813.2	2002.44	1836.74	1966.46	2005.19	1951.64	1948.67	2002.23	2353.47	2016.78	1929.19	2202.94	1639.84	1756.55	1661.07	2093.34
FBgn0037741	340.619	284.198	399.245	398.671	286.075	351.865	432.311	417.27	356.899	346.425	497.114	463.977	375.749	240.818	368.383	378.338
FBgn0037742	12.6155	31.1312	17.1258	7.01473	43.5331	51.7448	41.4844	29.884	17.2415	20.0342	7.25714	12.7117	19.6569	8.3328	13.3958	29.9476
FBgn0037743	502.328	401.693	559.8	554.164	449.546	427.757	546.939	561.156	435.348	431.57	535.819	528.807	468.741	434.139	569.32	504.118
FBgn0037744	1165.22	988.166	1142.08	1260.31	1004.81	952.966	1112.44	1221.93	848.283	940.773	1081.31	1192.36	1085.67	989.104	1130.6	1260.79
FBgn0266720	828.038	774.264	759.957	820.724	814.691	798.595	910.473	791.374	844.834	749.613	772.886	784.312	883.048	803.282	751.502	763.663
FBgn0037746	213.317	229.969	312.546	270.067	286.075	250.962	361.351	327.618	350.865	249.593	320.524	341.945	198.837	188.321	336.233	366.359
FBgn0024330	399.11	387.634	448.482	427.899	426.447	437.243	436.678	390.706	487.935	458.282	408.819	475.418	379.529	374.976	380.439	388.32
FBgn0037747	1172.1	1485.26	1014.7	961.018	1290.89	1291.03	974.883	961.823	1337.94	1385.7	1069.22	1005.5	1208.14	1505.74	1101.13	997.255
FBgn0037749	848.681	1295.46	735.339	782.143	1011.92	996.95	747.811	707.256	987.939	1070.16	731.762	728.38	801.396	1139.93	794.368	804.592
FBgn0037750	235.108	212.898	264.38	285.266	216.777	236.301	251.09	262.315	385.348	317.208	291.495	305.081	381.797	323.313	318.819	234.589
FBgn0037751	32.1123	22.0931	39.6034	23.3824	34.6488	28.4596	25.109	19.9227	32.7589	27.547	20.5619	12.7117	30.9974	26.665	34.829	28.9493
FBgn0261599	22375.4	42762.3	17863.3	17992.8	31900.9	30338	18564.3	17980.2	36834.8	33743.4	18266.2	19422.2	21383.7	29004.8	19335.4	16946.3
FBgn0086663	10.3218	12.0508	10.7036	7.01473	10.6612	12.0738	3.27508	8.85453	0.862076	9.18234	9.67619	13.9829	6.04827	7.49952	6.69788	2.99476
FBgn0051514	0	1.00423	0	3.50737	0	0.862413	3.27508	2.21363	0	1.66952	1.20952	1.27117	0.756034	0.83328	4.01873	6.98777
FBgn0037753	49.3153	61.2583	51.3774	68.9782	75.5166	63.8186	61.1349	70.8362	63.7936	74.2935	60.4762	53.3891	52.9224	74.9952	75.0162	75.8672
FBgn0002868	6198.81	4846.43	5268.32	5486.69	4905.02	3391.87	4264.16	5023.84	5067.28	2749.69	3173.79	3041.91	5085.09	3210.63	5504.32	4025.95
FBgn0037754	510.356	314.325	326.461	323.847	365.145	354.452	279.474	258.995	275.864	333.903	306.009	245.336	443.792	384.142	332.215	259.546
FBgn0037755	830.331	820.459	807.053	797.341	812.914	781.346	840.605	786.946	906.042	772.152	921.657	847.87	768.887	754.952	786.331	890.441
FBgn0037756	2996.76	4744	2504.65	2616.49	3860.23	3964.51	2578.58	2618.73	4845.73	4382.48	2616.2	2755.9	2559.18	2981.48	2131.26	2332.92
FBgn0037757	1026.45	647.731	1122.81	1118.85	836.901	948.654	1157.2	1211.96	953.456	907.383	1101.88	1273.71	958.652	737.453	1075.68	1131.02
FBgn0037758	1062	744.137	1357.22	1307.08	908.864	947.792	1344.97	1519.66	942.249	966.65	1476.83	1585.15	1137.08	819.948	1273.94	1491.39
FBgn0037759	19.4967	15.0635	17.1258	29.228	25.7645	16.3858	39.301	27.6704	32.7589	15.8604	20.5619	10.1694	17.3888	19.9987	25.4519	28.9493
FBgn0037760	1426.7	798.366	1883.84	1908.01	1021.69	1029.72	1987.98	1869.41	1242.25	1180.35	2071.91	2014.8	1388.84	880.777	1578.02	1862.74
FBgn0264827	405.991	286.207	253.676	263.052	328.719	314.781	213.972	229.111	64.6557	230.393	200.781	226.268	249.491	333.312	198.257	276.516
FBgn0037761	76.8401	31.1312	372.486	78.3312	66.6323	53.4696	217.247	151.634	22.414	20.869	31.4476	54.6603	54.4345	41.664	49.5643	51.9091
FBgn0037762	3477.3	4464.82	2216.72	2016.74	3354.71	3331.5	2084.04	1753.2	3458.65	3521.85	2340.43	1802.52	2770.11	4283.06	2458.12	2002.5
FBgn0037763	3823.65	4425.66	3368.43	3364.73	3542.17	3282.34	2700.85	2411.75	3422.44	3627.03	2937.93	2866.49	3663.74	4358.89	3517.73	3094.58
FBgn0037764	373.879	449.897	279.365	259.545	367.81	298.395	187.771	187.052	421.555	338.077	306.009	231.353	316.778	434.139	241.124	197.654
FBgn0037765	923.228	768.239	883.049	751.745	720.517	745.987	561.131	504.708	882.766	692.85	701.524	594.908	826.346	891.61	629.6	640.878
FBgn0262104	1.14687	3.0127	2.14073	1.16912	8.8843	6.8993	4.36678	4.42726	7.75868	7.51283	2.41905	1.27117	4.53621	8.3328	4.01873	4.99126
FBgn0267440	0	0	0	2.33824	0	0	0	0	0	0	0	0	0	0	0	0
FBgn0085331	0	0	0	0	0	0	0	0	0	0	0	0	0	0	0	0
FBgn0262105	0	0	0	0	0	0	0	0	0	0	0	0	0	0	0	0
FBgn0037766	108.952	40.1693	65.2921	50.2722	55.0827	74.1675	55.6764	48.6999	58.6212	60.1026	70.1524	47.0333	74.0914	57.4963	60.2809	58.8969
FBgn0267336	2777.71	1533.46	2282.01	2242.38	1717.34	1850.74	2167.01	2027.69	1580.18	1902.41	2346.48	2159.72	2601.51	1984.87	2160.74	2278.01
FBgn0266389	0	0	0	0	0	0	0	0	0	0	0	0	0	0	0	0
FBgn0037770	1052.82	1003.23	1545.6	1491.8	1080.33	1156.5	1635.36	1563.93	1468.12	1069.33	1701.8	1708.45	1139.34	844.946	1347.61	1561.27
FBgn0045473	0	0	0	1.16912	0	0	0	1.10682	0	0	0	0	0	0	0	0
FBgn0037772	3.4406	2.00847	5.35181	1.16912	0.88843	2.58724	2.18339	0	1.72415	0.834759	1.20952	2.54234	3.02414	2.49984	1.33958	0.998253
FBgn0037773	100.924	87.3683	168.047	153.155	101.281	100.04	173.579	140.566	163.794	125.214	201.99	153.812	105.845	88.3277	159.409	109.808
FBgn0053208	4853.54	2208.31	5001.8	4945.39	4706.02	5372.83	6922.43	7307.2	3375.03	3770.6	4863.49	5241.03	5302.83	4949.68	5572.63	5196.9
FBgn0051407	0	0	0	0	0	0	0	0	0	0	0	0	0	0	0	0
FBgn0027524	438.103	686.896	435.638	477.002	518.843	473.465	516.371	520.204	526.728	532.576	478.971	516.095	405.234	505.801	463.493	504.118
FBgn0037777	322.27	607.561	190.525	251.361	422.893	422.582	211.789	221.363	472.418	428.231	256.419	237.709	285.781	476.636	258.538	248.565
FBgn0037778	186.939	164.694	204.439	258.376	171.467	173.345	221.614	213.616	191.381	183.647	223.762	214.828	209.422	169.989	202.276	241.577
FBgn0037779	816.569	1075.53	707.51	734.209	881.323	895.185	691.043	754.849	1033.63	899.87	690.638	723.296	768.131	880.777	616.205	750.686
FBgn0037780	778.722	740.12	731.058	714.334	804.03	765.823	718.335	701.721	788.799	803.038	774.095	783.041	785.52	729.953	775.614	732.718
FBgn0037781	136.477	211.893	158.414	140.295	176.798	169.033	161.571	138.352	231.036	180.308	142.724	158.896	151.963	227.485	139.316	151.734
FBgn0265081	63.0777	43.182	40.6738	57.287	64.8554	46.5703	33.8425	37.6317	77.5868	81.8063	50.8	45.7621	79.3836	84.1613	65.6392	63.8882
FBgn0051410	446.131	819.455	301.842	430.237	748.947	738.226	377.726	535.699	653.453	757.126	278.19	538.976	740.158	1293.25	238.444	535.064
FBgn0037782	444.984	622.625	398.175	444.266	463.761	421.72	439.953	446.047	408.624	469.969	388.257	361.012	452.109	612.461	558.603	396.306
FBgn0037783	2.29373	1.00423	2.14073	0	0.88843	0	2.18339	2.21363	1.72415	0.834759	1.20952	5.08468	7.56034	0.83328	0	0
FBgn0266732	0	1.00423	0	1.16912	0	0	0	0	0	0	0	0	0	0	0	0
FBgn0053629	0	0	0	0	0	0	0	0	0	0	0	0	0	0	0	0
FBgn0053630	0	0	0	0	0	0	0	0	0	0	0	0	0	0	0	0
FBgn0053631	0	0	0	0	0	0	0	0	0	0	0	0	0	0	0	0
FBgn0053783	0	0	0	0	0	0	0	0	0	0	0	0	0	0	0	0
FBgn0053784	6.8812	5.02117	4.28145	1.16912	6.21901	6.8993	1.09169	3.32045	4.31038	5.84331	1.20952	2.54234	6.04827	7.49952	0	3.99301
FBgn0041105	10.3218	4.01693	8.5629	5.84561	4.44215	14.661	6.55017	0	9.48283	4.17379	3.62857	2.54234	9.82845	8.3328	12.0562	2.99476
FBgn0037786	41.2872	38.1609	38.5331	35.0737	45.31	55.1944	29.4758	38.7386	48.2762	48.416	36.2857	36.8639	37.0457	95.8272	46.8851	55.9022
FBgn0266414	11.4687	1.00423	7.49254	3.50737	12.438	11.2114	6.55017	2.21363	11.207	2.50428	1.20952	5.08468	12.0965	5.83296	5.3583	9.98253
FBgn0262378	0	0	0	2.33824	0	0	0	0	0	0	0	0	0	0	0	0
FBgn0263413	1169.8	676.853	677.54	676.922	732.955	733.051	645.191	587.719	537.935	560.123	494.695	489.4	547.369	590.796	364.365	399.301
FBgn0262419	0	0	0	0	0	0	0	0	0	0	0	0	0	0	0	0
FBgn0262459	0	0	0	0	0	0	0	0	0	0	0	0	0	0	0	0
FBgn0028734	3637.86	3076.97	3876.85	3758.73	3456.88	3948.13	3878.79	3913.7	3999.17	4209.69	3673.32	4132.57	3240.36	2857.32	3267.22	3530.82
FBgn0037788	1883.16	1859.84	1917.02	1934.9	1337.98	1365.2	1346.06	1365.81	1377.6	1352.31	1453.85	1552.1	1395.64	1794.89	1359.67	1950.59
FBgn0266721	53.9027	38.1609	32.1109	17.5368	35.5372	33.6341	25.109	28.7772	31.8968	25.0428	45.9619	26.6946	38.5578	53.3299	17.4145	22.9598
FBgn0051477	5.73433	4.01693	1.07036	0	3.55372	5.17448	4.36678	1.10682	1.72415	0.834759	0	0	2.2681	4.99968	2.67915	5.98952
FBgn0001321	154.827	156.66	161.625	201.089	151.922	124.187	152.837	160.488	105.173	141.909	140.305	170.337	192.789	172.489	151.372	184.677
FBgn0267705	0	1.00423	1.07036	0	0	0	0	0	0	0.834759	0	0	0	0	0	0
FBgn0004889	3028.87	2562.8	3631.74	3604.4	3037.54	3202.14	3970.49	3735.5	3656.06	2952.54	3982.96	3852.92	3113.35	2502.34	3125.23	3772.4
FBgn0037792	376.172	313.321	416.371	363.597	391.798	367.388	378.818	479.251	425.003	442.422	445.105	418.215	340.972	245.818	353.648	474.17
FBgn0261817	9.17493	14.0593	6.42218	16.3677	3.55372	12.9362	4.36678	6.6409	12.9311	11.6866	18.1429	19.0676	13.6086	18.3322	9.37703	10.9808
FBgn0086359	1353.3	933.937	1370.06	1660.15	1089.22	1037.48	1515.27	1536.26	1103.46	998.371	1429.66	1644.89	1511.31	1111.6	1595.43	1618.17
FBgn0085332	0	0	1.07036	0	0	0	0	0	0	0	0	0	0	0	0	0
FBgn0037794	276.395	363.533	221.565	252.53	345.599	300.12	274.015	271.17	406.9	370.633	298.752	296.183	238.907	342.478	283.99	227.602
FBgn0040238	1251.23	1045.41	1237.34	1275.51	1083	1103.89	1066.59	1278.37	1132.77	1192.87	1390.95	1349.98	1196.8	1029.1	1184.18	1165.96
FBgn0037796	1337.25	1232.19	1055.38	1018.31	1117.65	1073.7	984.708	1018.27	1000.87	1043.45	918.028	964.818	1351.03	1367.41	996.644	1023.21
FBgn0004575	939.284	521.197	700.017	666.4	773.823	726.152	774.011	672.944	573.28	654.451	820.057	643.212	904.973	711.621	711.315	659.845
FBgn0025879	1128.52	1312.53	951.552	918.93	1312.21	1310.01	1009.82	1002.78	1205.18	1181.18	978.505	849.142	1314.74	1378.25	952.438	953.331
FBgn0037797	0	0	0	0	0	0.862413	1.09169	1.10682	0	0	0	1.27117	1.51207	0	0	1.99651
FBgn0037798	36.6997	18.0762	14.9851	9.35298	20.4339	21.5603	19.6505	21.0295	19.8277	27.547	16.9333	19.0676	23.4371	29.9981	18.7541	8.98428
FBgn0083943	3.4406	1.00423	0	0	0	0	1.09169	1.10682	0.862076	2.50428	0	0	0	0.83328	0	0
FBgn0261928	1130.81	376.588	954.763	939.974	654.773	799.457	897.373	820.151	633.626	613.548	938.59	830.074	1083.4	797.449	929.665	771.649
FBgn0037801	387.641	265.118	554.448	494.539	314.504	337.204	453.053	464.863	281.037	282.148	452.362	523.722	483.862	470.803	363.025	547.043
FBgn0037802	111.246	147.622	95.2623	119.25	148.368	114.701	116.811	100.72	172.415	143.578	122.162	111.863	93.7483	109.16	84.3933	109.808
FBgn0040078	1317.75	1582.67	1431.07	1501.15	1416.16	1530.78	1391.91	1483.13	1791.39	1569.35	1471.99	1591.5	1134.05	1119.93	1255.18	1314.7
FBgn0262617	2064.36	902.806	1995.16	2121.96	1528.99	1657.56	2136.45	2180.43	1320.7	1490.88	2071.91	2233.45	2243.15	1768.22	2468.84	2310.96
FBgn0011970	0	0	0	0	0	0	0	0	0	0	0	0	0	0	0	0
FBgn0037807	1485.19	1732.3	1948.06	1943.08	1353.97	1553.21	1796.93	1959.06	2024.15	1835.63	2136.02	2310.99	1724.51	1492.4	1702.6	1969.55
FBgn0266717	3964.72	1656.99	5495.24	5282.09	2715.93	2756.27	5285.98	5825.17	2743.99	2875.74	5550.5	6043.14	4436.41	2739.83	5231.04	5553.28
FBgn0037809	125.008	225.953	154.132	106.39	196.343	156.959	146.287	138.352	216.381	186.986	129.419	147.456	147.427	170.822	137.976	143.748
FBgn0037810	2448.56	1489.28	3287.08	3735.34	1961.65	2119.81	3684.47	3487.58	2970.71	2313.95	4025.29	4417.32	2453.33	1567.4	2707.28	3668.58
FBgn0037811	102.071	73.3091	109.177	139.126	110.165	113.839	201.963	182.625	43.1038	35.0599	33.8667	71.1855	64.2629	33.3312	77.6954	131.769
FBgn0037812	1.14687	4.01693	1.07036	2.33824	0	0	3.27508	3.32045	0	3.33903	1.20952	2.54234	0	0	0	0.998253
FBgn0051406	0	0	1.07036	0	0	0	0	0	0.862076	0	0	0	0	0	0	0
FBgn0015396	641.098	469.981	939.778	833.584	621.013	597.652	1236.89	929.726	725.006	536.75	963.99	976.259	633.557	401.641	864.026	1024.21
FBgn0020379	387.641	244.029	488.085	517.921	319.835	344.103	534.93	472.61	290.52	318.878	505.581	540.247	363.653	251.651	466.172	430.247
FBgn0266243	12.6155	12.0508	12.8444	8.18385	8.8843	7.76172	4.36678	4.42726	15.5174	13.3561	9.67619	8.89819	10.5845	6.66624	9.37703	8.98428
FBgn0259938	1323.48	832.51	1376.49	1420.48	1012.81	1014.2	1315.49	1322.65	1117.25	1120.25	1410.3	1438.96	1283.75	922.441	1407.89	1344.65
FBgn0045443	1.14687	0	3.21109	2.33824	1.77686	0	1.09169	0	1.72415	2.50428	1.20952	0	0	0	2.67915	0
FBgn0037814	488.565	378.596	542.674	556.502	474.422	463.978	661.567	591.04	456.038	417.379	508	511.01	402.21	361.644	459.474	509.109
FBgn0262223	0	1.00423	0	0	0	0	0	2.21363	0.862076	0	0	0	0	0	1.33958	0.998253
FBgn0262420	0	0	0	0	1.77686	0.862413	0	1.10682	0.862076	0	0	0	0.756034	0	0	0
FBgn0024957	3194.02	2074.75	4552.25	4622.71	3081.97	2911.51	4753.24	5458.82	2118.12	2474.22	4848.98	5089.76	3747.66	3251.46	5348.92	6814.07
FBgn0037815	258.045	274.156	229.058	285.266	241.653	263.898	254.365	246.82	239.657	248.758	286.657	274.573	197.325	167.489	204.955	191.665
FBgn0037816	206.436	214.906	220.495	230.317	200.785	188.006	211.789	200.334	182.76	203.681	177.8	217.37	209.422	176.655	230.407	193.661
FBgn0037817	241.989	274.156	229.058	230.317	181.24	213.016	203.055	169.343	196.553	232.063	258.838	226.268	257.808	291.648	249.161	246.568
FBgn0266244	0	0	0	0	0	0	0	0	0	0	0	0	0	0	0	0
FBgn0266260	0	0	0	0	0	0	0	0	0	0	0	0	0.756034	0	0	0
FBgn0267136	0	0	0	0	0	0	0	0	0	0	0	0	0	0	0	0
FBgn0001235	1292.52	741.124	914.09	931.79	900.868	1008.16	1004.36	842.287	698.281	810.551	926.495	761.431	1116.66	923.274	902.874	877.464
FBgn0263547	0	0	0	0	0	0	0	0	0	0	0	0	0	0	0	0
FBgn0264788	10.3218	9.0381	8.5629	8.18385	7.10744	13.7986	4.36678	7.74771	11.207	6.67807	2.41905	12.7117	8.31638	8.3328	8.03745	3.99301
FBgn0037818	453.012	484.041	315.757	376.457	432.666	404.472	311.133	322.084	360.348	360.616	307.219	303.81	390.114	518.3	349.629	388.32
FBgn0037819	2338.46	2666.24	1707.23	1868.26	3851.35	3233.19	2674.65	2835.66	1356.05	1712.92	1133.32	1295.32	2401.17	3697.26	1722.69	2341.9
FBgn0265161	11.4687	19.0804	12.8444	24.5516	13.3265	7.76172	10.9169	5.53408	12.0691	10.8519	9.67619	7.62702	6.80431	11.6659	6.69788	14.9738
FBgn0262717	668.623	434.833	580.137	581.054	543.719	463.116	427.944	561.156	312.934	340.582	372.533	456.35	598.023	564.131	472.87	601.946
FBgn0020385	3996.83	4813.29	5083.15	4441.49	3933.08	5359.9	5285.98	6064.25	3291.41	3015.15	3320.14	4784.68	4268.57	5163.84	3584.7	5764.91
FBgn0037822	1353.3	1876.91	1274.8	1297.73	1492.56	1521.3	1320.95	1371.35	1895.7	1693.73	1334.1	1333.46	1238.38	1272.42	1221.69	1281.76
FBgn0051391	5.73433	2.00847	4.28145	8.18385	2.66529	5.17448	6.55017	7.74771	3.4483	11.6866	8.46666	3.81351	6.04827	2.49984	2.67915	0
FBgn0051467	50.4621	51.2159	34.2516	35.0737	45.31	41.3958	36.0259	34.3113	47.4142	52.5898	41.1238	50.8468	39.3138	44.9971	46.8851	33.9406
FBgn0037824	0	0	0	0	0	0	0	0	0	0	0	0	0	0	0	0
FBgn0051278	136.477	197.834	117.74	123.927	143.037	146.61	127.728	137.245	164.656	158.604	134.257	134.744	117.941	139.991	129.939	135.762
FBgn0051373	950.752	1603.76	738.55	812.54	1218.04	1078.88	683.401	761.49	1011.21	1099.38	598.714	700.415	863.391	1592.4	720.692	714.749
FBgn0037826	1.14687	0	0	0	0.88843	0	0	0	0	0	0	2.54234	0	0	0	0
FBgn0037827	0	0	0	0	0	0	0	0	0	0	0	0	0	0	0	0
FBgn0037828	0	0	0	0	0	0	0	0	0	0	0	0	0	0	0	0
FBgn0004841	17.203	19.0804	8.5629	8.18385	13.3265	18.9731	15.2837	16.6022	16.3794	16.6952	10.8857	15.254	19.6569	10.8326	18.7541	8.98428
FBgn0037829	2.29373	3.0127	1.07036	4.67649	4.44215	1.72483	0	2.21363	2.58623	5.00855	2.41905	2.54234	6.04827	2.49984	5.3583	0.998253
FBgn0051272	497.74	327.38	413.16	487.524	513.513	401.022	331.875	425.017	316.382	300.513	290.286	378.809	502.763	638.293	328.196	389.319
FBgn0266371	2.29373	0	0	0	0.88843	0	0	0	0	1.66952	0	0	0.756034	0	0	0
FBgn0051390	315.388	570.405	245.113	249.023	519.732	562.293	293.666	324.297	440.521	406.527	226.181	237.709	336.435	414.974	265.236	269.528
FBgn0266372	10.3218	4.01693	0	4.67649	7.99587	5.17448	5.45847	8.85453	6.03453	4.17379	1.20952	6.35585	4.53621	2.49984	4.01873	3.99301
FBgn0037831	561.965	290.224	500.93	536.627	495.744	556.256	544.756	599.894	386.21	436.579	592.667	540.247	542.077	374.976	569.32	557.025
FBgn0010421	362.41	370.562	361.783	361.259	533.947	601.102	441.045	541.233	461.211	388.998	351.971	420.757	402.966	399.974	399.193	557.025
FBgn0266446	5392.57	5530.31	4291.08	4556.07	4995.64	5135.67	3900.62	4055.37	4824.18	5432.61	4159.55	4182.15	5845.66	6060.45	5001.97	4269.53
FBgn0266451	1.14687	9.0381	1.07036	0	4.44215	4.31207	0	1.10682	5.17245	0.834759	3.62857	1.27117	3.78017	4.99968	0	0
FBgn0266448	786.751	730.078	515.915	536.627	784.484	752.024	551.306	431.658	687.074	676.154	471.714	399.147	716.721	765.784	475.549	448.216
FBgn0037832	8.02807	10.0423	7.49254	5.84561	33.7604	19.8355	31.6591	27.6704	12.0691	4.17379	6.04762	8.89819	18.1448	34.9978	16.0749	12.9773
FBgn0261356	8.02807	6.0254	8.5629	2.33824	9.77273	11.2114	6.55017	8.85453	13.7932	5.84331	3.62857	7.62702	12.8526	4.1664	5.3583	11.979
FBgn0261380	809.688	861.632	726.776	904.9	899.98	889.148	801.304	845.608	863.8	791.351	784.981	811.006	668.334	789.116	744.804	802.595
FBgn0260944	902.584	1299.48	828.461	834.753	1080.33	1059.91	742.352	761.49	1184.49	1237.11	797.076	791.939	784.764	921.608	751.502	723.733
FBgn0037834	1573.5	1780.51	1919.16	1937.24	1788.41	1782.61	2063.3	2178.21	1982.77	1747.15	1828.8	2102.52	1620.94	1230.75	1776.28	1865.73
FBgn0017577	1043.65	1321.57	1527.41	1414.64	1310.43	1235.84	1903.92	1639.19	1692.25	1166.99	1717.52	1557.18	997.209	962.439	1405.21	1667.08
FBgn0037835	902.584	1577.65	793.139	719.01	991.488	894.322	637.55	517.99	1206.91	796.36	526.143	383.893	629.777	929.107	588.074	467.182
FBgn0037836	111.246	45.1905	97.403	65.4708	79.0703	70.7179	69.8684	61.9817	70.6902	61.7721	84.6666	77.5414	83.1638	72.4954	84.3933	46.9179
FBgn0037837	4.58747	8.03387	4.28145	0	3.55372	3.44965	0	3.32045	2.58623	5.00855	4.83809	2.54234	6.04827	8.3328	6.69788	2.99476
FBgn0037838	216.758	186.787	177.68	176.537	207.893	212.154	241.264	200.334	158.622	173.63	169.333	169.066	186.74	195.821	159.409	214.624
FBgn0261053	518.384	314.325	540.533	561.179	390.021	441.555	520.738	539.019	304.313	353.103	458.409	564.4	473.278	340.812	479.568	461.193
FBgn0259740	306.213	405.71	192.665	197.582	400.682	297.533	193.23	210.295	289.657	388.163	198.362	141.1	307.706	424.973	233.086	182.68
FBgn0037841	30.9654	43.182	19.2665	16.3677	31.9835	22.4227	29.4758	19.9227	34.483	18.3647	10.8857	25.4234	24.1931	24.1651	16.0749	20.9633
FBgn0037842	486.271	550.32	508.422	562.348	385.579	449.317	520.738	495.854	492.245	470.804	541.867	518.637	458.157	462.471	570.659	588.969
FBgn0037843	1391.15	1559.57	1438.57	1281.36	1680.91	1714.48	1454.14	1449.93	1866.39	1678.7	1265.16	1469.47	1160.51	1279.92	1231.07	1305.71
FBgn0037844	247.723	422.782	203.369	270.067	634.339	546.77	575.323	427.231	274.14	136.9	102.81	191.947	102.065	166.656	143.335	240.579
FBgn0037845	279.835	274.156	235.48	234.994	259.422	241.476	232.531	240.179	214.657	217.872	208.038	197.031	283.513	318.313	279.971	244.572
FBgn0037846	485.125	619.612	568.363	540.134	581.922	594.203	542.572	584.399	428.452	365.624	356.809	415.673	458.157	531.633	490.285	515.098
FBgn0267376	2212.31	2332.83	1679.4	1719.78	2919.38	2918.41	2161.56	2075.28	1907.77	1995.91	1375.23	1475.83	2092.7	2509.01	1813.79	1823.81
FBgn0037848	466.775	529.231	454.904	426.73	513.513	507.961	463.97	508.029	600.005	532.576	515.257	527.536	489.91	483.303	455.456	489.144
FBgn0011768	2810.97	3996.85	2989.52	3335.51	3971.28	3605.75	3447.57	4064.23	3115.54	2902.46	2318.66	2874.12	2580.35	3258.13	2872.05	3464.94
FBgn0037849	75.6932	46.1947	27.8294	32.7354	51.529	49.1575	44.7595	30.9909	53.4487	55.0941	25.4	22.8811	58.2146	62.496	37.5081	28.9493
FBgn0022359	567.699	904.814	609.036	619.635	697.418	646.81	621.174	696.187	548.28	683.667	508	629.229	622.216	834.113	585.394	637.884
FBgn0266705	5.73433	14.0593	6.42218	9.35298	23.9876	24.1476	30.5674	35.4181	1.72415	2.50428	8.46666	8.89819	15.1207	40.8307	12.0562	13.9755
FBgn0037850	22.9373	34.1439	16.0554	22.2133	155.475	150.06	152.837	160.488	3.4483	11.6866	7.25714	15.254	58.2146	110.826	46.8851	54.9039
FBgn0037852	407.138	347.465	394.964	328.523	376.695	388.948	412.661	389.599	416.383	399.849	428.171	402.961	396.918	397.475	492.964	395.308
FBgn0037853	121.568	150.635	112.388	108.728	126.157	125.912	118.995	98.5066	132.76	131.892	148.771	116.948	167.084	215.82	151.372	138.757
FBgn0037856	306.213	266.122	287.928	333.2	288.74	282.009	329.692	306.588	289.657	272.131	349.552	287.284	309.218	234.152	282.65	298.478
FBgn0042094	578.021	841.548	509.493	552.995	720.517	602.827	477.07	443.833	733.627	772.152	528.562	532.62	538.296	725.787	526.453	478.163
FBgn0037855	630.777	594.506	727.847	721.348	644.112	701.142	795.845	728.285	798.282	683.667	798.286	744.906	632.801	571.63	696.579	671.824
FBgn0267137	6.8812	6.0254	2.14073	4.67649	19.5455	7.76172	9.82525	5.53408	9.48283	5.00855	0	0	5.29224	11.6659	6.69788	3.99301
FBgn0267138	0	0	0	0	0	0	0	0	1.72415	0	0	0	0	0	0	0
FBgn0037857	0	0	0	0	0.88843	0	0	0	0	0	0	0	0	0	0	0
FBgn0267121	0	0	0	0	0	0	0	0	0	0	0	0	0	0	0	0
FBgn0083950	188.086	104.44	162.695	125.096	175.021	143.161	160.479	151.634	112.07	117.701	171.752	137.286	161.791	169.989	144.674	117.794
FBgn0267671	0	0	0	0	0	0	0	0	0	0	0	0	0	0	0	0
FBgn0266245	0	0	0	0	0	0	0	0	0	0	0	0	0	0	0	0
FBgn0263403	0	0	0	0	0	0	0	0	0	0	0	0	0	0	0	0
FBgn0267139	0	0	0	0	0	0	0	0	0	0	0	0	0	0	0	0
FBgn0037860	0	0	0	0	0	0	0	0	0	0	0	0	0	0	0	0
FBgn0040256	745.463	1317.55	568.363	542.473	796.922	845.165	659.383	521.31	973.284	527.567	268.514	385.165	437.744	1140.76	235.765	320.439
FBgn0037862	1.14687	0	0	0	0.88843	0	1.09169	0	0	0	0	0	0	0	2.67915	0
FBgn0261291	0	0	0	0	0	0	0	0	0	0	0	0	0	0	0	0
FBgn0040251	44.7278	38.1609	41.7441	33.9045	38.2025	24.1476	33.8425	28.7772	25.8623	31.7208	36.2857	55.9315	25.7052	29.9981	33.4894	27.9511
FBgn0040257	52.7559	72.3048	69.5736	50.2722	75.5166	82.7917	64.41	60.8749	151.725	40.0684	95.5524	49.5756	129.282	125.825	144.674	84.8515
FBgn0040259	967.955	819.455	1158.13	924.775	794.257	877.074	985.8	990.6	942.249	808.881	968.828	1004.22	989.649	1008.27	1079.7	1156.97
FBgn0027584	1806.32	350.478	150.921	332.031	184.794	287.184	133.187	1586.07	81.0351	1686.21	74.9905	50.8468	4164.99	109.16	72.3371	56.9004
FBgn0040253	14.9093	18.0762	17.1258	11.6912	22.2108	17.2483	14.192	13.2818	34.483	22.5385	16.9333	16.5252	20.4129	23.3318	36.1685	5.98952
FBgn0040255	30.9654	20.0847	17.1258	9.35298	27.5413	13.7986	20.7422	14.3886	30.1727	19.1994	21.7714	13.9829	13.6086	28.3315	13.3958	18.9668
FBgn0026314	1517.3	1413.96	1379.7	1452.05	1505.89	1281.55	1362.43	1467.64	1062.94	1032.6	1174.45	1188.54	1564.24	1734.06	1556.59	1512.35
FBgn0026315	467.922	418.765	333.953	302.803	489.525	501.924	463.97	448.261	292.244	226.22	200.781	235.166	382.553	467.47	329.536	378.338
FBgn0040250	125.008	131.555	113.458	77.1621	132.376	106.939	88.4273	80.7976	181.036	85.9801	84.6666	104.236	129.282	166.656	124.581	117.794
FBgn0040252	160.561	182.771	157.343	111.067	144.814	198.355	131.003	121.75	301.727	151.091	191.105	147.456	187.497	278.316	129.939	225.605
FBgn0037870	65.3714	150.635	71.7143	50.2722	79.9587	86.2413	48.0346	42.059	120.691	86.8149	47.1714	58.4738	65.019	135.825	54.9226	49.9126
FBgn0261808	1446.2	1418.98	1218.07	1352.67	1063.45	1051.28	1075.32	1194.25	1637.94	1833.96	1508.28	1644.89	1671.59	1663.23	1298.05	1598.2
FBgn0037873	5293.94	7135.08	5649.37	5944.99	5972.92	6098.99	5459.56	5360.31	5790.56	5879.2	6184.29	6078.74	6579.77	7538.69	7659.69	6541.55
FBgn0037874	19890.1	30788.8	15192.7	15995.9	24788.1	24834	15811	15779.9	28972.6	26158	15888.3	16943.4	18852.5	22370.2	16156.6	15727.5
FBgn0037875	1067.73	1202.07	985.804	1151.59	1155.85	1101.3	1008.73	1175.44	1179.32	1193.7	1006.32	1085.58	1062.98	1004.1	1038.17	1089.09
FBgn0086472	21646	39188.2	21933.9	23415.2	27759.9	27621.4	21867.7	24144.1	31361.5	29269.1	21512.6	23622.2	22814.8	24103.5	25798.9	21342.6
FBgn0037876	135.33	185.783	131.655	160.17	183.905	157.822	146.287	118.429	231.898	190.325	125.79	151.269	124.746	148.324	121.901	139.755
FBgn0037877	623.895	477.011	573.714	512.075	590.806	626.974	577.506	570.01	605.177	622.73	575.733	588.552	597.267	554.965	590.753	531.07
FBgn0037878	432.369	599.527	470.96	457.127	587.253	590.753	527.288	454.901	650.867	549.271	406.4	390.249	424.135	468.303	448.758	563.015
FBgn0020910	39952.2	30581.9	59607.4	62460.3	34847.8	38050.5	57299.8	66462.1	36312.4	35943.9	53454.9	61228.4	43379.7	27805.7	61337.8	53384.6
FBgn0086055	2.29373	0	4.28145	2.33824	0.88843	0	3.27508	2.21363	0	0.834759	4.83809	3.81351	0	0	2.67915	0
FBgn0051144	1.14687	6.0254	0	0	0.88843	3.44965	0	3.32045	3.4483	4.17379	0	1.27117	1.51207	1.66656	1.33958	0
FBgn0086056	0	0	0	0	0	0	0	0	0	0	0	0	0	0	0	0
FBgn0065064	43.5809	21.0889	26.7591	24.5516	21.3223	24.1476	17.4671	43.1658	15.5174	23.3732	26.6095	33.0504	19.6569	16.6656	32.1498	30.9458
FBgn0086057	9.17493	8.03387	7.49254	4.67649	7.10744	6.03689	14.192	8.85453	3.4483	6.67807	10.8857	8.89819	12.0965	5.83296	5.3583	6.98777
FBgn0037879	191.527	175.741	65.2921	60.7943	142.149	121.6	57.8598	64.1953	127.587	91.8234	53.219	53.3891	71.0672	84.9946	50.9039	58.8969
FBgn0037880	443.837	615.595	462.397	530.781	503.74	524.347	501.088	539.019	575.005	545.097	514.048	526.264	464.961	499.968	563.961	504.118
FBgn0037881	612.427	647.731	716.073	715.503	707.191	703.729	722.702	809.083	757.765	714.553	719.667	710.584	639.605	577.463	719.352	708.759
FBgn0037882	128.449	146.618	112.388	127.434	138.595	136.261	131.003	123.963	141.38	136.9	118.533	125.846	126.258	111.66	127.26	125.78
FBgn0037883	144.505	274.156	85.629	75.9929	245.207	200.942	97.1608	114.002	238.795	199.507	96.7619	102.965	126.258	197.487	83.0537	99.8253
FBgn0037884	503.474	477.011	506.282	472.325	561.488	476.052	539.297	534.592	530.177	547.602	500.743	498.299	500.495	454.971	571.999	543.05
FBgn0037885	186.939	316.334	125.232	153.155	215.889	196.63	165.938	146.1	272.416	218.707	159.657	170.337	161.791	225.819	141.995	158.722
FBgn0051441	135.33	196.83	126.303	101.714	175.909	170.758	149.562	108.468	181.036	161.943	159.657	118.219	126.258	147.491	112.524	113.801
FBgn0051388	198.408	150.635	171.258	154.324	183.905	182.832	186.68	160.488	172.415	168.621	175.381	166.523	167.084	159.99	199.597	188.67
FBgn0037888	24.0842	20.0847	9.63326	8.18385	10.6612	9.48654	5.45847	7.74771	3.4483	13.3561	3.62857	2.54234	6.04827	9.16608	9.37703	0
FBgn0037889	4.58747	7.02964	1.07036	5.84561	3.55372	0	4.36678	5.53408	0.862076	1.66952	1.20952	7.62702	1.51207	2.49984	0	1.99651
FBgn0037890	3307.56	3787.97	3142.58	3534.26	2665.29	2490.65	2575.31	2530.18	3362.96	3327.35	2956.08	3237.67	3018.09	3557.27	2932.33	2967.81
FBgn0037891	5027.86	3984.8	7434.74	7930.15	4156.97	4072.31	6870.03	7722.26	4038.83	4462.62	7557.1	8467.26	6229.72	4459.72	8610.79	8631.89
FBgn0262972	0	0	1.07036	0	1.77686	0.862413	0	0	3.4483	0.834759	0	0	0.756034	0.83328	0	0
FBgn0051386	0	0	0	0	1.77686	0	0	0	0	0	0	0	0	0	0	0.998253
FBgn0266415	0	0	0	0	0	0	0	0	0	0	0	0	0	0	0	0
FBgn0004595	689.267	347.465	603.685	625.48	434.442	464.841	528.38	511.349	396.555	432.405	639.838	574.569	663.798	439.972	533.151	482.156
FBgn0267672	0	0	0	0	0	0	0	0	0	0	0	0	0	0	0	0
FBgn0026064	0	0	0	0	0	0	0	0	0	0	0	0	0	0	0	0
FBgn0026063	0	0	0	0	0	0	0	0	0	0	0	0	0	0	0	0
FBgn0267673	0	1.00423	0	1.16912	0	0	0	0	0	0	0	0	0	0	0	0
FBgn0267674	0	0	0	0	0	0	0	0	0	0	0	0	0	0	0	0
FBgn0037892	463.334	862.637	346.797	336.707	533.947	539.871	350.434	327.618	706.902	674.485	442.686	391.52	395.406	589.129	340.252	333.416
FBgn0264694	1214.53	2010.48	1221.28	1297.73	1600.95	1659.28	1358.07	1449.93	1747.43	1721.27	1163.56	1294.05	1084.15	1356.58	1290.01	1219.86
FBgn0011774	258.045	299.262	385.331	382.303	362.48	271.66	566.589	465.97	375.865	315.539	429.381	427.113	272.928	282.482	334.894	622.91
FBgn0263480	0	0	0	0	0	0	0	0	0.862076	0	0	0	0	0	0	0
FBgn0037894	1558.59	1342.66	2153.57	2167.55	1489.9	1500.6	2228.15	2347.56	1712.08	1609.41	2227.94	2469.88	1487.12	1057.43	1922.29	2111.3
FBgn0037895	261.486	219.927	268.661	237.332	188.347	219.053	200.872	218.043	229.312	200.342	210.457	223.726	255.54	239.151	227.728	184.677
FBgn0267236	0	7.02964	5.35181	2.33824	1.77686	0.862413	2.18339	0	0.862076	0.834759	0	0	1.51207	0.83328	0	1.99651
FBgn0037896	66.5183	43.182	73.855	47.934	56.8595	61.2313	64.41	42.059	43.9659	43.4074	55.6381	52.118	66.531	64.1626	70.9975	54.9039
FBgn0037897	1078.05	517.18	1548.81	1595.85	724.071	699.417	1448.68	1710.03	793.972	760.465	1706.64	1717.35	1125.74	785.783	1448.08	1703.02
FBgn0037898	88.3087	189.8	63.1514	71.3164	121.715	126.775	86.2439	77.4771	142.243	146.083	71.3619	66.1008	83.9198	116.659	68.3183	77.8637
FBgn0037899	3313.3	6624.93	2120.39	2154.69	4713.12	4306.89	2172.47	2209.21	5781.08	5077.84	2323.49	2181.33	2961.39	3449.78	2624.23	1970.55
FBgn0037900	348.647	326.376	337.164	355.413	350.93	351.002	329.692	304.374	361.21	341.416	348.343	400.419	327.363	331.646	325.517	361.368
FBgn0037901	619.308	597.519	767.45	782.143	618.348	645.085	705.235	855.569	725.868	764.639	770.466	809.735	677.407	661.624	821.16	840.529
FBgn0037902	71.1057	59.2498	61.0107	59.6252	55.9711	62.9562	56.7681	52.0204	52.5866	88.4844	70.1524	57.2027	75.6034	73.3287	54.9226	60.8934
FBgn0051374	2672.2	2140.02	2050.81	2194.44	2527.58	2713.15	2305.66	2277.83	1969.84	2096.08	1961.85	2072.01	2642.34	2514.01	2262.54	2179.19
FBgn0046225	198.408	218.923	266.52	267.729	258.533	272.523	286.024	301.054	262.071	212.029	226.181	252.963	191.277	171.656	218.351	230.596
FBgn0263520	13.7624	7.02964	8.5629	9.35298	15.1033	16.3858	13.1003	17.7091	6.03453	1.66952	7.25714	7.62702	7.56034	10.8326	10.7166	12.9773
FBgn0037906	541.321	748.154	423.864	446.605	673.43	719.253	373.36	408.415	444.831	592.679	318.105	399.147	518.64	549.965	412.589	365.361
FBgn0267141	0	0	0	0	0	0	0	0	0	0	0	0	0	0	0	0
FBgn0037908	58.4902	42.1778	33.1812	31.5663	55.9711	43.1207	36.0259	30.9909	37.9313	41.7379	39.9143	33.0504	63.5069	44.1639	28.1311	30.9458
FBgn0053512	149.093	122.517	95.2623	112.236	122.603	111.251	102.619	107.361	100.863	113.527	122.162	83.8972	139.11	151.657	119.222	110.806
FBgn0266416	0	0	0	0	0	0	0	0	0.862076	0	0	0	0	0	0	0
FBgn0037910	0	0	0	0	3.55372	0	0	0	0	0	0	0	0	0	0	0
FBgn0037911	264.926	286.207	336.094	328.523	274.525	264.761	313.316	332.045	254.312	251.262	321.733	352.114	272.172	280.815	321.498	334.415
FBgn0037912	6.8812	19.0804	3.21109	3.50737	7.99587	6.8993	8.73356	2.21363	12.0691	6.67807	3.62857	5.08468	7.56034	4.1664	6.69788	3.99301
FBgn0037913	2793.77	6742.42	2179.26	2248.22	3784.71	3598.85	2247.8	2069.75	5224.18	4710.54	2086.43	2504.21	2783.72	4154.74	1888.8	2235.09
FBgn0263316	597.518	273.152	739.621	700.304	318.947	344.965	662.659	693.974	353.451	335.573	688.219	621.602	607.852	424.14	648.354	739.705
FBgn0037915	1.14687	4.01693	5.35181	9.35298	7.10744	5.17448	12.0086	6.6409	5.17245	5.00855	12.0952	7.62702	3.02414	2.49984	2.67915	6.98777
FBgn0037916	1.14687	0	0	0	0.88843	0	0	0	0	0	1.20952	0	0	0	0	0
FBgn0037917	958.781	745.141	939.778	835.922	808.472	788.246	923.574	829.005	903.455	802.203	1003.9	922.869	949.579	779.117	941.722	884.452
FBgn0037918	883.087	678.862	925.864	943.481	811.137	843.44	855.888	965.144	927.594	915.73	943.428	1024.56	859.611	743.286	813.122	898.428
FBgn0051363	3398.17	3431.47	3284.94	3113.37	3439.11	3760.12	3287.09	3588.3	4300.03	3759.75	3368.52	3544.02	3357.55	3035.64	2948.41	3136.51
FBgn0037920	181.205	181.766	163.765	156.662	217.665	195.768	213.972	163.809	176.726	177.804	187.476	191.947	161.791	149.99	171.466	192.663
FBgn0037921	38.9935	45.1905	43.8849	45.5958	66.6323	65.5434	68.7768	44.2726	75.0006	63.4417	48.3809	57.2027	41.5819	49.1635	60.2809	51.9091
FBgn0037922	364.704	712.002	404.597	377.626	540.166	585.578	463.97	372.997	804.317	643.599	448.733	427.113	431.696	529.133	486.266	399.301
FBgn0037923	92.8962	96.4064	81.3476	52.6105	94.1736	71.5803	75.3269	77.4771	69.8281	76.7978	67.7333	64.8297	73.3353	79.1616	69.6579	63.8882
FBgn0042205	107.805	150.635	75.9957	73.6547	136.818	140.573	92.794	87.4385	170.691	148.587	71.3619	73.7279	100.553	151.657	99.1286	82.855
FBgn0037924	669.77	353.49	999.719	1116.51	585.476	537.283	1314.4	1128.95	583.625	498.351	1164.77	1205.07	650.946	419.14	968.513	1189.92
FBgn0262081	2096.47	1441.08	2256.32	2166.38	1852.38	1986.14	2350.42	2430.57	1894.84	1908.26	2329.54	2441.92	2137.31	1651.56	2428.65	2163.21
FBgn0264986	14.9093	12.0508	6.42218	8.18385	18.657	27.5972	15.2837	9.96135	20.6898	12.5214	16.9333	16.5252	10.5845	9.16608	12.0562	13.9755
FBgn0037926	912.906	587.477	1148.5	1137.56	720.517	720.977	1167.02	1320.43	725.006	747.109	1284.51	1291.51	939.751	545.799	1223.03	1093.09
FBgn0259227	1281.05	800.374	1329.39	1238.1	1160.29	1151.32	1382.09	1403.44	1110.35	1146.96	1358.29	1395.74	1377.49	1098.26	1227.05	1389.57
FBgn0037930	102.071	175.741	66.3625	75.9929	514.401	564.018	176.855	366.356	153.449	139.405	88.2952	80.0837	183.716	363.31	215.672	325.43
FBgn0037931	186.939	122.517	262.239	246.685	162.583	118.151	276.199	281.131	137.932	137.735	290.286	286.013	176.156	133.325	242.463	246.568
FBgn0011290	582.608	720.036	585.488	593.914	700.083	665.783	709.601	619.817	667.247	717.892	722.086	649.568	673.627	665.791	649.694	644.871
FBgn0037933	649.127	898.789	597.262	680.429	716.075	657.159	647.375	606.535	778.454	719.562	679.752	687.703	659.262	820.781	665.769	748.69
FBgn0037934	581.461	531.24	747.113	668.738	555.269	700.279	588.423	555.622	786.213	469.134	809.171	868.209	784.764	929.941	637.638	828.55
FBgn0037935	540.174	381.609	524.478	467.649	466.426	478.639	512.005	545.66	450.004	465.795	630.162	697.872	615.412	561.631	613.526	649.863
FBgn0037936	578.021	836.527	605.825	536.627	554.381	509.686	553.489	539.019	448.279	575.983	535.819	708.042	635.825	901.609	432.683	617.918
FBgn0042110	13.7624	16.0677	12.8444	16.3677	9.77273	4.31207	13.1003	6.6409	25.8623	11.6866	9.67619	6.35585	15.1207	17.4989	14.7353	12.9773
FBgn0037937	2.29373	1.00423	0	0	0	1.72483	1.09169	0	0	1.66952	0	1.27117	0	0.83328	1.33958	0
FBgn0265271	0	0	1.07036	0	0	0.862413	0	0	0.862076	0	2.41905	1.27117	0	0.83328	0	0
FBgn0037939	3.4406	0	1.07036	2.33824	0.88843	0	2.18339	3.32045	0.862076	0	0	0	3.02414	0.83328	0	0.998253
FBgn0267675	0	0	1.07036	0	0	0	0	0	0	0	0	0	0	0	0	0
FBgn0025821	0	0	0	0	0	0	0	1.10682	0	0	0	0	0.756034	0	0	0
FBgn0037940	0	0	0	0	0	0	0	0	0	0	0	0	0	0	0	0
FBgn0037941	92.8962	78.3302	68.5032	85.3459	95.9505	83.6541	66.5934	53.1272	61.2074	92.6582	79.8286	69.9144	99.0405	100.827	84.3933	53.9057
FBgn0037942	498.887	585.468	417.441	422.053	421.116	421.72	371.176	387.386	474.142	484.16	418.495	388.978	407.503	356.644	408.57	383.329
FBgn0002906	396.816	260.097	770.661	719.01	333.161	341.516	910.473	780.305	435.348	364.79	841.828	854.226	412.795	280.815	565.301	910.407
FBgn0037943	869.325	734.095	833.812	795.003	805.806	916.745	812.221	799.121	818.11	781.334	884.162	828.803	793.836	676.624	727.389	733.716
FBgn0037944	643.392	347.465	842.375	939.974	547.273	541.595	961.783	1043.73	475.866	489.169	834.571	927.954	661.53	443.305	881.441	998.253
FBgn0262364	1.14687	3.0127	0	0	4.44215	0.862413	1.09169	1.10682	0.862076	2.50428	0	5.08468	0	0.83328	0	0
FBgn0017581	15474.7	7959.56	18908	18469.8	9977.96	10866.4	19514	19135.7	11807.9	11482.1	20919.9	20680.7	16616.1	8806.11	20113.7	17192.9
FBgn0265276	711.057	440.859	633.655	611.451	548.162	595.065	616.807	551.194	449.141	540.924	613.228	566.942	674.383	551.631	551.905	551.036
FBgn0267155	2.29373	1.00423	1.07036	2.33824	0.88843	0.862413	0	0	0.862076	0.834759	0	0	0	0	0	2.99476
FBgn0037949	779.869	388.638	899.105	803.187	520.62	574.367	829.688	809.083	559.487	534.246	1012.37	925.412	761.327	544.965	851.97	944.347
FBgn0037950	48.1684	61.2583	40.6738	58.4561	71.9629	56.9193	40.3927	47.5931	57.7591	54.2593	55.6381	53.3891	64.2629	60.8295	54.9226	57.8987
FBgn0025802	568.846	250.054	794.209	824.231	407.79	390.673	854.797	883.239	377.589	381.485	909.562	854.226	604.071	364.977	798.387	923.384
FBgn0051116	2066.65	1436.05	1907.39	2017.9	1685.35	1546.31	1735.79	1767.59	1461.22	1704.58	1865.09	1803.79	1977.03	1835.72	1816.46	2024.46
FBgn0259139	2712.34	2305.72	2582.78	2602.47	2515.15	2536.36	2586.22	2552.32	2612.95	2559.37	2676.68	2626.24	2381.51	2179.86	2229.05	2169.2
FBgn0019624	17980.6	41468.8	12014.8	12516.6	27154	24746.9	10884.2	11224.2	29691.6	31384.4	11663.4	12965.9	20310.1	33227.9	14069.6	14060.4
FBgn0037955	2040.28	2265.55	1893.47	2201.46	2000.75	1933.53	2005.44	2126.19	1967.26	1922.45	1959.43	2195.31	1995.93	2119.03	2440.71	2327.93
FBgn0037956	806.247	626.642	595.122	582.223	728.513	620.937	520.738	496.96	556.901	632.747	580.571	586.009	811.225	772.451	531.811	523.084
FBgn0003312	60.7839	107.453	89.9105	105.221	75.5166	87.9661	67.6851	84.118	112.07	108.519	73.7809	113.134	63.5069	69.9955	81.7141	55.9022
FBgn0037958	189.233	158.669	302.913	306.31	153.698	191.456	338.425	292.199	163.794	157.769	303.59	341.945	178.424	140.824	241.124	310.457
FBgn0051368	521.824	292.232	820.968	876.841	344.711	419.133	823.138	920.871	409.486	393.171	798.286	891.09	492.934	275.816	760.879	772.648
FBgn0037960	237.401	262.105	196.947	209.273	241.653	225.952	231.439	225.79	250.002	198.673	174.171	197.031	202.617	198.321	180.843	203.644
FBgn0037962	3.4406	2.00847	0	0	0.88843	0.862413	0	0	0	0.834759	0	1.27117	0.756034	0	1.33958	0.998253
FBgn0037963	1215.68	575.426	1395.75	1494.14	947.067	980.564	1746.71	1710.03	895.697	837.263	1387.32	1531.76	1218.73	906.609	1331.54	1664.09
FBgn0085336	0	0	0	0	0	0	0	0	0	0	0	0	0	0	0	0
FBgn0037964	0	0	0	0	0	0	0	0	0	0	0	0	0	0	0	0
FBgn0051211	2257.03	2031.56	2054.03	1917.36	2369.44	2429.42	1757.63	1913.69	2426.74	2647.02	2065.87	2013.53	2206.86	2229.02	2017.4	1693.04
FBgn0013275	12.6155	15.0635	9.63326	5.84561	26.6529	30.1845	20.7422	19.9227	15.5174	21.7037	19.3524	24.1522	29.4853	24.9984	21.4332	14.9738
FBgn0013276	12.6155	9.0381	14.9851	7.01473	15.9917	17.2483	18.5588	22.1363	7.75868	5.00855	13.3048	22.8811	16.6328	30.8314	21.4332	11.979
FBgn0260741	215.611	184.779	196.947	171.861	221.219	198.355	217.247	233.538	233.623	188.655	247.952	183.048	187.497	172.489	230.407	222.61
FBgn0000147	299.332	475.003	420.653	383.472	456.653	438.106	555.672	470.397	706.902	417.379	508	470.333	300.902	389.975	397.854	549.039
FBgn0260742	856.709	886.738	764.239	769.282	922.191	891.735	787.112	785.839	838.8	837.263	695.476	723.296	789.3	843.28	683.183	722.735
FBgn0260743	1589.56	1424	1841.02	1823.83	1378.84	1383.31	1763.09	1903.72	1364.67	1366.5	1793.72	1833.03	1512.82	1205.76	1729.39	1743.95
FBgn0260744	1152.6	1465.18	1031.83	889.702	1269.57	1183.23	966.15	1086.89	1229.32	1290.54	1043.82	977.53	1105.32	1371.58	1046.21	1109.06
FBgn0037970	1.14687	1.00423	0	0	0	2.58724	2.18339	0	0	0	1.20952	1.27117	1.51207	0	1.33958	3.99301
FBgn0037972	25.2311	52.2201	25.6887	29.228	39.9794	31.9093	25.109	24.35	46.5521	34.2251	31.4476	21.6099	32.5095	28.3315	14.7353	22.9598
FBgn0264984	3.4406	10.0423	5.35181	4.67649	1.77686	4.31207	1.09169	5.53408	11.207	5.84331	1.20952	5.08468	2.2681	11.6659	1.33958	0.998253
FBgn0037973	620.455	910.84	691.454	679.26	597.914	565.743	577.506	688.44	694.833	513.377	424.543	636.856	553.417	824.947	454.116	849.513
FBgn0037974	159.414	492.074	220.495	216.288	193.678	185.419	127.728	120.643	228.45	163.613	104.019	118.219	139.866	278.316	129.939	140.754
FBgn0037975	503.474	1001.22	564.081	536.627	400.682	399.297	403.927	430.551	558.625	568.471	382.209	486.858	471.765	729.953	341.592	469.179
FBgn0260745	3252.51	2171.15	4218.3	4208.84	2466.28	2772.66	3729.23	4411.77	2662.09	2743.02	3650.34	4752.9	3552.61	2508.17	3784.3	3986.02
FBgn0037976	248.87	289.219	177.68	163.677	274.525	202.667	157.204	94.0794	193.967	248.758	151.19	133.473	213.958	248.317	148.693	143.748
FBgn0260746	517.237	531.24	574.785	521.428	462.872	478.639	502.179	449.367	574.142	500.02	572.105	582.196	452.109	339.978	495.643	380.334
FBgn0037978	324.563	352.486	366.064	438.421	422.004	403.609	399.56	495.854	394.831	338.912	365.276	396.605	385.578	359.144	446.079	513.102
FBgn0037979	768.401	470.986	815.616	789.157	733.844	911.571	858.072	1018.27	760.351	712.049	858.762	948.293	807.445	709.955	839.914	980.284
FBgn0037980	211.023	249.05	194.806	192.905	319.835	303.569	278.382	272.277	347.417	262.114	227.39	245.336	210.934	233.318	245.142	304.467
FBgn0037981	134.183	167.707	154.132	153.155	180.351	184.556	191.047	170.45	175.001	148.587	176.59	183.048	158.767	164.989	203.615	197.654
FBgn0051358	0	0	0	0	0	0	0	0	0	0	0	0	0	0	0	0
FBgn0260230	0	0	0	0	0	0	0	0	0	0	0	0	0	0	0	0
FBgn0260231	0	0	0	0	0	0	0	0	0	0	0	0	0	0	0	0
FBgn0037985	0	4.01693	0	1.16912	0	0	0	1.10682	0.862076	1.66952	1.20952	1.27117	1.51207	0	4.01873	0.998253
FBgn0037986	1.14687	0	0	0	0.88843	0	0	0	1.72415	0	1.20952	0	0	0	0	0
FBgn0037987	0	0	0	0	0	0	0	0	0	0	0	0	0	0	0	0
FBgn0037988	2.29373	0	1.07036	0	1.77686	0.862413	0	0	0	0.834759	0	0	3.02414	1.66656	4.01873	2.99476
FBgn0037989	910.612	404.706	748.183	697.966	932.852	963.315	839.513	1079.15	671.557	603.53	751.114	700.415	1083.4	774.951	909.572	1058.15
FBgn0051361	90.6025	63.2667	73.855	74.8238	65.7439	73.3051	68.7768	63.0885	59.4832	67.6154	77.4095	72.4567	87.7	83.328	65.6392	48.9144
FBgn0037992	50.4621	24.1016	38.5331	30.3972	49.7521	40.5334	32.7508	47.5931	25.0002	25.0428	12.0952	27.9657	45.3621	43.3306	33.4894	29.9476
FBgn0011905	0	0	0	0	0	0	0	0	0	0	0	0	0	0	0	0
FBgn0037993	77.9869	43.182	42.8145	46.7649	39.9794	68.1306	45.8512	59.7681	43.1038	45.9117	60.4762	45.7621	80.1396	65.8291	61.6205	49.9126
FBgn0261714	914.053	513.163	1132.44	1137.56	573.926	634.736	1014.18	902.055	708.626	640.26	1255.49	1220.32	963.944	707.455	1169.45	1002.25
FBgn0037994	0	1.00423	0	0	0	0	0	0	0	0	0	0	0	0	0	0
FBgn0263404	0	0	0	0	0	0	0	0	0	0	0	0	0	0	0	0
FBgn0037995	0	1.00423	1.07036	0	0	0	1.09169	0	0.862076	0	1.20952	0	0	0	0	0
FBgn0051356	1.14687	0	3.21109	1.16912	0	0.862413	0	1.10682	0	0.834759	0	0	0	0	0	0.998253
FBgn0037996	868.178	1161.9	807.053	870.996	1106.1	1095.26	870.08	822.364	710.35	1047.62	740.228	622.873	880.024	997.436	1148.02	707.761
FBgn0037998	596.371	466.969	668.977	678.091	522.397	543.32	709.601	716.11	457.762	483.325	678.543	720.753	592.731	502.468	695.24	721.737
FBgn0037997	241.989	295.245	113.458	164.846	198.12	181.107	87.3356	66.409	193.967	219.542	82.2476	80.0837	169.352	260.817	100.468	91.8393
FBgn0037999	245.429	365.541	260.098	236.163	299.401	246.65	264.19	257.888	308.623	318.043	235.857	306.352	241.931	318.313	297.386	223.609
FBgn0267676	0	0	0	0	0.88843	0	0	0	0	0	0	0	0	0	0	0
FBgn0038000	2.29373	0	1.07036	2.33824	3.55372	1.72483	1.09169	0	0	0.834759	0	1.27117	0.756034	0	1.33958	1.99651
FBgn0038001	2.29373	3.0127	1.07036	4.67649	5.33058	4.31207	1.09169	1.10682	1.72415	2.50428	0	1.27117	1.51207	4.1664	1.33958	5.98952
FBgn0038002	5.73433	4.01693	8.5629	3.50737	5.33058	5.17448	2.18339	2.21363	6.89661	3.33903	6.04762	3.81351	3.02414	4.1664	4.01873	1.99651
FBgn0263454	0	0	0	0	0	0	0	0	0	0	0	0	0	0	0	0
FBgn0038003	0	0	0	2.33824	0	0	1.09169	0	0	0	2.41905	0	0	0	0	0
FBgn0011270	0	0	0	0	0	0	0	0	0	0	0	0	0	0	0	0
FBgn0038005	0	0	1.07036	0	0	0	0	0	0	1.66952	0	0	0	0	0	0
FBgn0038006	1.14687	0	1.07036	0	0	0	1.09169	0	1.72415	0	0	0	0	0	0	0
FBgn0038007	19.4967	24.1016	17.1258	7.01473	11.5496	25.01	18.5588	11.0682	37.0693	30.8861	42.3333	12.7117	23.4371	27.4982	24.1124	25.9546
FBgn0264828	0	0	0	0	0	0	0	0	0	0	0	0	0	0	0	0
FBgn0267142	11.4687	14.0593	4.28145	3.50737	5.33058	9.48654	0	0	5.17245	7.51283	3.62857	6.35585	5.29224	12.4992	0	4.99126
FBgn0038008	0	0	0	0	0	0.862413	0	0	0	0	0	0	0.756034	0	0	0
FBgn0003651	674.358	425.795	616.529	671.076	576.591	451.042	560.039	745.994	377.589	633.582	752.324	613.975	777.959	644.959	762.218	765.66
FBgn0264829	1.14687	0	0	0	0.88843	0	0	1.10682	0	0	0	0	0	0	0	0
FBgn0264830	0	0	0	2.33824	0	0	0	0	0	0	0	0	0	0.83328	1.33958	0
FBgn0267677	0	0	0	1.16912	0	0	0	2.21363	0	0	2.41905	0	3.02414	0	0	0
FBgn0264831	1.14687	0	0	1.16912	0	0.862413	1.09169	0	0.862076	0	0	3.81351	0	2.49984	0	0
FBgn0038009	6.8812	5.02117	3.21109	1.16912	1.77686	2.58724	3.27508	0	0.862076	2.50428	1.20952	3.81351	1.51207	1.66656	5.3583	0.998253
FBgn0259975	0	0	0	0	0	0	0	0	0	0	0	0	0	0	0	0
FBgn0267678	1.14687	0	0	0	0	0	0	0	0	0	0	0	0	0	0	0
FBgn0038011	21.7905	105.445	126.303	121.589	86.1778	168.171	139.737	55.3408	397.417	56.7636	270.933	115.676	20.4129	159.157	70.9975	265.535
FBgn0051432	0	0	0	0	0	0	0	0	0	0	0	0	0	0	0	0
FBgn0038012	0	7.02964	17.1258	18.706	3.55372	9.48654	16.3754	12.175	6.03453	2.50428	21.7714	15.254	6.04827	10.8326	8.03745	11.979
FBgn0267144	0	0	0	0	0	1.72483	0	0	0	0	0	0	0	0	0	0
FBgn0267143	0	0	0	0	0.88843	0	0	0	0	0	0	0	0	0	0	0
FBgn0266246	0	0	0	0	0	0	0	0	0	0	0	0	0	0	0	0
FBgn0266261	0	0	0	0	0	0	0	0	0	0	0	0	0	0	0	0
FBgn0038013	356.676	616.599	342.516	390.487	541.943	507.099	367.901	329.831	662.074	518.385	388.257	331.775	350.8	487.469	346.95	354.38
FBgn0038014	1.14687	4.01693	1.07036	4.67649	0.88843	1.72483	0	0	2.58623	0	3.62857	3.81351	0.756034	0.83328	0	1.99651
FBgn0038016	1043.65	798.366	1248.04	1261.48	967.501	933.993	1395.19	1330.39	1019.84	960.807	1376.44	1261	1069.03	779.95	1232.41	1199.9
FBgn0038017	154.827	152.644	140.218	139.126	131.488	102.627	138.645	135.032	110.346	146.918	139.095	152.54	180.692	200.821	156.73	154.729
FBgn0065094	0	0	0	0	0	0	0	0	0	0	0	0	0	0	0	0
FBgn0038018	0	0	0	0	0	0	0	0	0	0	0	0	0.756034	0	0	0
FBgn0042206	135.33	255.075	189.454	169.523	184.794	187.144	141.92	171.557	107.759	179.473	95.5524	153.812	89.2121	313.313	115.203	212.628
FBgn0038020	293.598	826.484	347.868	368.273	462.872	414.821	305.674	306.588	455.176	542.593	269.724	320.335	282.001	672.457	235.765	341.402
FBgn0001149	8448.97	18772.1	8050.2	7642.55	16875.7	15258.7	10323.1	10621	15476	13018.9	7530.49	8302.01	9767.96	16781.4	7642.28	11919.1
FBgn0267679	3.4406	0	1.07036	3.50737	3.55372	1.72483	0	3.32045	6.03453	3.33903	2.41905	0	2.2681	0	5.3583	2.99476
FBgn0010038	42.4341	82.3472	62.081	44.4266	71.0744	51.7448	38.2093	53.1272	120.691	268.792	85.8762	269.488	136.086	197.487	115.203	51.9091
FBgn0010039	227.08	411.736	139.147	109.897	678.761	734.776	267.465	396.24	653.453	313.869	183.848	189.404	282.001	489.135	237.105	461.193
FBgn0010040	2.29373	10.0423	4.28145	7.01473	6.21901	6.8993	5.45847	13.2818	7.75868	10.8519	3.62857	5.08468	2.2681	11.6659	10.7166	14.9738
FBgn0010041	27.5248	28.1185	7.49254	23.3824	19.5455	23.2852	8.73356	35.4181	27.5864	60.1026	15.7238	82.6261	26.4612	62.496	9.37703	28.9493
FBgn0010042	2.29373	2.00847	8.5629	5.84561	0.88843	3.44965	1.09169	4.42726	3.4483	0.834759	4.83809	1.27117	1.51207	0.83328	2.67915	0.998253
FBgn0010043	67.6651	151.639	63.1514	72.4856	115.496	102.627	72.0518	60.8749	93.1042	94.3277	43.5428	91.5242	51.4103	154.99	44.206	116.796
FBgn0010044	36.6997	110.466	46.0256	42.0884	46.1984	55.1944	27.2924	35.4181	61.2074	60.9374	38.7048	54.6603	29.4853	86.6611	34.829	62.8899
FBgn0038028	9.17493	6.0254	5.35181	9.35298	5.33058	13.7986	6.55017	9.96135	6.89661	6.67807	7.25714	8.89819	3.78017	4.99968	10.7166	11.979
FBgn0038029	45.8747	70.2964	38.5331	31.5663	49.7521	47.4327	31.6591	37.6317	46.5521	40.9032	33.8667	25.4234	43.094	55.8298	36.1685	27.9511
FBgn0085431	50.4621	66.2794	63.1514	70.1473	71.9629	65.5434	51.3096	64.1953	45.69	41.7379	62.8952	41.9486	55.9465	74.9952	76.3558	62.8899
FBgn0053098	231.667	273.152	191.595	202.258	181.24	225.952	149.562	141.672	195.691	224.55	143.933	157.625	252.515	285.815	164.768	183.679
FBgn0038032	0	0	0	0	0	0	0	0	0	0	0	0	0	0	0	0
FBgn0038033	0	0	0	0	0	0	0	0	0	0	0	0	0	0	0	0
FBgn0038034	258.045	249.05	199.087	197.582	236.322	227.677	224.889	210.295	248.278	217.872	250.371	240.251	246.467	273.316	174.145	237.584
FBgn0038035	441.544	336.418	424.934	401.009	432.666	371.7	526.197	581.078	402.589	321.382	459.619	461.435	469.497	345.811	428.664	504.118
FBgn0038037	4035.82	4697.8	3149.01	2674.95	3892.21	3639.38	2628.8	2785.86	4370.72	4172.96	3188.3	3408.01	4071.25	4789.69	3011.37	3265.28
FBgn0038038	1724.89	2472.42	1641.94	1789.93	2057.6	1904.21	1406.1	1636.98	2204.33	2284.73	1621.97	1653.79	1840.19	2598.17	1786.99	1865.73
FBgn0038039	834.919	1130.77	847.727	895.547	1050.12	965.04	779.47	879.919	1184.49	1163.65	821.266	819.905	882.292	952.439	853.31	833.541
FBgn0000455	1031.03	1110.68	1101.4	1037.01	988.823	902.084	1032.74	1158.84	965.525	1032.6	938.59	985.157	1029.72	1069.1	1085.06	1326.68
FBgn0065087	0	0	0	0	0	0	0	0	0	0	0	0	0	0	0	0
FBgn0082831	1362.48	653.756	2118.25	2183.92	1045.68	1192.72	2317.67	2320.99	1106.91	1121.08	2334.38	2467.34	1431.93	864.112	1998.65	2177.19
FBgn0038042	52.7559	48.2032	68.5032	61.9635	52.4174	47.4327	67.6851	57.5544	37.9313	43.4074	45.9619	44.491	73.3353	38.3309	79.0349	55.9022
FBgn0038043	1074.61	2298.69	900.175	939.974	1684.46	1560.97	879.906	950.755	2036.22	2028.46	870.857	966.089	980.577	1373.25	904.213	901.422
FBgn0004103	5370.78	5618.69	4765.25	4751.31	5866.31	6182.64	5261.97	5262.91	5972.46	5839.97	5027.99	5383.41	5201.52	5412.99	4964.47	4882.45
FBgn0038045	4.58747	8.03387	5.35181	1.16912	6.21901	6.8993	3.27508	12.175	6.03453	4.17379	12.0952	6.35585	0.756034	9.16608	14.7353	7.98602
FBgn0038046	769.548	1033.36	798.491	854.628	987.046	955.554	876.631	834.539	1071.56	949.121	807.962	784.312	743.182	851.612	723.371	830.546
FBgn0038047	21.7905	16.0677	34.2516	22.2133	30.2066	26.7348	60.0432	28.7772	14.6553	14.1909	26.6095	25.4234	17.3888	18.3322	28.1311	26.9528
FBgn0086134	2604.53	3176.39	3188.61	3156.63	3018	3061.57	3720.49	3868.32	2749.16	2439.16	2833.91	2849.96	2609.07	2873.98	3107.81	3410.03
FBgn0029512	1017.27	1878.92	1099.26	1116.51	1468.58	1298.79	1344.97	1130.06	1868.98	1469.18	1179.29	1240.66	966.968	1233.25	1042.19	1218.87
FBgn0038049	978.277	1354.71	878.768	931.79	1178.06	1109.93	872.264	929.726	1212.08	1231.27	823.686	917.785	874.732	1029.1	826.518	953.331
FBgn0043043	3.4406	4.01693	1.07036	1.16912	0.88843	0	1.09169	0	2.58623	0	2.41905	0	1.51207	0.83328	0	2.99476
FBgn0038051	5.73433	5.02117	3.21109	0	6.21901	1.72483	2.18339	3.32045	6.03453	1.66952	1.20952	3.81351	3.02414	7.49952	0	4.99126
FBgn0086687	31298	31659.5	23265.4	22475.2	28899.8	28658.8	22646.1	23138	34174.4	26511.1	20122.8	18260.4	34186.4	38224.2	29024.6	26503.6
FBgn0038052	4.58747	4.01693	2.14073	1.16912	10.6612	1.72483	6.55017	6.6409	12.9311	0.834759	7.25714	1.27117	10.5845	9.16608	2.67915	4.99126
FBgn0038053	1087.23	902.806	1092.84	999.599	911.53	953.829	1144.1	1159.94	1053.46	864.81	1034.14	1095.75	1064.5	1022.43	1046.21	1106.06
FBgn0038054	10.3218	2.00847	5.35181	1.16912	2.66529	4.31207	6.55017	4.42726	2.58623	1.66952	1.20952	0	2.2681	4.1664	4.01873	4.99126
FBgn0038055	403.697	421.778	403.527	436.082	419.339	476.914	508.73	430.551	387.934	421.553	494.695	433.469	380.285	318.313	403.212	421.263
FBgn0038056	607.839	607.561	629.373	620.804	630.786	602.827	600.432	682.906	575.005	599.357	682.171	563.128	543.589	537.466	695.24	598.952
FBgn0038057	289.01	270.139	337.164	315.663	263.864	288.908	316.591	340.899	326.727	266.288	354.39	341.945	279.733	187.488	289.348	294.485
FBgn0038058	337.179	317.338	401.386	429.068	357.149	382.911	444.32	450.474	350.003	345.59	414.867	429.655	362.896	384.142	373.742	534.065
FBgn0013277	0	1.00423	0	0	0	0	1.09169	0	0	0.834759	0	2.54234	0	0	0	0.998253
FBgn0052865	9.17493	6.0254	2.14073	7.01473	9.77273	11.2114	0	2.21363	14.6553	11.6866	1.20952	3.81351	13.6086	14.999	0	0
FBgn0051354	0	0	0	0	2.66529	1.72483	3.27508	1.10682	0	1.66952	4.83809	0	4.53621	1.66656	0	1.99651
FBgn0013278	10.3218	23.0974	14.9851	10.5221	28.4298	29.322	19.6505	17.7091	17.2415	21.7037	10.8857	26.6946	26.4612	30.8314	33.4894	6.98777
FBgn0013279	10.3218	10.0423	4.28145	9.35298	20.4339	9.48654	10.9169	7.74771	6.03453	5.00855	8.46666	6.35585	9.07241	12.4992	9.37703	3.99301
FBgn0250910	116.98	46.1947	82.4179	105.221	94.1736	62.9562	90.6106	87.4385	73.2764	68.4502	77.4095	110.592	123.234	75.8285	89.7516	78.862
FBgn0028374	58.4902	36.1524	42.8145	31.5663	33.7604	45.7079	39.301	25.4568	39.6555	55.0941	37.4952	43.2198	42.3379	47.497	58.9413	30.9458
FBgn0267680	0	0	0	0	0	0	0	0	0	0	0	0	0	0	0	0
FBgn0038063	339.473	291.228	179.821	209.273	261.199	286.321	209.605	174.877	252.588	255.436	200.781	160.167	267.636	348.311	170.126	164.712
FBgn0262383	0	0	0	0	0	0	0	0	0	0	0	0	0	0	0	0
FBgn0267681	0	0	0	0	0	0	0	0	0	0	0	0	0	0	0	0
FBgn0266247	0	0	0	0	0	0	0	0	0	0	0	0	0	0	0	0
FBgn0005671	14905.8	11098.8	18567.6	19539.5	12154.6	12436	16391.8	17983.5	11651.8	12352.8	16520.9	17115	16396.9	11979.2	18251.7	17745.9
FBgn0038065	1745.53	2636.11	1543.46	1543.24	2093.14	2004.25	1408.29	1546.22	2302.6	2274.72	1456.27	1599.13	1754	1950.71	1450.76	1513.35
FBgn0260444	473.656	500.108	579.066	579.885	510.847	514.861	577.506	519.097	540.522	541.758	527.352	635.585	521.664	381.642	636.298	484.153
FBgn0042207	2.29373	3.0127	6.42218	3.50737	3.55372	7.76172	5.45847	5.53408	3.4483	7.51283	2.41905	10.1694	4.53621	2.49984	2.67915	4.99126
FBgn0267682	0	0	0	0	0	0	0	0	0	0	0	0	0	0	0	0
FBgn0038067	0	0	1.07036	0	0	1.72483	1.09169	2.21363	0	0	0	0	0	0	0	0
FBgn0038068	0	0	0	0	0	0	0	0	0	0	0	0	0	0	0	0
FBgn0038069	0	0	0	0	0	0	0	0	0	0	0	0	0	0	0	0
FBgn0038070	35.5529	33.1397	39.6034	36.2428	31.0951	43.9831	30.5674	35.4181	31.8968	20.869	29.0286	20.3387	33.2655	43.3306	32.1498	32.9423
FBgn0038071	73.3995	62.2625	53.5181	56.1179	65.7439	60.3689	60.0432	54.234	66.3798	53.4246	68.9428	64.8297	86.944	80.8282	64.2996	63.8882
FBgn0038072	574.58	449.897	594.051	537.796	614.794	609.726	655.017	667.41	464.659	486.664	603.552	627.958	766.619	711.621	731.408	728.725
FBgn0267146	0	0	0	0	0	0	0	0	0	0	0	0	0	0	0	0
FBgn0038073	4.58747	2.00847	3.21109	2.33824	8.8843	0.862413	2.18339	1.10682	0	1.66952	4.83809	2.54234	0.756034	4.99968	1.33958	0.998253
FBgn0038074	565.405	772.256	307.194	492.2	272.748	313.056	240.173	376.317	300.002	511.707	156.029	297.454	955.627	274.982	210.313	204.642
FBgn0263621	181.205	392.655	135.936	87.6841	198.12	194.043	88.4273	70.8362	266.381	208.69	93.1333	81.3549	143.647	225.819	109.845	83.8532
FBgn0026207	387.641	376.588	653.992	713.164	344.711	374.287	660.475	713.896	452.59	368.963	653.143	711.855	398.43	315.813	585.394	650.861
FBgn0038076	175.471	134.567	115.599	125.096	114.608	162.996	106.986	151.634	103.449	143.578	122.162	128.388	151.207	169.156	127.26	131.769
FBgn0001296	1867.1	1932.15	2095.77	2179.24	1887.03	1983.55	1830.77	1920.33	2360.36	2252.18	2220.69	2200.4	2006.52	1574.07	2081.7	1675.07
FBgn0005355	545.909	749.158	606.896	605.605	673.43	645.947	593.882	669.624	744.833	706.206	579.362	616.517	517.884	595.795	592.092	688.794
FBgn0051347	0	1.00423	0	0	0	0.862413	0	0	0	0	0	0	0	0	0	0
FBgn0011745	1763.88	2191.24	2058.31	2128.97	1989.2	1956.82	1872.26	2192.6	2084.5	1966.69	1972.73	2019.89	1885.55	1979.04	2008.02	2127.28
FBgn0038078	0	0	0	0	0.88843	0	0	0	0	0	0	0	0.756034	0.83328	0	0
FBgn0038079	157.121	153.648	62.081	59.6252	250.537	192.318	111.353	109.575	154.312	126.049	78.619	99.1513	136.086	229.152	72.3371	102.82
FBgn0016693	2956.62	2813.86	2856.8	3047.9	3114.84	2945.14	3072.03	3397.93	2900.89	2961.72	2763.76	2811.83	3554.12	3102.3	2864.01	3289.24
FBgn0038080	241.989	486.049	239.761	240.839	336.715	335.479	209.605	211.402	387.072	380.65	226.181	273.302	264.612	312.48	265.236	243.574
FBgn0002905	366.997	119.504	506.282	617.296	228.327	206.979	518.555	589.933	252.588	237.906	506.79	691.517	309.974	158.323	430.004	600.948
FBgn0002719	17862.4	15820.7	16515.7	17297.2	17989.8	17158.6	16796.8	22404.2	11894.9	12720.1	11165.1	12154.9	17761.5	22745.2	16801	24156.7
FBgn0265162	3.4406	1.00423	0	0	0.88843	2.58724	5.45847	1.10682	0	0	2.41905	2.54234	0	0.83328	0	4.99126
FBgn0038082	290.157	340.435	329.672	368.273	199.008	209.566	212.88	294.413	388.796	308.861	235.857	341.945	305.438	524.967	298.725	515.098
FBgn0038083	469.068	673.841	552.307	514.414	648.554	523.485	598.249	893.201	383.624	499.186	355.6	613.975	411.283	1062.43	365.704	1337.66
FBgn0038084	37.8466	27.1143	26.7591	36.2428	22.2108	40.5334	22.9256	25.4568	35.3451	42.5727	37.4952	38.1351	41.5819	39.1642	32.1498	22.9598
FBgn0265164	0	0	0	0	0	0	0	0	0	0.834759	0	0	0	0	0	0
FBgn0265163	0	0	0	0	1.77686	0	0	0	0	0	0	0	0	0	0	0
FBgn0051345	186.939	286.207	129.514	135.618	189.236	226.815	151.746	100.72	222.416	190.325	163.286	101.694	193.545	257.484	84.3933	112.803
FBgn0038087	58.4902	44.1863	39.6034	28.0589	39.0909	43.1207	38.2093	32.0977	37.0693	45.077	52.0095	26.6946	43.85	60.8295	33.4894	29.9476
FBgn0267147	0	0	0	0	0	0	0	0	0	0	0	0	0	0	0	0
FBgn0265165	0	0	0	0	0	0	0	0	0	0	0	0	0	0	0	0
FBgn0038088	458.747	555.341	272.942	264.222	484.195	408.784	258.732	334.258	379.313	409.032	266.095	216.099	471.765	473.303	318.819	241.577
FBgn0265166	0	0	0	0	0	0	0	0	0	0	0	0	0	0	0	0
FBgn0038089	0	1.00423	0	0	0	0.862413	1.09169	1.10682	0	0.834759	0	1.27117	0.756034	0	0	1.99651
FBgn0053929	0	0	0	0	0	0	0	0	0	0	0	0	0	0	0	0
FBgn0038090	0	0	0	0	0	0	0	0	0	0	0	0	0	0	0	0
FBgn0038092	52.7559	43.182	52.4478	39.7501	39.0909	51.7448	39.301	34.3113	36.2072	32.5556	44.7524	27.9657	49.8983	62.496	21.4332	36.9354
FBgn0265167	0	0	0	0	0	0	0	0	0	0	0	0	0	0	0	0
FBgn0040493	2055.19	3024.75	2660.92	2595.45	2531.14	2599.31	2536.01	2780.32	2960.37	2598.6	2100.94	2632.59	2020.12	2331.52	2199.58	2630.4
FBgn0087021	142.211	292.232	158.414	147.309	230.992	223.365	201.963	139.459	363.796	190.325	163.286	172.879	146.671	187.488	154.051	169.703
FBgn0038095	142.211	79.3345	104.896	122.758	57.748	68.1306	100.436	95.1862	52.5866	84.3106	72.5714	109.321	89.9681	87.4944	151.372	89.8428
FBgn0038097	1.14687	0	0	2.33824	0.88843	0	0	1.10682	0	0	0	0	0	0	0	0.998253
FBgn0038098	924.375	1152.86	866.994	1015.97	1147.85	1321.22	816.587	1080.25	988.801	1115.24	729.343	992.784	1147.66	1954.04	933.684	1283.75
FBgn0038099	739.729	779.285	1299.42	1267.33	765.827	765.823	1389.73	1472.07	1025.01	869.818	1283.3	1411	721.257	614.961	1160.07	1310.71
FBgn0038100	1541.39	1736.32	1215.93	1103.65	1821.28	2172.42	1505.45	1184.29	2296.57	1581.87	1456.27	1215.24	1707.88	1660.73	1083.72	1202.89
FBgn0051342	1208.8	851.59	1896.68	1986.34	1053.68	1126.31	1877.71	1966.81	1197.42	1152.8	1913.47	2125.4	1329.11	806.615	1813.79	1872.72
FBgn0038102	0	0	0	0	0	0	0	0	0	0	0	0	0	0	0	0
FBgn0041710	129.596	105.445	55.6589	63.1326	87.9546	103.49	73.1435	161.595	62.9315	99.3363	50.8	50.8468	177.668	112.493	53.583	106.813
FBgn0038105	324.563	354.494	392.823	343.722	350.042	383.774	359.167	379.638	313.796	278.809	249.162	343.216	400.698	465.804	267.915	436.236
FBgn0038106	325.71	318.342	412.09	427.899	346.488	318.23	442.136	401.774	287.933	291.331	397.933	372.453	362.14	277.482	384.458	401.298
FBgn0265083	0	0	0	0	0	0	0	0	0	0	0	0	0	0	0	0
FBgn0038107	0	0	0	0	0	0	0	0	0	0	0	0	0	0	0	0
FBgn0038108	1925.59	871.675	2899.61	3129.74	1594.73	1724.83	3064.39	3158.85	1588.81	1604.41	3002.04	3448.68	2237.86	1329.08	3117.19	3058.65
FBgn0038110	723.673	1337.64	788.857	772.79	945.29	946.93	687.768	784.733	1078.46	1086.02	649.514	761.431	783.252	1002.44	659.071	775.642
FBgn0038109	0	0	1.07036	1.16912	0.88843	0	1.09169	0	2.58623	0	0	0	0	0.83328	0	0
FBgn0020496	4024.36	3439.5	3814.77	3738.85	3815.81	3867.06	3876.61	3477.62	3969	3965.1	4005.94	3723.26	4059.9	3263.96	3204.26	3445.97
FBgn0038111	1264.99	1114.7	1207.37	1436.85	1083	1162.53	1375.54	1385.73	1111.22	1198.71	1347.41	1431.34	1183.19	1133.26	1193.56	1342.65
FBgn0002354	270.661	467.973	217.284	233.824	335.827	293.22	191.047	175.984	368.106	353.938	224.971	223.726	231.347	377.476	222.37	200.649
FBgn0003308	638.805	376.588	842.375	821.893	368.699	432.069	786.02	767.024	254.312	381.485	754.743	913.971	681.187	399.974	699.258	786.623
FBgn0038113	66.5183	81.3429	71.7143	70.1473	55.0827	90.5534	49.1263	77.4771	71.5523	62.6069	68.9428	82.6261	84.6758	92.4941	79.0349	63.8882
FBgn0003450	147.946	192.813	165.906	166.015	174.132	158.684	192.138	185.945	283.623	210.359	179.009	204.658	142.134	151.657	184.861	148.74
FBgn0038114	3.4406	3.0127	1.07036	10.5221	0	0.862413	2.18339	2.21363	0	1.66952	2.41905	1.27117	3.78017	3.33312	5.3583	3.99301
FBgn0266615	3.4406	1.00423	0	0	1.77686	3.44965	2.18339	3.32045	0.862076	0.834759	0	2.54234	0.756034	0.83328	1.33958	0
FBgn0001217	44.7278	55.2328	46.0256	65.4708	56.8595	45.7079	50.2179	49.8067	53.4487	53.4246	42.3333	33.0504	40.0698	49.1635	52.2434	41.9266
FBgn0051157	121.568	138.584	116.67	112.236	114.608	106.939	90.6106	91.8657	83.6214	102.675	101.6	106.778	142.134	152.49	100.468	137.759
FBgn0038115	768.401	917.87	747.113	742.392	707.191	744.262	811.129	795.801	735.351	697.858	677.333	758.889	764.351	901.609	740.785	944.347
FBgn0260962	1909.53	1471.2	2671.63	2856.16	1616.05	1679.98	2624.43	2876.62	1833.64	1683.71	2647.65	3022.84	1893.11	1160.76	2208.96	2440.73
FBgn0004666	175.471	143.605	177.68	223.302	200.785	176.795	267.465	203.654	283.623	186.151	247.952	264.403	171.62	188.321	179.503	286.499
FBgn0266302	0	0	0	0	0	0	0	0	0	0	0	0	0	0	0	0
FBgn0262365	0	0	0	0	0	0	0	0	0	0	0	0	0	0	0	0
FBgn0038118	498.887	394.664	659.343	785.65	440.661	429.482	766.37	680.692	519.832	474.143	820.057	788.125	495.203	302.481	663.09	703.768
FBgn0085337	0	0	0	0	1.77686	3.44965	0	0	0.862076	0.834759	1.20952	0	2.2681	3.33312	0	0
FBgn0267683	0	0	0	0	0	0	0	0	0	0	1.20952	0	0	0	0	0
FBgn0260793	185.792	97.4107	194.806	160.17	121.715	140.573	195.413	139.459	111.208	101.841	172.962	174.15	173.132	132.492	230.407	173.696
FBgn0266578	0	0	0	0	0	0	0	0	0	0	0	0	0	0	0	0
FBgn0038122	0	0	0	0	0	0	0	0	0.862076	0	0	0	0	0	0	0
FBgn0038123	0	0	0	0	0	0	0	0	0	0	0	0	0	0	0	0
FBgn0038124	0	0	0	0	0	0	0	0	0	0	0	0	0	0	0	0
FBgn0038125	0	0	0	0	0	0	0	0	0	0	0	0	0	0	0	0
FBgn0038126	220.198	133.563	158.414	153.155	175.909	217.328	194.322	143.886	97.4146	147.752	151.19	194.489	263.856	175.822	170.126	223.609
FBgn0038127	0	0	2.14073	0	0	0	1.09169	1.10682	0	0	1.20952	1.27117	1.51207	0	0	0.998253
FBgn0000024	1370.51	680.87	1174.19	1088.45	843.12	898.634	1067.68	1032.66	710.35	851.454	1216.78	1044.9	1266.36	953.273	1123.9	985.276
FBgn0040551	479.39	744.137	254.746	274.744	589.918	605.414	279.474	317.656	518.108	659.459	231.019	245.336	657.75	619.127	302.744	269.528
FBgn0038128	159.414	235.995	173.399	144.971	207.004	196.63	159.387	177.091	279.313	255.436	188.686	137.286	156.499	196.654	139.316	155.727
FBgn0003598	902.584	550.32	1607.68	1590.01	853.782	907.259	1969.42	1705.6	956.904	794.69	1651	1698.28	929.166	611.628	1425.31	1765.91
FBgn0038129	1113.61	736.103	1046.81	1039.35	740.063	719.253	958.508	980.639	650.005	853.123	986.971	1000.41	901.949	771.617	924.307	1029.2
FBgn0038130	953.046	677.858	764.239	693.289	843.12	765.823	659.383	711.683	642.246	756.291	596.295	606.348	1000.99	993.27	705.956	744.697
FBgn0038131	0	0	2.14073	0	0	0.862413	0	1.10682	0	0	0	0	0	0.83328	0	0
FBgn0038132	2.29373	3.0127	4.28145	2.33824	1.77686	6.03689	1.09169	0	3.4483	3.33903	3.62857	1.27117	2.2681	3.33312	0	1.99651
FBgn0038133	0	1.00423	1.07036	1.16912	1.77686	0	1.09169	2.21363	0	0.834759	1.20952	3.81351	0	1.66656	2.67915	0.998253
FBgn0038134	1.14687	0	1.07036	0	6.21901	3.44965	5.45847	1.10682	2.58623	8.34759	8.46666	6.35585	2.2681	3.33312	5.3583	4.99126
FBgn0038135	2796.06	1509.36	3115.83	3144.94	1791.96	1880.06	2828.58	3051.49	1155.18	1749.65	2954.87	2912.25	2651.41	2073.2	4087.04	3069.63
FBgn0038136	1364.77	681.875	1857.08	1781.74	804.918	777.897	1549.11	1785.29	664.66	756.291	1854.2	1785.99	1400.93	983.271	2089.74	1717.99
FBgn0052473	4487.69	3091.03	6242.35	6522.53	3562.61	3900.69	5961.74	6833.48	4060.38	3976.79	6290.73	6972.37	4628.44	3135.63	6466.13	6162.21
FBgn0262844	6.8812	8.03387	1.07036	3.50737	11.5496	6.03689	3.27508	2.21363	6.03453	5.84331	2.41905	7.62702	9.07241	6.66624	4.01873	0.998253
FBgn0264991	36.6997	17.072	0	0	31.0951	61.2313	4.36678	30.9909	51.7245	5.84331	9.67619	7.62702	25.7052	46.6637	21.4332	33.9406
FBgn0266455	5103.56	7887.25	3785.87	4013.6	5344.8	4980.44	4145.16	3269.53	5394.87	5823.28	4938.48	3645.72	4834.08	5803.8	5876.72	3484.9
FBgn0038139	26.3779	11.0466	21.4073	19.8751	21.3223	9.48654	14.192	7.74771	27.5864	10.0171	19.3524	12.7117	21.925	24.1651	12.0562	20.9633
FBgn0038140	17.203	8.03387	8.5629	4.67649	6.21901	11.2114	16.3754	11.0682	5.17245	5.00855	10.8857	7.62702	14.3647	11.6659	14.7353	7.98602
FBgn0045442	2.29373	1.00423	0	0	0	0.862413	3.27508	0	0.862076	3.33903	3.62857	0	3.78017	3.33312	1.33958	0.998253
FBgn0086371	1089.52	1656.99	924.793	897.886	1183.39	1108.2	922.482	900.948	1309.49	1312.24	955.524	982.614	895.901	1190.76	922.967	900.424
FBgn0027610	2950.89	2573.85	2506.79	2670.27	2365	2528.6	2467.23	2834.56	2074.15	2342.33	2439.61	2464.8	2851.01	2848.15	2976.54	2903.92
FBgn0038142	112.393	135.572	78.1365	68.9782	116.384	83.6541	58.9515	55.3408	81.0351	101.006	70.1524	34.3216	76.3595	89.9943	69.6579	48.9144
FBgn0023495	20.6436	10.0423	17.1258	11.6912	0.88843	15.5234	42.5761	37.6317	5.17245	18.3647	16.9333	16.5252	6.80431	11.6659	4.01873	25.9546
FBgn0259831	18.3499	41.1736	8.5629	8.18385	30.2066	18.1107	5.45847	8.85453	14.6553	25.8775	19.3524	5.08468	18.1448	24.1651	18.7541	10.9808
FBgn0038143	1571.21	1072.52	1393.61	1381.9	1262.46	1271.2	1401.74	1283.91	1069.84	1177.01	1519.16	1216.51	1527.19	1336.58	1640.98	1276.77
FBgn0264987	27.5248	33.1397	47.096	26.8898	73.7397	70.7179	24.0173	14.3886	72.4144	112.692	77.4095	58.4738	179.936	99.1603	37.5081	38.9319
FBgn0038144	14.9093	12.0508	9.63326	10.5221	13.3265	8.62413	4.36678	5.53408	6.89661	3.33903	12.0952	15.254	13.6086	11.6659	6.69788	2.99476
FBgn0044511	427.781	914.857	284.716	280.589	557.934	532.971	298.033	252.354	678.454	601.026	275.771	277.115	353.824	577.463	294.707	267.532
FBgn0038145	7481.01	8652.48	7263.48	7302.34	8748.37	9027.74	7416.97	7492.04	9599.21	9311.73	7080.55	7675.32	7499.1	7790.34	6863.98	7322.18
FBgn0038146	841.8	622.625	1173.12	1300.06	665.434	720.977	1169.2	1370.24	699.143	680.328	1302.66	1389.39	850.539	509.134	1201.6	1019.22
FBgn0038147	1593	2820.89	1057.52	1380.73	3280.97	2381.12	1390.82	1717.78	1322.42	1850.66	723.295	1049.99	1527.19	4537.21	697.919	2495.63
FBgn0040553	0	0	1.07036	2.33824	0.88843	0	0	0	3.4483	0	1.20952	2.54234	0	2.49984	0	2.99476
FBgn0038148	6.8812	9.0381	1.07036	9.35298	9.77273	4.31207	4.36678	7.74771	5.17245	7.51283	2.41905	5.08468	6.80431	10.8326	0	5.98952
FBgn0038149	3096.54	5508.22	3114.76	3040.89	4326.66	4312.93	3413.73	3221.94	5455.22	4475.14	3041.95	3207.16	3010.53	4040.58	3039.5	3461.94
FBgn0053977	169.736	341.439	86.6994	51.4414	231.88	200.08	91.7023	87.4385	247.416	200.342	99.1809	73.7279	118.697	180.822	72.3371	77.8637
FBgn0038150	1.14687	0	0	0	0	0.862413	1.09169	1.10682	1.72415	0	0	0	0	0	0	0
FBgn0038151	0	0	2.14073	0	0	0.862413	1.09169	0	0.862076	3.33903	0	1.27117	3.02414	0.83328	0	0
FBgn0041711	695.001	668.82	670.047	604.436	657.439	586.441	502.179	622.031	420.693	508.368	528.562	550.417	601.047	811.615	517.076	709.758
FBgn0038153	1.14687	0	0	2.33824	0.88843	2.58724	4.36678	0	0.862076	0	0	1.27117	0	0.83328	0	1.99651
FBgn0267151	0	0	0	0	0	0	0	0	1.72415	0	0	0	0	0	0	0
FBgn0000046	17395.7	14092.4	14923	16284.7	14008.8	14148.7	13474.8	14781.5	13127.7	15383.8	15148.1	16080.3	19851.2	18361.3	16673.7	17182.9
FBgn0004049	1208.8	834.518	1458.9	1370.21	1019.03	1030.58	1514.18	1347	1156.91	1049.29	1447.8	1519.05	1193.78	900.776	1316.8	1445.47
FBgn0261814	0	0	0	0	0	0	0	0	0	0	0	0	0	0	0	0
FBgn0267239	0	0	1.07036	2.33824	0	0	0	0	0	0	0	0	0	0	1.33958	0.998253
FBgn0038156	247.723	132.559	198.017	199.92	220.331	203.529	209.605	180.411	141.38	181.977	194.733	169.066	231.347	208.32	222.37	185.675
FBgn0040554	16.0561	21.0889	7.49254	7.01473	13.3265	13.7986	6.55017	4.42726	10.3449	14.1909	7.25714	3.81351	17.3888	23.3318	12.0562	9.98253
FBgn0262323	0	0	0	0	0	0	0	0	0	0	0	0	0	0	0	0
FBgn0267574	1.14687	0	1.07036	0	0.88843	0	0	0	0.862076	2.50428	0	0	0	4.99968	1.33958	0
FBgn0267149	0	0	0	0	0	0	0	0	0	0	0	0	0	0	0	0
FBgn0038157	0	0	0	0	0	0	0	0	0	0	0	0	0	0	0	0
FBgn0261846	0	0	0	0	0	0	0	0	0	0	0	0	0	0	0	0
FBgn0051337	2.29373	2.00847	2.14073	4.67649	5.33058	1.72483	1.09169	2.21363	2.58623	1.66952	1.20952	2.54234	4.53621	5.83296	0	2.99476
FBgn0264430	0	0	0	0	0	0	0	0	0	0	0	0	0	0	0	0
FBgn0038158	0	0	0	0	0	0	0	0	0	0	0	1.27117	0	0	0	0
FBgn0038159	0	0	0	0	0	0	0	1.10682	0	0	0	0	0	0	0	0
FBgn0038160	0	1.00423	0	0	2.66529	4.31207	1.09169	2.21363	0.862076	1.66952	0	0	2.2681	0	2.67915	1.99651
FBgn0003060	0	0	1.07036	0	1.77686	0	1.09169	0	0	0	0	0	0.756034	1.66656	0	0
FBgn0038161	0	0	0	0	0	0	0	0	0	0	0	0	0	0	0	0
FBgn0267240	1.14687	2.00847	0	0	0	0.862413	0	1.10682	0	0	0	0	0	0	0	0
FBgn0267154	0	0	0	0	0	0	0	0	0	0	0	0	0	0	0	0
FBgn0038163	1.14687	0	4.28145	2.33824	0.88843	0.862413	2.18339	3.32045	0.862076	0	0	0	0	1.66656	0	0
FBgn0263396	11187.7	8421.5	10640.5	10628.5	9237.01	10150.6	10466.1	10727.3	10088.9	9639.79	11362.3	11454.5	9605.42	7040.38	8696.52	9210.88
FBgn0015778	9892.87	8265.85	10910.2	10933.6	9387.16	10489.5	10688.8	10997.3	11907.9	11466.2	11009.1	11872.7	9045.2	7617.01	9101.08	9685.05
FBgn0010258	11.4687	10.0423	9.63326	8.18385	9.77273	7.76172	5.45847	8.85453	10.3449	9.18234	10.8857	2.54234	12.8526	5.83296	6.69788	9.98253
FBgn0004237	3575.93	3590.14	4199.03	4121.15	3639.01	3955.03	4075.3	4239.11	4246.59	4093.66	3791.86	4281.3	3476.25	2940.65	3174.79	3826.3
FBgn0004587	4617.29	4865.51	4615.4	4662.46	5192.88	5236.57	4430.1	4450.51	5236.25	5668.01	4530.88	4587.65	4583.84	4119.74	4533.12	3851.26
FBgn0038165	186.939	137.58	157.343	162.508	154.587	177.657	184.496	144.993	116.38	149.422	170.543	152.54	215.47	162.49	182.182	152.733
FBgn0038166	550.496	870.671	468.819	493.369	694.753	666.645	493.446	584.399	740.523	783.004	460.828	465.248	518.64	693.289	513.057	478.163
FBgn0038167	790.191	748.154	873.416	904.9	809.36	813.256	873.356	868.851	859.49	892.357	815.219	887.277	809.713	754.952	869.384	929.373
FBgn0038168	696.148	681.875	933.356	913.084	689.422	641.635	948.682	936.366	775.006	752.952	1055.91	1006.77	697.82	482.469	1024.78	957.324
FBgn0024555	1679.01	875.692	2013.35	2074.02	1172.73	1203.07	2106.97	2074.17	1206.91	1283.02	2150.53	2199.12	1569.53	923.274	1845.93	1959.57
FBgn0038170	49.3153	80.3387	56.7292	49.1031	59.5248	68.993	55.6764	46.4863	49.1383	60.9374	70.1524	48.3045	63.5069	76.6618	58.9413	52.9074
FBgn0028487	790.191	628.65	761.028	682.767	644.112	684.756	736.894	671.837	731.04	721.231	879.324	701.686	821.809	676.624	878.761	671.824
FBgn0002937	261.486	241.016	220.495	246.685	235.434	199.217	207.422	212.509	235.347	232.898	221.343	265.675	288.049	309.147	210.313	237.584
FBgn0038172	859.003	936.95	823.109	721.348	842.232	938.305	775.103	734.926	987.077	842.271	827.314	797.024	1066.01	942.44	834.555	701.772
FBgn0038173	121.568	103.436	74.9254	118.081	102.169	120.738	103.711	89.6521	96.5525	131.892	113.695	101.694	130.794	151.657	135.297	102.82
FBgn0051469	173.177	245.033	114.529	90.0224	179.463	156.097	89.5189	101.827	143.967	146.918	104.019	119.49	161.791	194.988	115.203	106.813
FBgn0040077	0	0	0	0	0	0	0	0	0	0	0	0	0	0	0	0
FBgn0040076	0	0	0	0	0	0	0	0	0	0	0	0	0	0	0	0
FBgn0054044	4.58747	11.0466	2.14073	4.67649	5.33058	0	6.55017	3.32045	2.58623	4.17379	6.04762	2.54234	8.31638	9.16608	6.69788	5.98952
FBgn0085412	1458.81	652.752	1327.25	1222.9	1025.25	1102.16	1294.75	1340.35	963.801	1005.88	1359.5	1388.12	1317.01	1081.6	1449.42	1261.79
FBgn0267383	0	0	0	0	0	0	0	0	0	0	0	0	0	0	0	0
FBgn0038179	324.563	242.02	267.591	242.008	211.446	225.952	230.348	304.374	183.622	184.482	229.809	249.149	291.829	269.15	269.255	311.455
FBgn0038180	205.289	191.809	148.78	161.339	264.752	255.274	189.955	214.722	238.795	181.143	139.095	179.235	260.832	286.648	107.166	166.708
FBgn0038181	19609.1	11269.5	16409.7	17363.8	13096.4	15123.3	14912.5	16459.5	15138.9	14984.8	17708.6	18520.9	20089.3	19042.1	18735.3	20739.7
FBgn0260464	0	0	0	0	0	0	0	0	0	0	0	0	0	0	0	0
FBgn0259721	0	0	0	0	0	0	0	0	0	0	0	0	0	0	0	0
FBgn0038183	769.548	994.191	542.674	584.561	815.579	782.209	474.887	562.263	825.869	834.759	591.457	615.246	560.978	580.796	434.022	418.268
FBgn0000454	3301.83	5368.63	5268.32	5485.52	4650.04	3773.92	5222.67	5019.41	5837.98	4416.71	5125.96	4741.46	4128.7	3506.44	4910.88	4912.4
FBgn0267150	0	0	0	2.33824	0	2.58724	0	0	0.862076	0.834759	1.20952	1.27117	0	0	0	0
FBgn0051588	0	0	0	0	0	0	0	0	0	0	0	0	0	0	0	0
FBgn0051331	0	0	0	0	0	0	0	0	0	0	0	0	0	0	0	0
FBgn0259731	0	0	0	0	0	0	0	0	0	0	0	0	0	0	0	0
FBgn0259730	0	0	0	0	0	0	0	0	0	0	0	0	0	0	0	0
FBgn0259733	0	0	0	0	0	0	0	0	0	0	0	0	0	0	0	0
FBgn0259732	0	0	0	0	0	0	0	0	0	0	0	0	0	0	0	0
FBgn0263650	22.9373	65.2752	23.548	18.706	29.3182	15.5234	9.82525	8.85453	31.8968	22.5385	7.25714	11.4405	17.3888	29.1648	10.7166	10.9808
FBgn0263651	0	0	0	0	0	0	0	0	0	0	0	0	0	0	0	0
FBgn0002862	3.4406	5.02117	2.14073	0	4.44215	1.72483	1.09169	2.21363	3.4483	3.33903	1.20952	1.27117	3.02414	4.99968	1.33958	3.99301
FBgn0262992	3.4406	3.0127	3.21109	0	4.44215	1.72483	1.09169	1.10682	0.862076	0.834759	1.20952	0	1.51207	0.83328	0	0.998253
FBgn0266464	934.696	802.383	1176.33	1282.53	800.476	785.658	1105.89	1174.33	778.454	800.534	1138.16	1184.73	997.965	786.617	1130.6	1195.91
FBgn0051495	131.89	142.601	133.795	137.956	152.81	137.124	162.662	170.45	157.76	150.257	134.257	148.727	118.697	124.159	133.958	150.736
FBgn0038186	0	0	0	0	0	0	0	0	0	0	0	0	0	0	0	0
FBgn0008646	45.8747	47.199	37.4627	39.7501	53.3058	44.8455	27.2924	19.9227	32.7589	49.2508	37.4952	24.1522	58.9707	55.8298	33.4894	29.9476
FBgn0000576	20.6436	16.0677	24.6183	28.0589	23.9876	27.5972	19.6505	17.7091	6.89661	18.3647	15.7238	16.5252	27.9733	24.9984	30.8102	22.9598
FBgn0038188	0	0	0	0	0.88843	0	0	0	0	0	0	0	0	0	0	0
FBgn0038189	0	1.00423	0	0	4.44215	0	0	0	0	0	0	0	0	0	0	0
FBgn0047199	269.514	396.672	215.143	164.846	368.699	347.552	217.247	188.159	500.866	409.032	175.381	228.811	124.746	229.152	186.201	180.684
FBgn0038190	282.129	546.303	267.591	238.501	390.021	363.938	266.373	228.004	529.315	434.074	273.352	251.692	210.934	282.482	217.011	208.635
FBgn0016672	1173.24	1679.08	1299.42	1415.81	1301.55	1266.88	1319.86	1386.84	1415.53	1424.1	1260.32	1259.73	1289.04	1344.91	1466.84	1362.62
FBgn0038191	1005.8	820.459	1166.7	1407.62	838.678	918.47	1131	1299.4	975.008	853.958	1257.9	1559.73	903.461	504.135	1083.72	953.331
FBgn0015270	185.792	232.982	308.264	339.045	250.537	251.825	473.795	355.288	312.071	232.898	378.581	311.437	210.934	209.153	259.878	399.301
FBgn0264493	6842.21	8612.31	7279.54	6827.67	8592.01	8838.01	8379.85	7225.3	11885.4	9420.25	8111.06	8046.51	6639.49	7019.55	6466.13	7704.52
FBgn0263414	38.9935	55.2328	27.8294	25.7207	52.4174	55.1944	28.3841	25.4568	74.1385	49.2508	15.7238	21.6099	35.5336	36.6643	6.69788	29.9476
FBgn0038194	3745.67	3980.78	3552.53	3514.38	3223.23	3046.91	3134.25	3039.32	3587.96	3162.07	3955.14	3938.08	4094.68	4463.05	3795.02	4987.27
FBgn0038195	1533.36	1161.9	1509.21	1436.85	1505.89	1501.46	1501.08	1555.08	1404.32	1333.94	1355.88	1395.74	1544.58	1299.08	1375.74	1484.4
FBgn0038196	924.375	2093.83	628.303	662.892	1425.04	1304.83	665.934	630.885	1691.39	1357.32	576.943	666.093	637.337	1125.76	594.771	583.978
FBgn0011971	0	0	0	0	0	0	0	0	0	0	0	0	0	0.83328	0	0
FBgn0038197	1919.85	1569.62	1553.1	1561.95	1544.98	1624.79	1456.32	1330.39	1629.32	1671.19	1732.04	1487.27	1856.82	1638.23	1549.89	1384.58
FBgn0038198	1115.9	1465.18	880.908	855.797	1206.49	1147.87	863.53	801.335	1046.56	1035.94	833.362	757.617	1039.55	1460.74	806.424	880.459
FBgn0038199	34.406	34.1439	47.096	18.706	63.0786	73.3051	24.0173	44.2726	43.9659	38.3989	30.2381	36.8639	40.8259	35.831	18.7541	21.9616
FBgn0038200	10.3218	10.0423	2.14073	7.01473	13.3265	6.03689	2.18339	6.6409	7.75868	4.17379	16.9333	6.35585	6.80431	15.8323	5.3583	4.99126
FBgn0038201	152.533	75.3175	78.1365	90.0224	96.8389	90.5534	75.3269	68.6226	81.8972	59.2679	71.3619	69.9144	83.1638	95.8272	85.7328	69.8777
FBgn0038202	79.1338	48.2032	58.8699	43.2575	51.529	53.4696	60.0432	60.8749	68.9661	55.9288	59.2667	40.6774	70.3112	53.3299	56.2622	51.9091
FBgn0265168	1.14687	0	0	0	0	0	0	1.10682	0	0.834759	0	0	0	0.83328	0	0
FBgn0038203	0	3.0127	2.14073	2.33824	1.77686	0.862413	3.27508	0	1.72415	1.66952	0	2.54234	4.53621	0	2.67915	1.99651
FBgn0038204	0	0	0	0	0	0	0	0	0	0	1.20952	0	0	0	0	0
FBgn0038205	24.0842	16.0677	22.4776	10.5221	13.3265	19.8355	21.8339	15.4954	10.3449	16.6952	33.8667	21.6099	24.1931	29.1648	13.3958	21.9616
FBgn0020510	899.143	762.213	968.678	1025.32	833.348	901.222	1060.04	1064.76	890.524	934.93	1076.48	1076.68	937.483	829.947	1016.74	1064.14
FBgn0038206	510.356	787.319	545.885	653.539	638.781	657.159	575.323	577.758	728.454	730.414	558.8	547.874	609.364	619.127	569.32	626.903
FBgn0010340	248.87	338.427	293.279	312.156	274.525	295.808	301.308	277.811	299.14	261.279	315.686	321.606	239.663	278.316	234.426	281.507
FBgn0262955	1399.18	929.92	2280.94	2300.83	1163.84	1257.4	2436.66	2467.09	1037.08	1055.97	2247.29	2682.17	1513.58	826.614	1985.25	2186.17
FBgn0038207	81.4275	120.508	56.7292	59.6252	117.273	118.151	58.9515	57.5544	121.553	70.9545	64.1047	39.4063	77.8715	126.659	60.2809	63.8882
FBgn0038208	0	0	0	0	1.77686	0.862413	0	0	0	0	2.41905	3.81351	1.51207	0.83328	0	0.998253
FBgn0260226	0	2.00847	0	0	0	0	0	3.32045	1.72415	2.50428	1.20952	0	0	0.83328	2.67915	1.99651
FBgn0038209	0	0	0	0	0	0	0	0	0	0	0	0	0	0	0	0
FBgn0265146	0	0	0	0	0	0	0	0	0	0	0	0	0	0	0	0
FBgn0051533	0	0	0	0	0	0	0	0	0	0	0	0	0	0	0	0
FBgn0051327	0	0	0	0	0	0	0	0	0	0	0	0	0	0	0	0
FBgn0038210	0	0	0	0	0	0	0	0	0	0	0	0	0	0	0	0
FBgn0011582	125.008	36.1524	115.599	132.111	58.6364	62.0937	120.086	138.352	41.3796	70.9545	128.209	110.592	103.577	89.161	136.637	114.799
FBgn0038211	1185.86	969.085	833.812	737.716	875.992	804.631	663.75	722.751	793.972	790.516	665.238	672.449	1093.23	936.607	663.09	726.728
FBgn0051326	1146.87	621.621	1252.32	1201.86	606.798	695.105	1054.58	1325.97	625.867	685.337	968.828	1121.17	1610.35	885.777	1197.58	1187.92
FBgn0053109	2097.62	2450.33	1294.07	1452.05	1962.54	1897.31	1253.27	1100.18	765.523	1013.4	589.038	392.792	1252.75	1709.06	1006.02	732.718
FBgn0053329	301.626	216.914	179.821	163.677	183.905	194.905	159.387	221.363	138.794	205.351	140.305	133.473	280.489	169.156	175.484	128.775
FBgn0027563	559.671	494.083	378.908	388.148	385.579	331.167	374.451	423.911	337.072	422.388	320.524	380.08	546.613	411.64	337.573	418.268
FBgn0038213	1.14687	0	0	1.16912	0.88843	0	0	2.21363	1.72415	2.50428	4.83809	2.54234	15.1207	2.49984	1.33958	1.99651
FBgn0262983	61.9308	77.326	19.2665	28.0589	13.3265	9.48654	13.1003	17.7091	75.8627	95.9972	61.6857	54.6603	68.7991	80.8282	42.8664	36.9354
FBgn0038214	145.652	212.898	84.5586	107.559	103.058	89.691	63.3183	69.7294	97.4146	159.439	66.5238	87.7107	160.279	154.157	54.9226	82.855
FBgn0027083	289.01	327.38	310.405	356.582	319.835	315.643	351.526	332.045	304.313	318.043	321.733	344.487	231.347	293.315	296.046	327.427
FBgn0262808	17.203	15.0635	2.14073	8.18385	6.21901	6.8993	5.45847	16.6022	7.75868	7.51283	1.20952	1.27117	46.8741	2.49984	5.3583	4.99126
FBgn0038217	1.14687	0	0	0	0	0	0	0	0	0	0	0	0	0	0	0
FBgn0038218	0	0	0	0	0	0	0	0	0	0	0	0	0	0	0	0
FBgn0038219	0	0	0	0	0	0	0	0	1.72415	0	0	0	0	0	0	0
FBgn0003862	1755.85	630.659	2904.96	3052.58	974.608	1051.28	2894.08	2979.55	1182.77	1145.29	3311.68	3630.46	1916.55	879.111	2616.19	2837.03
FBgn0267684	0	0	0	0	0	0	0	0	0	0	0	0	0	0	0	0
FBgn0267156	9.17493	24.1016	14.9851	10.5221	19.5455	25.01	14.192	4.42726	25.8623	15.8604	13.3048	7.62702	11.3405	7.49952	6.69788	9.98253
FBgn0038220	1861.36	1906.04	1801.42	1886.96	1899.46	2027.53	1858.06	1894.87	1817.26	1848.16	1882.02	1735.15	1851.53	1644.9	1776.28	1779.88
FBgn0038221	16.0561	14.0593	29.9702	28.0589	21.3223	20.6979	26.2007	19.9227	18.9657	15.8604	15.7238	10.1694	18.9009	17.4989	22.7728	17.9686
FBgn0003567	974.837	935.946	1082.14	1082.61	1001.26	919.332	1229.25	1082.47	1063.8	1113.57	1253.07	1239.39	1019.13	840.78	1087.74	1170.95
FBgn0004855	553.937	947.997	391.753	451.281	716.963	727.877	413.752	394.027	795.696	753.787	390.676	433.469	479.326	629.127	407.231	394.31
FBgn0051321	392.228	421.778	372.486	418.546	472.645	380.324	326.417	274.49	421.555	440.753	376.162	371.182	476.302	535.799	417.948	389.319
FBgn0013767	36.6997	40.1693	23.548	32.7354	29.3182	28.4596	22.9256	15.4954	37.9313	37.5641	25.4	24.1522	35.5336	32.4979	24.1124	21.9616
FBgn0011474	803.954	652.752	1233.06	1150.42	847.563	921.057	1439.94	1179.87	930.18	703.702	1219.2	1169.48	796.86	634.126	1044.87	1212.88
FBgn0038223	783.31	456.926	1139.94	1080.27	596.137	627.837	1153.92	1132.27	612.936	515.881	1191.38	1253.37	738.646	478.303	961.815	1083.1
FBgn0038224	6767.66	7332.91	6955.22	7436.78	5984.47	6289.58	6292.53	6635.36	6625.05	6556.19	7139.82	7455.41	7220.88	7244.54	8119.17	8041.92
FBgn0003480	96.3368	185.783	116.67	115.743	123.492	119.875	137.554	139.459	192.243	124.379	141.514	149.998	99.0405	120.826	141.995	159.72
FBgn0024321	346.354	222.94	314.687	274.744	277.19	315.643	265.282	265.636	283.623	265.453	321.733	292.369	373.481	279.982	292.027	242.575
FBgn0051320	79.1338	75.3175	135.936	108.728	75.5166	75.0299	150.654	121.75	76.7247	76.7978	100.39	120.761	84.6758	39.1642	99.1286	97.8288
FBgn0086058	0	0	0	0	0	0	0	0	0	0.834759	0	0	0	0	1.33958	0
FBgn0266248	0	0	0	1.16912	0	0	0	0	0.862076	0	0	0	0	0	0	0
FBgn0038225	1.14687	0	0	0	0.88843	0	0	1.10682	0.862076	0	0	0	0	0.83328	0	0.998253
FBgn0086901	1262.7	565.384	1289.79	1220.56	844.897	796.87	1123.35	1232.99	775.006	830.585	1346.2	1177.1	1471.24	964.105	1251.16	1152.98
FBgn0262327	0	0	0	0	0	0	0	0	0	0	0	0	0	1.66656	0	0
FBgn0085417	34.406	31.1312	24.6183	17.5368	23.0992	18.9731	10.9169	27.6704	21.5519	25.0428	25.4	24.1522	28.7293	28.3315	20.0936	24.9563
FBgn0265065	0	0	0	0	0	0	0	0	0	0	1.20952	0	0	0	1.33958	0.998253
FBgn0265066	3.4406	7.02964	0	3.50737	7.99587	7.76172	2.18339	1.10682	8.62076	2.50428	2.41905	3.81351	2.2681	3.33312	0	3.99301
FBgn0038233	339.473	258.088	382.119	419.715	293.182	323.405	415.936	448.261	280.175	274.636	388.257	387.707	314.51	250.817	365.704	395.308
FBgn0038234	254.604	358.511	234.409	240.839	273.637	303.569	258.732	255.675	266.381	252.932	256.419	244.065	214.714	234.152	208.974	215.623
FBgn0038235	219.052	320.351	149.851	141.464	243.43	275.972	152.837	159.382	281.899	267.958	174.171	184.32	158.011	205.82	147.353	150.736
FBgn0038237	540.174	250.054	567.292	598.59	327.831	401.022	489.079	556.729	386.21	397.345	723.295	573.298	594.999	425.806	592.092	550.037
FBgn0085302	1.14687	0	0	1.16912	1.77686	0.862413	0	0	0	0.834759	1.20952	0	0	0	0	0
FBgn0038236	2032.25	1672.05	1329.39	911.915	1954.55	1660.15	1066.59	816.83	1121.56	1168.66	1100.67	674.991	1502.24	1681.56	1205.62	862.49
FBgn0267685	0	0	0	0	0	0	0	0	0	0.834759	0	0	0.756034	0	0	0
FBgn0267686	0	0	0	0	0	0	0	0	0	1.66952	0	0	0	0	0	0
FBgn0267687	0	0	0	0	0	0	2.18339	0	0	0	0	1.27117	0	0	0	0
FBgn0038238	57.3433	76.3218	37.4627	37.4119	60.4133	37.0838	20.7422	29.884	39.6555	53.4246	24.1905	30.5081	51.4103	63.3293	14.7353	35.9371
FBgn0038239	0	0	0	0	0	0	0	1.10682	0	0	0	0	0	0.83328	0	0
FBgn0038240	0	0	0	0	0	0.862413	0	0	0	0	0	0	0	0	0	0
FBgn0038241	1.14687	0	0	0	0	0	0	0	0	0	0	0	0	0	0	0
FBgn0038242	0	0	0	0	0	0.862413	0	0	0	0	0	0	0	0	0	0
FBgn0051313	2000.14	4367.41	1439.64	1737.32	2485.83	2113.77	1179.03	1721.1	2400.88	2458.36	1065.59	1591.5	2201.57	4180.57	1583.38	2153.23
FBgn0038243	377.319	582.456	299.702	263.052	437.996	438.106	219.431	268.956	491.383	570.975	264.886	263.132	505.787	487.469	308.102	257.549
FBgn0264904	27.5248	46.1947	28.8998	21.0442	50.6405	37.9462	27.2924	33.2045	50.8625	50.9203	27.819	33.0504	35.5336	33.3312	17.4145	22.9598
FBgn0004629	5100.12	7168.22	4785.59	6264.16	6733.41	5284	5203.02	8750.49	2555.19	2985.93	2918.58	4058.85	7022.05	8031.99	6156.69	7935.11
FBgn0038244	1742.09	1134.78	2252.04	2132.48	1539.65	1744.66	2181.21	2183.75	1518.98	1440.79	2339.22	2427.93	1776.68	1177.42	2233.07	1941.6
FBgn0264903	0	0	0	0	0	0	0	0	0.862076	0	0	0	0	0	0	0
FBgn0020299	945.018	497.096	886.26	882.687	557.046	571.78	748.902	692.867	579.315	606.035	823.686	828.803	895.145	656.625	916.27	805.59
FBgn0038246	184.646	147.622	137.006	127.434	171.467	150.922	144.104	86.3317	151.725	153.596	165.705	122.032	176.156	184.155	124.581	108.81
FBgn0003169	1361.33	1114.7	1269.45	1213.55	1144.3	1150.46	1269.64	1355.85	1118.97	1130.26	1232.5	1339.81	1246.7	1043.27	1085.06	1128.03
FBgn0013981	5090.94	11063.6	4010.65	4053.35	6239.45	6090.36	3930.1	3742.15	8880.24	7878.45	4288.97	4380.45	5371.62	6649.58	4782.28	3794.36
FBgn0038248	2.29373	1.00423	5.35181	4.67649	14.2149	2.58724	2.18339	3.32045	3.4483	5.00855	4.83809	5.08468	3.02414	1.66656	1.33958	2.99476
FBgn0038247	150.24	101.428	248.324	213.949	125.269	159.546	235.806	249.034	171.553	141.074	224.971	287.284	154.231	125.825	190.22	253.556
FBgn0086686	1164.07	637.688	1533.83	1503.49	821.798	999.537	1610.25	1519.66	1011.21	907.383	1579.64	1671.59	1215.7	779.95	1450.76	1301.72
FBgn0038250	324.563	253.067	272.942	253.699	225.661	206.117	230.348	338.686	199.14	211.194	204.409	268.217	387.846	275.816	308.102	245.57
FBgn0038251	509.209	1109.68	472.03	450.112	840.455	817.568	525.105	464.863	1068.11	875.662	504.371	434.74	511.835	742.453	404.552	460.195
FBgn0025808	202.995	263.109	250.465	213.949	233.657	219.915	280.565	245.713	325.003	251.262	276.981	264.403	181.448	237.485	222.37	230.596
FBgn0038252	2093.03	4829.36	2054.03	1996.86	3404.47	3321.15	2287.1	2009.98	5274.18	3810.67	2313.82	2330.05	1774.41	2805.65	1768.24	2223.11
FBgn0265140	1450.79	813.429	1748.97	1857.73	975.497	1041.79	1675.75	1868.31	1054.32	1111.06	1688.49	1853.37	1589.18	1039.93	1620.89	1679.06
FBgn0262127	854.416	422.782	1154.92	1224.07	628.12	633.011	1231.43	1208.64	637.936	675.32	1358.29	1199.98	949.579	544.132	1110.51	1145.99
FBgn0038256	2111.38	1828.71	2338.74	2247.05	1687.13	1727.41	2245.62	2202.56	1761.22	1825.62	2242.46	2483.87	2026.17	1686.56	2097.78	2301.97
FBgn0011217	9845.85	11177.1	7923.89	8093.83	11374.6	11539.9	8658.23	7986.79	13169.1	11705.8	8206.62	8440.57	8835.02	10876.8	7300.69	8197.65
FBgn0263929	1610.2	974.107	2087.21	2167.55	1283.78	1397.97	2295.83	2302.18	1460.36	1421.59	2177.14	2190.23	1701.08	1260.75	2009.36	2026.45
FBgn0038257	1127.37	2574.86	1336.88	1113	1704.9	1747.25	1543.66	1835.1	1444.84	1183.69	621.695	1499.98	1085.67	2504.01	609.507	2615.42
FBgn0038258	3.4406	4.01693	4.28145	3.50737	2.66529	0.862413	2.18339	1.10682	0.862076	0.834759	1.20952	1.27117	0	0.83328	2.67915	1.99651
FBgn0038260	73.3995	63.2667	71.7143	71.3164	58.6364	59.5065	65.5017	68.6226	56.897	60.9374	61.6857	64.8297	68.7991	72.4954	73.6766	52.9074
FBgn0038261	55.0496	58.2456	34.2516	42.0884	48.8637	37.0838	32.7508	44.2726	29.3106	50.0855	14.5143	41.9486	70.3112	69.9955	64.2996	33.9406
FBgn0038262	172.03	102.432	133.795	142.633	143.926	123.325	122.27	166.022	106.897	129.388	149.981	141.1	167.084	169.156	143.335	147.741
FBgn0266756	2518.52	1169.93	3030.2	3284.06	1719.11	1720.51	2849.32	3167.71	1497.43	1661.17	2965.75	3044.45	2649.14	1904.05	3212.3	3072.62
FBgn0267688	0	0	0	0	0	0	0	0	0	0	0	0	0	0	0	0
FBgn0038266	0	0	0	1.16912	0.88843	0	0	0	0	0	0	0	0	0	0	0
FBgn0038268	368.144	313.321	310.405	313.325	307.397	419.133	314.408	328.724	343.106	353.938	354.39	368.639	384.821	388.309	314.8	356.376
FBgn0038269	691.561	334.41	916.23	952.834	500.186	535.559	883.181	970.678	486.211	487.499	944.638	1019.48	584.415	382.476	853.31	834.539
FBgn0067628	119.274	159.673	149.851	141.464	130.599	137.124	102.619	130.604	166.381	128.553	156.029	171.608	109.625	132.492	120.562	134.764
FBgn0067629	266.073	368.554	147.71	156.662	324.277	317.368	199.78	193.693	332.761	251.262	176.59	170.337	166.328	257.484	150.032	211.63
FBgn0004597	279.835	358.511	351.079	313.325	390.021	346.69	382.093	323.19	381.9	304.687	343.505	349.572	297.878	339.978	314.8	333.416
FBgn0038271	13783	13004.8	14718.6	16110.5	14497.4	13698.6	14880.9	16771.6	14152.7	15170.1	16790.6	18255.3	17872.7	15700.7	21075.5	19371.1
FBgn0038272	518.384	621.621	616.529	609.113	516.178	527.797	505.455	595.467	558.625	557.619	498.324	524.993	461.181	524.967	498.322	557.025
FBgn0038273	72.2526	69.2921	71.7143	63.1326	55.0827	85.3789	76.4186	71.9431	113.794	84.3106	67.7333	77.5414	47.6302	61.6627	77.6954	60.8934
FBgn0038274	424.341	401.693	618.67	590.407	445.104	464.841	644.1	679.585	489.659	405.693	555.171	653.381	428.671	313.313	602.809	642.875
FBgn0038275	346.354	478.015	284.716	299.295	375.806	402.747	276.199	281.131	474.142	400.684	338.667	305.081	263.856	256.65	297.386	253.556
FBgn0262514	0	0	0	2.33824	0	0	0	0	0	0	0	0	0	0	1.33958	0
FBgn0038277	8204.68	20772.6	9582.96	10808.5	12637.9	12624.9	8773.95	10023.3	18307.9	17466.5	10215.6	11796.5	8677.76	9124.42	11004.6	8856.5
FBgn0028662	5392.57	8000.73	5239.42	5415.37	6395.81	6264.57	4778.35	4857.82	6205.22	7111.31	4985.66	4754.18	5772.32	7044.55	5666.4	4934.36
FBgn0038279	172.03	120.508	189.454	183.552	135.041	133.674	185.588	193.693	116.38	151.926	224.971	160.167	133.818	133.325	180.843	140.754
FBgn0267158	0	0	0	0	0	0	0	0	0	0	0	0	0	0	0	0
FBgn0267159	0	0	0	0	0	0	0	0	0	0	0	0	0	0	0	0
FBgn0038280	2.29373	0	0	0	0	0	0	0	0	0	0	0	0	0	0	0.998253
FBgn0038281	0	0	0	0	0	0	0	0	0	0	0	0	0	0	0	0
FBgn0266249	0	0	0	0	0	0	0	0	0	0	0	0	0	0	0	0
FBgn0038282	205.289	114.483	135.936	126.265	140.372	134.536	139.737	112.895	113.794	141.074	148.771	136.015	187.497	169.989	151.372	94.834
FBgn0038285	0	0	1.07036	0	0	3.44965	2.18339	1.10682	0	0	0	1.27117	2.2681	4.99968	0	0.998253
FBgn0038286	2165.28	1515.39	2719.79	2559.21	1811.51	1761.91	2755.44	2661.89	1756.91	1747.15	2674.26	2618.61	2206.11	1579.07	2357.65	2491.64
FBgn0261859	1224.85	698.947	1629.09	1649.63	1005.7	871.037	1493.44	1742.13	812.937	1109.39	1496.18	1480.91	1481.07	1235.75	1586.06	2146.24
FBgn0262315	0	0	0	0	0	0	0	0	0	0	1.20952	0	0	0	0	0
FBgn0038290	532.146	574.422	607.966	619.635	345.599	363.938	383.185	392.92	828.455	904.044	832.152	818.634	1042.57	1266.59	885.459	1005.24
FBgn0267160	310.801	274.156	416.371	368.273	7.10744	31.0469	100.436	37.6317	650.005	717.892	696.686	465.248	602.559	534.966	531.811	371.35
FBgn0038291	365.85	270.139	458.115	493.369	307.397	282.009	451.962	441.62	266.381	303.017	314.476	549.145	675.895	653.292	352.308	913.401
FBgn0038292	750.051	826.484	875.557	729.532	654.773	683.894	532.747	543.447	1197.42	1269.67	1020.84	1095.75	1410	1586.57	1186.86	1011.23
FBgn0266064	9546.52	7514.68	10829.9	10809.7	7668.04	7653.92	9505.38	10176.1	8244.03	8380.14	9687.07	10971.5	10604.1	10364.3	9798.99	13215.9
FBgn0038295	67.6651	46.1947	58.8699	94.6989	48.8637	64.681	91.7023	56.4476	50.0004	62.6069	94.3428	82.6261	86.944	73.3287	117.883	73.8707
FBgn0038294	34942.7	42713.1	24254.4	24800.6	35896.1	36266.2	24874.3	22259.2	32916.6	33116.5	24465	20965.4	33995.8	45956.2	28180.6	26093.3
FBgn0038296	153.68	102.432	246.183	247.854	144.814	115.563	286.024	285.559	119.829	121.875	231.019	265.675	165.572	92.4941	247.821	256.551
FBgn0263633	0	0	0	0	0	0	0	0	0	0	0	0	0	0	0	0
FBgn0260659	1607.91	1412.96	1504.93	1517.52	1341.53	1328.12	1406.1	1454.36	1581.05	1417.42	1433.29	1397.02	1320.04	1254.92	1287.33	1401.55
FBgn0028984	1551.71	1673.05	1605.54	1526.87	1342.42	1312.59	1376.63	1418.94	1871.57	1698.73	1706.64	1722.44	1686.71	1636.56	1748.15	1637.13
FBgn0038299	647.98	356.503	505.211	524.936	247.872	231.989	384.276	933.046	427.59	549.271	501.952	483.045	1775.17	482.469	739.446	715.747
FBgn0038300	290.157	294.24	257.957	275.913	373.141	351.002	325.325	266.743	325.003	348.929	299.962	292.369	282.001	260.817	304.084	334.415
FBgn0038301	329.151	327.38	377.838	404.516	195.455	198.355	280.565	230.218	620.695	613.548	514.048	505.926	496.715	429.139	535.83	424.257
FBgn0038302	239.695	251.058	160.554	149.648	254.98	270.798	216.156	179.304	180.174	197.003	175.381	151.269	149.695	222.486	175.484	231.595
FBgn0038303	760.373	591.494	852.009	899.055	632.562	637.323	851.522	835.646	673.281	647.773	887.79	935.581	684.967	632.46	858.668	808.585
FBgn0038304	480.537	416.757	525.548	606.774	479.752	460.529	620.082	588.826	481.038	469.969	549.124	559.315	505.787	419.14	589.413	610.931
FBgn0051155	315.388	736.103	321.109	296.957	477.087	476.052	306.766	257.888	568.97	504.194	303.59	296.183	277.465	439.139	304.084	283.504
FBgn0051344	426.634	525.214	430.286	478.171	437.108	409.646	412.661	462.649	451.728	449.1	388.257	414.401	455.889	482.469	396.514	559.022
FBgn0263979	1510.42	1772.47	1757.54	1729.13	1841.72	1836.08	2275.09	2043.18	2158.64	1744.65	1792.51	1880.06	1422.1	1460.74	1569.98	2033.44
FBgn0038306	959.927	1223.16	774.943	776.297	1059.01	1013.34	894.098	915.337	1190.53	1164.49	904.724	852.955	745.45	744.119	811.783	780.634
FBgn0038307	630.777	1075.53	515.915	543.642	866.22	790.833	493.446	486.999	883.628	869.818	572.105	560.586	492.934	678.29	546.547	500.125
FBgn0085345	42.4341	128.542	102.755	88.8533	78.1819	159.546	81.8771	117.323	25.0002	110.188	89.5047	143.642	52.1664	93.3274	36.1685	69.8777
FBgn0263448	1.14687	0	0	1.16912	0	0	0	0	0	0	1.20952	2.54234	0	2.49984	0	1.99651
FBgn0045035	524.118	305.287	675.399	754.084	424.67	379.462	763.094	800.228	559.487	449.1	836.99	865.667	541.321	378.309	630.94	783.628
FBgn0266599	56986.7	59673.6	63374	65307.2	65153.9	69851.1	65270.2	71806.9	64513.4	66300.7	60185.9	65742.4	57618.1	48932.7	66720.2	56827.5
FBgn0038309	64.2245	70.2964	79.2068	68.9782	49.7521	55.1944	65.5017	60.8749	53.4487	62.6069	59.2667	55.9315	66.531	96.6605	75.0162	69.8777
FBgn0259823	107.805	74.3133	96.3326	105.221	97.7273	96.5903	88.4273	95.1862	90.518	98.5015	104.019	94.0666	106.601	105.827	123.241	88.8445
FBgn0263740	3819.07	4798.23	3367.36	3468.78	4148.08	4228.41	3380.98	3691.23	4488.83	4385.82	3288.69	3522.41	3356.04	3393.12	3352.96	3189.42
FBgn0263755	159.414	142.601	178.751	174.199	162.583	169.033	179.038	182.625	202.588	211.194	185.057	219.912	154.987	134.991	174.145	158.722
FBgn0014879	2431.36	3091.03	1974.82	1766.54	2795	2861.49	1990.16	1921.43	3343.99	3029.34	1886.86	2152.09	1913.52	2163.2	1681.17	1866.73
FBgn0016691	14265.9	22034.9	14988.3	14975.3	15664.8	15483.8	13673.5	14042.2	18045	17757.8	15094.9	16141.3	16643.3	20627.9	17697.1	17122
FBgn0038311	14.9093	18.0762	10.7036	19.8751	11.5496	5.17448	9.82525	7.74771	14.6553	14.1909	27.819	17.7964	14.3647	17.4989	25.4519	9.98253
FBgn0038312	292.451	242.02	276.154	343.722	271.86	256.137	274.015	333.152	239.657	283.818	353.181	307.623	268.392	269.983	340.252	341.402
FBgn0000283	2309.79	1597.74	2949.92	2876.04	1823.95	1959.4	2992.33	2793.6	2368.98	2382.4	3028.65	3435.97	2375.46	1599.9	2596.1	2973.8
FBgn0038313	357.822	415.753	345.727	348.398	392.686	388.948	323.142	384.065	400.865	401.519	372.533	348.301	325.851	302.481	368.383	374.345
FBgn0267750	0	0	0	0	0	0	0	0	0	0	0	0	0	0	0	0
FBgn0027378	493.153	676.853	414.23	431.406	605.021	604.552	438.861	444.94	694.833	658.625	437.848	388.978	446.816	571.63	403.212	514.1
FBgn0011476	219.052	401.693	186.243	185.89	284.298	251.825	157.204	157.168	310.347	302.183	175.381	214.828	210.934	228.319	176.824	196.656
FBgn0003721	39238.9	39141	29762.5	30965.4	35722.9	35258	27684.3	28258.1	37077	39753.7	29628.5	31489.4	39902	43933.9	34080.1	32642.9
FBgn0266745	9.17493	7.02964	4.28145	3.50737	5.33058	12.0738	3.27508	3.32045	12.0691	10.0171	3.62857	6.35585	7.56034	4.99968	5.3583	7.98602
FBgn0004117	27201.4	19597.6	24395.7	25127.9	22137	23883.7	23924.5	26174	20483.8	21566.8	25333.5	27003.5	31701.3	27978.2	29180	28742.7
FBgn0038315	3.4406	15.0635	5.35181	12.8603	5.33058	6.03689	7.64186	5.53408	9.48283	12.5214	12.0952	13.9829	9.82845	9.99936	6.69788	9.98253
FBgn0038316	524.118	636.684	648.64	584.561	628.12	728.739	602.615	571.117	568.97	565.966	601.133	603.806	539.053	558.298	577.357	562.016
FBgn0264832	4.58747	2.00847	0	2.33824	1.77686	5.17448	0	2.21363	0.862076	0	0	0	0.756034	0	0	0.998253
FBgn0026441	501.181	371.566	565.151	583.392	464.649	468.29	581.873	633.099	494.832	497.516	608.39	573.298	533.004	341.645	566.64	682.805
FBgn0038318	844.094	1019.3	1116.39	1058.06	967.501	957.279	1116.8	1093.53	1083.63	1101.05	1144.21	1203.8	893.633	842.446	1068.98	1145
FBgn0000533	394.522	375.583	492.367	430.237	393.575	415.683	431.219	468.183	391.382	414.875	448.733	432.198	341.728	292.481	438.041	428.25
FBgn0038319	955.34	1539.49	805.983	813.709	1305.99	1215.14	763.094	910.91	1279.32	1217.91	746.276	865.667	956.383	1254.92	926.986	875.468
FBgn0013269	5657.49	7218.43	5020	5106.72	6807.15	7073.51	4824.2	5313.82	7495.75	6964.39	4587.72	5401.2	4617.86	4268.06	4353.62	4535.06
FBgn0038320	1838.43	1156.88	2052.96	2114.94	1377.07	1392.8	2039.29	2251.26	1639.67	1621.94	2279.95	2393.61	1951.32	1337.41	2009.36	1960.57
FBgn0038321	480.537	410.732	510.563	487.524	393.575	475.19	422.486	541.233	469.831	396.51	442.686	472.875	460.425	337.478	518.416	393.312
FBgn0021750	341.766	261.101	357.501	383.472	309.174	254.412	353.709	374.104	262.933	277.975	336.248	358.47	322.071	250.817	353.648	365.361
FBgn0019925	2960.06	2837.96	2610.61	2753.28	2949.59	2936.52	2752.16	2750.44	2635.37	2620.31	2352.52	2633.86	2627.22	2947.31	2361.67	2718.24
FBgn0051301	984.012	1086.58	1020.06	1026.49	1066.12	1134.94	1145.19	1012.74	1125.01	1052.63	1006.32	1093.21	934.458	909.109	971.192	972.298
FBgn0261679	0	0	0	0	0	0	0	0	0	0	0	0	0	0	0	0
FBgn0261680	0	0	0	0	0	0	0	0	0	0	0	0	0	0	0	0
FBgn0266722	88.3087	239.008	78.1365	79.5003	110.165	119.013	78.602	77.4771	168.967	141.909	94.3428	78.8125	89.9681	135.825	79.0349	77.8637
FBgn0038324	74.5463	85.3599	119.881	107.559	85.2893	94.8654	101.528	106.254	75.0006	78.4673	88.2952	101.694	101.309	74.9952	116.543	75.8672
FBgn0038325	761.519	791.336	799.561	782.143	756.054	754.611	730.344	841.18	810.351	791.351	780.143	869.48	718.989	699.955	746.143	760.669
FBgn0038326	1987.52	2024.53	2224.21	2185.09	1705.79	1764.5	1922.47	2149.44	1872.43	1863.18	1966.69	2072.01	1859.84	1861.55	1898.18	1965.56
FBgn0026634	493.153	387.634	502	597.421	393.575	389.811	539.297	553.408	346.554	338.077	540.657	524.993	384.065	336.645	495.643	573.995
FBgn0038327	396.816	625.638	383.19	336.707	485.971	497.612	386.46	342.006	562.073	479.986	406.4	363.555	336.435	492.469	320.159	344.397
FBgn0026737	342.913	694.93	233.339	264.222	510.847	444.143	299.124	244.606	692.247	522.559	261.257	242.793	298.634	509.134	215.672	320.439
FBgn0085433	453.012	391.651	333.953	325.016	451.323	415.683	315.5	335.365	361.21	419.884	316.895	311.437	369.701	375.809	312.121	317.444
FBgn0038330	99.7774	136.576	90.9808	90.0224	127.046	112.976	84.0605	111.788	100.001	95.1625	73.7809	92.7954	92.2362	126.659	89.7516	104.817
FBgn0038332	55.0496	95.4022	66.3625	49.1031	88.843	69.8555	63.3183	49.8067	99.1387	70.9545	50.8	78.8125	60.4827	87.4944	54.9226	57.8987
FBgn0038331	1414.09	2047.63	790.998	844.106	1662.25	1516.98	777.286	799.121	1796.57	1724.61	768.047	769.058	1248.97	1817.38	801.066	886.448
FBgn0262483	566.552	345.456	552.307	517.921	466.426	457.941	439.953	402.881	362.934	372.302	533.4	427.113	593.487	489.969	515.737	433.242
FBgn0038334	0	0	0	0	0	0	0	0	0	0	0	0	0	0	0	0
FBgn0038337	932.403	601.536	874.486	913.084	684.98	615.763	914.84	1006.1	474.142	611.878	835.781	803.379	938.239	854.112	1067.64	1009.23
FBgn0267725	5.73433	4.01693	2.14073	1.16912	0.88843	9.48654	1.09169	1.10682	3.4483	2.50428	1.20952	5.08468	7.56034	9.99936	5.3583	3.99301
FBgn0041188	1787.97	1025.32	2365.5	2374.49	1350.41	1491.97	2275.09	2401.79	1527.6	1534.29	2513.39	2506.75	2086.65	1274.09	2405.88	2351.88
FBgn0267571	6.8812	1.00423	1.07036	0	2.66529	0.862413	0	0	0	0	0	0	0	1.66656	0	0
FBgn0262367	0	0	0	0	0	0	0	0	0	0	0	0	0	0	0	0
FBgn0262429	0	0	0	0	0	0	0	0	0	0	0	0	0	0	0	0
FBgn0262397	0	0	0	0	0	0	0	0	0	0	0	0	0	0	0	0
FBgn0038339	10.3218	8.03387	2.14073	5.84561	14.2149	8.62413	12.0086	21.0295	7.75868	9.18234	3.62857	6.35585	7.56034	18.3322	16.0749	8.98428
FBgn0000047	48957.4	28044.2	45768.7	52075	75862.2	85255.6	88679.4	100661	55531.5	59575.9	64109.6	80428.2	116553	99102.8	110058	114114	Act88F
FBgn0038341	1322.34	782.298	1383.98	1529.21	1007.48	946.93	1371.17	1487.56	809.489	1235.44	1536.09	1461.85	1551.38	1162.43	1564.62	1514.35
FBgn0038342	4.58747	8.03387	9.63326	4.67649	7.99587	7.76172	4.36678	6.6409	0.862076	4.17379	2.41905	1.27117	2.2681	7.49952	9.37703	1.99651
FBgn0019940	266.073	295.245	286.857	240.839	287.851	285.459	245.631	280.024	273.278	316.374	293.914	249.149	371.213	358.31	368.383	286.499
FBgn0038343	48.1684	59.2498	23.548	39.7501	55.0827	40.5334	19.6505	21.0295	40.5176	51.755	32.6571	36.8639	39.3138	50.8301	70.9975	35.9371
FBgn0038344	656.008	320.351	1143.15	1270.84	482.418	451.042	1148.46	1320.43	481.9	473.308	1087.36	1273.71	717.477	417.473	914.93	1133.02
FBgn0038345	0	0	0	0	0.88843	0	0	0	0	0	0	0	0	0	0	0
FBgn0264776	1136.54	1800.59	983.663	902.562	1476.57	1385.9	914.84	1029.34	1400.01	1465.84	908.352	1000.41	1641.35	2066.53	1027.45	946.344
FBgn0264775	50.4621	55.2328	42.8145	16.3677	66.6323	53.4696	43.6678	40.9522	65.5178	79.3021	36.2857	47.0333	86.944	65.8291	50.9039	36.9354
FBgn0051296	1.14687	1.00423	1.07036	4.67649	2.66529	2.58724	8.73356	3.32045	5.17245	0.834759	2.41905	3.81351	3.02414	3.33312	4.01873	2.99476
FBgn0267408	3094.25	2277.6	6812.86	5393.16	2762.13	2771.8	4562.19	5342.6	2769.85	1680.37	4172.86	4905.45	3898.87	3603.94	4810.42	8262.54
FBgn0038348	4.58747	12.0508	4.28145	7.01473	4.44215	4.31207	12.0086	7.74771	25.0002	10.0171	13.3048	13.9829	9.82845	10.8326	17.4145	20.9633
FBgn0038349	2496.73	2023.53	3488.31	3495.67	2092.25	2220.71	3177.92	3318.23	2333.64	2207.94	3458.03	3380.04	2596.98	2213.19	3292.68	3503.87
FBgn0038350	21.7905	16.0677	28.8998	42.0884	24.8761	20.6979	33.8425	12.175	13.7932	21.7037	22.9809	26.6946	22.681	27.4982	37.5081	18.9668
FBgn0263040	1.14687	11.0466	3.21109	3.50737	0	5.17448	3.27508	3.32045	1.72415	0	0	0	8.31638	7.49952	1.33958	8.98428
FBgn0263041	0	5.02117	1.07036	1.16912	1.77686	3.44965	1.09169	1.10682	0	0.834759	3.62857	1.27117	2.2681	3.33312	1.33958	4.99126
FBgn0053207	72.2526	55.2328	88.8401	78.3312	46.1984	56.9193	69.8684	83.0112	58.6212	75.1283	94.3428	95.3378	92.9922	63.3293	70.9975	58.8969
FBgn0264431	0	0	0	0	0	0	0	0	0	0	0	0	0	0	0	0
FBgn0051446	318.829	390.647	246.183	234.994	396.24	358.764	248.906	242.393	310.347	399.015	276.981	249.149	362.896	549.965	354.987	285.5
FBgn0038353	3690.62	4111.33	3624.25	3606.74	3898.43	3820.49	3199.76	3342.58	3912.96	4935.09	3853.54	3617.75	5614.31	4829.69	4563.93	3442.97
FBgn0267195	2.29373	0	0	0	0.88843	0.862413	0	0	0	0.834759	0	0	0	0	4.01873	0
FBgn0267196	0	0	0	0	1.77686	0	0	0	0	0	0	0	0	0	0	0
FBgn0038354	135.33	108.457	123.092	118.081	127.046	149.197	129.912	121.75	109.484	109.353	118.533	139.829	166.328	216.653	132.618	123.783
FBgn0051294	0	0	0	0	0	0	0	0	0	0	0	0	0	0	0	0
FBgn0085303	0	0	0	0	0	0	0	0	0	0	0	0	0	0	0	0
FBgn0038355	0	0	0	0	0	0	0	0	0.862076	0	0	0	0	0	0	0
FBgn0038356	0	0	0	0	0	0	0	0	0	0	0	0	0	0	0	0
FBgn0038357	0	0	0	0	0	0	0	0	0	0	0	0	0	0	0	0
FBgn0266733	0	0	0	0	0	0	0	0	0	0	0	0	0	0	0	0
FBgn0038358	12.6155	9.0381	9.63326	7.01473	10.6612	9.48654	10.9169	3.32045	10.3449	5.84331	9.67619	6.35585	6.80431	8.3328	18.7541	9.98253
FBgn0266734	0	0	0	0	0	0	0	0	0	0	0	0	0	0	0	0
FBgn0038359	0	0	0	0	0	0	0	0	0.862076	0	0	0	0	0	0	0
FBgn0038360	703.029	826.484	637.936	623.142	732.955	682.169	656.108	645.274	725.868	730.414	670.076	667.364	633.557	713.288	584.055	660.843
FBgn0038361	2.29373	7.02964	4.28145	4.67649	0	0.862413	1.09169	0	2.58623	3.33903	0	0	5.29224	1.66656	2.67915	0.998253
FBgn0000246	709.91	903.81	512.704	627.819	814.691	795.145	602.615	572.224	934.49	774.656	647.095	545.332	480.082	503.301	388.477	435.238
FBgn0038363	333.738	520.193	247.254	234.994	420.228	370.838	265.282	246.82	443.107	394.006	269.724	294.911	289.561	392.475	231.747	244.572
FBgn0262527	1914.12	1186	2455.41	2438.79	1470.35	1623.92	2507.62	2332.06	1665.53	1619.43	2519.44	2617.34	1966.45	1353.25	2417.93	2154.23
FBgn0038365	22.9373	21.0889	24.6183	25.7207	26.6529	23.2852	9.82525	17.7091	13.7932	26.7123	25.4	17.7964	19.6569	26.665	9.37703	20.9633
FBgn0267551	16.0561	7.02964	11.774	9.35298	6.21901	6.8993	10.9169	16.6022	7.75868	10.8519	15.7238	8.89819	9.07241	12.4992	18.7541	16.9703
FBgn0026616	621.602	392.655	772.802	819.555	509.071	513.998	826.413	734.926	476.728	490.003	758.371	842.786	613.9	431.639	645.675	818.567
FBgn0266738	0	0	0	0	0	0	0	0	0	0	0	0	0	0.83328	0	0
FBgn0003227	99.7774	82.3472	117.74	146.14	90.6199	104.352	127.728	150.527	116.38	91.8234	114.905	116.948	83.1638	48.3303	111.185	114.799
FBgn0038366	94.0431	57.2413	83.4883	79.5003	91.5083	66.4058	81.8771	86.3317	61.2074	65.9459	102.81	48.3045	120.965	85.8279	117.883	79.8602
FBgn0263023	1.14687	1.00423	0	0	0.88843	1.72483	0	0	0	0	0	0	0	0.83328	0	0
FBgn0263022	0	0	0	2.33824	1.77686	0	0	2.21363	0	0	1.20952	1.27117	0.756034	1.66656	0	0
FBgn0038369	366.997	418.765	385.331	445.435	377.583	387.223	411.569	426.124	402.589	393.171	368.905	406.774	398.43	370.81	354.987	443.224
FBgn0017567	3678	3958.69	3692.75	4008.92	3268.54	3352.2	3386.44	3631.46	3525.89	3695.48	3998.68	4098.25	3963.13	3963.91	4462.13	4153.73
FBgn0263525	0	0	0	0	0	0	0	0	0	0	0	0	0	0	0	0
FBgn0003483	728.26	576.43	1083.21	1222.9	690.31	684.756	1362.43	1232.99	683.626	692.85	1196.22	1257.19	659.262	406.641	886.799	1151.98
FBgn0038371	32.1123	63.2667	42.8145	66.64	45.31	42.2582	43.6678	40.9522	54.3108	52.5898	39.9143	44.491	37.0457	49.9968	37.5081	44.9214
FBgn0265048	1086.08	539.273	1145.29	1128.2	701.86	748.575	917.023	1482.03	618.108	657.79	829.733	959.733	1375.23	858.279	945.74	1095.08
FBgn0038373	11.4687	10.0423	6.42218	5.84561	8.8843	7.76172	10.9169	7.74771	4.31038	8.34759	7.25714	7.62702	3.78017	7.49952	1.33958	7.98602
FBgn0038376	1761.59	1398.9	2332.32	2277.45	1465.02	1497.15	2135.35	2094.1	1489.67	1473.35	2166.26	2164.8	1801.63	1349.08	2150.02	2157.22
FBgn0051183	411.725	217.919	498.789	579.885	348.265	295.808	444.32	535.699	169.829	419.049	595.086	504.655	549.637	459.137	590.753	600.948
FBgn0038377	0	0	0	0	0	0.862413	0	0	0	0	0	0	0	0.83328	1.33958	0
FBgn0038380	14.9093	5.02117	6.42218	9.35298	7.10744	10.349	14.192	11.0682	1.72415	12.5214	10.8857	6.35585	18.1448	8.3328	8.03745	12.9773
FBgn0027657	2836.2	4216.78	2680.19	2526.47	3551.94	3284.07	2599.32	2601.02	3419.85	3085.27	2304.14	2748.27	2981.8	4242.23	2306.75	3159.47
FBgn0051292	0	1.00423	0	0	0	0.862413	2.18339	0	0	0.834759	0	0	0	0	0	0
FBgn0038381	513.796	570.405	681.821	634.833	519.732	540.733	704.143	679.585	636.212	609.374	591.457	719.482	527.712	488.302	673.806	610.931
FBgn0266566	88.3087	78.3302	75.9957	77.1621	79.9587	92.2782	87.3356	83.0112	53.4487	82.6411	96.7619	97.8801	97.5284	72.4954	93.7703	74.869
FBgn0038385	197.261	127.538	155.203	162.508	159.029	161.271	173.579	148.313	93.1042	146.918	154.819	151.269	199.593	187.488	180.843	185.675
FBgn0267692	0	1.00423	0	0	0	0.862413	0	0	0	0.834759	0	0	0	0	0	0
FBgn0085305	0	3.0127	1.07036	2.33824	0	0.862413	0	2.21363	0	1.66952	2.41905	1.27117	2.2681	2.49984	0	3.99301
FBgn0038386	0	0	0	0	0	0	0	0	0	0	1.20952	0	0	0	2.67915	0
FBgn0038387	412.872	551.324	345.727	367.104	497.521	476.052	363.534	317.656	537.073	505.864	322.943	325.42	375.749	444.972	342.931	348.39
FBgn0013334	4212.44	3150.28	2703.74	2667.94	3443.56	3627.31	2745.61	2456.03	3305.2	3383.28	2877.46	2575.39	3822.51	3707.26	2665.76	2578.49
FBgn0051088	0	0	0	2.33824	0	0	0	0	0	0	1.20952	0	0	0	1.33958	1.99651
FBgn0038388	979.424	1202.07	922.653	895.547	1141.63	1065.94	1020.73	937.473	1393.98	1163.65	961.571	950.835	948.823	1149.09	916.27	955.328
FBgn0038389	270.661	447.888	207.65	208.104	373.141	326.855	244.54	251.247	412.934	335.573	263.676	246.607	232.859	330.812	261.217	253.556
FBgn0052856	119.274	295.245	81.3476	109.897	185.682	167.308	73.1435	110.682	221.553	195.334	105.229	99.1513	119.453	189.155	119.222	93.8358
FBgn0038390	232.814	212.898	392.823	382.303	270.971	255.274	507.638	401.774	323.278	251.262	435.428	416.944	242.687	177.489	352.308	457.2
FBgn0002783	2026.51	1437.06	2771.17	2630.52	2071.82	2285.39	2956.31	2917.57	2410.36	2172.88	2917.37	3080.05	2020.12	1613.23	2500.99	2731.22
FBgn0022787	1320.04	777.277	1859.22	1796.94	1074.11	1178.06	1880.99	1863.88	1149.15	1081.85	1765.9	1937.26	1399.42	954.939	1555.25	1667.08
FBgn0003507	931.256	804.391	946.201	1046.36	1010.15	971.077	1081.87	1145.55	977.594	958.303	1047.45	927.954	1050.13	1112.43	1032.81	1166.96
FBgn0264982	0	1.00423	4.28145	4.67649	1.77686	1.72483	0	1.10682	0	0	1.20952	3.81351	0.756034	0	0	2.99476
FBgn0262028	130.743	57.2413	50.307	54.9487	86.1778	88.8285	67.6851	54.234	31.8968	50.9203	59.2667	59.745	49.1422	58.3296	44.206	41.9266
FBgn0038391	371.585	196.83	333.953	280.589	172.356	164.721	234.714	203.654	154.312	313.869	356.809	329.233	281.245	188.321	333.554	282.506
FBgn0003117	76.8401	28.1185	57.7996	53.7796	57.748	57.7817	56.7681	78.5839	50.0004	68.4502	59.2667	58.4738	80.8957	78.3283	83.0537	78.862
FBgn0038394	0	0	0	0	0.88843	0.862413	0	0	0.862076	0	0	0	0.756034	0	0	1.99651
FBgn0038395	775.282	1474.21	655.062	802.018	1383.29	683.894	1263.09	964.037	2107.78	1269.67	769.257	1151.68	1171.85	1538.24	811.783	1442.48
FBgn0024222	401.403	381.609	356.431	376.457	412.232	381.187	400.652	401.774	356.037	404.023	353.181	382.622	453.621	415.807	395.175	363.364
FBgn0266739	1.14687	1.00423	1.07036	0	0	3.44965	1.09169	1.10682	0	3.33903	1.20952	1.27117	0.756034	0.83328	0	0
FBgn0038396	141.065	239.008	143.429	164.846	203.451	185.419	146.287	130.604	218.967	232.898	154.819	151.269	158.011	189.155	123.241	135.762
FBgn0027948	4586.32	3013.71	6615.91	6805.46	3706.53	4088.7	6822	7083.62	4886.25	4244.75	7737.32	7920.66	4766.04	3124.8	5923.6	6543.55
FBgn0038397	193.82	79.3345	146.64	111.067	127.934	145.748	138.645	128.391	122.415	130.222	165.705	162.71	171.62	140.824	196.918	145.745
FBgn0026059	4391.35	2127.97	4202.24	4100.11	3143.27	3166.78	3705.21	3898.21	2971.58	3420.01	4487.33	4552.06	4515.79	3596.44	4487.58	4204.64
FBgn0052855	17.203	12.0508	14.9851	14.0295	18.657	24.1476	18.5588	17.7091	15.5174	15.0257	13.3048	21.6099	23.4371	21.6653	9.37703	14.9738
FBgn0038398	112.393	105.445	124.162	105.221	90.6199	68.1306	86.2439	79.6908	98.2766	91.8234	156.029	158.896	145.915	141.658	119.222	151.734
FBgn0010379	2001.28	1413.96	1820.69	1801.62	1839.94	2014.6	2078.59	2026.58	1928.46	1727.12	1969.1	1872.43	2081.36	1600.73	1832.54	1845.77
FBgn0003319	24.0842	13.055	11.774	10.5221	16.8802	25.8724	14.192	12.175	15.5174	19.1994	7.25714	11.4405	23.4371	31.6646	9.37703	15.972
FBgn0038400	4431.49	7713.52	3699.17	3845.24	5660.19	5521.17	3566.57	3531.85	6569.88	6334.15	3962.4	4114.78	4681.36	6518.75	4411.22	3923.13
FBgn0038401	586.049	524.21	580.137	586.899	539.277	516.585	623.358	592.147	670.695	574.314	651.933	704.228	552.661	436.639	522.434	612.927
FBgn0038402	17.203	9.0381	13.9147	3.50737	6.21901	17.2483	8.73356	3.32045	12.9311	16.6952	15.7238	13.9829	18.1448	8.3328	9.37703	7.98602
FBgn0063649	668.623	388.638	498.789	536.627	437.996	469.153	536.022	391.813	429.314	537.585	610.809	512.282	605.584	452.471	499.662	451.21
FBgn0263449	0	0	0	0	0	0	0	0	0	0	0	0	0	0	0	0
FBgn0038404	202.995	118.5	262.239	231.486	142.149	137.124	177.946	154.954	109.484	108.519	180.219	244.065	161.791	159.157	195.578	201.647
FBgn0038405	698.442	480.024	570.503	529.612	648.554	596.79	527.288	639.74	395.693	483.325	390.676	526.264	699.332	652.458	515.737	486.149
FBgn0024491	361.263	800.374	323.25	358.92	517.067	452.767	344.975	323.19	562.073	530.072	293.914	303.81	302.414	426.639	242.463	286.499
FBgn0086370	1386.56	1575.64	960.115	894.378	1470.35	1322.94	901.74	851.142	1704.32	1550.15	937.381	850.413	1127.25	1342.41	884.12	957.324
FBgn0038407	941.578	954.022	1076.78	1080.27	854.67	840.853	1055.67	1009.42	906.042	911.556	1048.66	1151.68	957.896	954.106	1032.81	1116.05
FBgn0051287	4.58747	8.03387	5.35181	7.01473	4.44215	7.76172	3.27508	3.32045	4.31038	6.67807	6.04762	7.62702	2.2681	12.4992	4.01873	1.99651
FBgn0010438	860.15	1779.5	688.243	668.738	1321.1	1237.56	645.191	743.78	1570.7	1435.78	677.333	649.568	721.257	939.107	636.298	623.908
FBgn0267199	2.29373	1.00423	3.21109	2.33824	0.88843	0.862413	0	0	0	3.33903	0	3.81351	3.02414	2.49984	6.69788	1.99651
FBgn0267200	11.4687	5.02117	1.07036	4.67649	4.44215	8.62413	1.09169	5.53408	11.207	13.3561	1.20952	7.62702	3.02414	7.49952	4.01873	1.99651
FBgn0267198	1.14687	0	0	0	0	0	0	1.10682	0.862076	0	0	0	0	0	1.33958	0
FBgn0267197	0	1.00423	0	0	0	0	0	0	0	0	0	0	0	0	0	0
FBgn0267202	1.14687	0	0	0	0	0	0	0	0	0	0	0	0	0.83328	0	0
FBgn0267201	0	0	2.14073	0	0	0.862413	0	0	0.862076	0	0	0	1.51207	0.83328	1.33958	0
FBgn0267203	0	1.00423	1.07036	0	0	0	0	0	0	0	0	1.27117	0	0	1.33958	0
FBgn0040071	317.682	175.741	409.949	521.428	211.446	253.549	394.102	368.57	231.898	282.983	417.286	428.384	357.604	222.486	475.549	310.457
FBgn0040237	1345.27	1376.8	1341.16	1496.48	1457.91	1409.18	1342.78	1658.01	1156.91	1306.4	1213.15	1357.61	1332.89	1176.59	1334.22	1322.68
FBgn0020407	228.226	263.109	272.942	282.928	283.409	264.761	323.142	256.781	310.347	256.271	250.371	303.81	228.322	246.651	269.255	273.521
FBgn0020399	0	0	0	1.16912	0	0	1.09169	1.10682	1.72415	0.834759	0	0	0.756034	0.83328	1.33958	0.998253
FBgn0261286	748.904	477.011	995.437	1102.48	553.492	545.907	1019.64	1172.12	525.866	532.576	989.39	1177.1	661.53	389.142	890.818	1029.2
FBgn0250823	3230.72	2459.37	3241.06	3182.35	2804.77	3046.91	3364.6	3132.29	3304.34	3137.02	3708.4	3488.09	3227.51	2684.83	2963.14	3217.37
FBgn0038412	277.542	251.058	296.49	300.464	269.194	328.579	241.264	262.315	172.415	233.732	244.324	236.438	260.832	309.147	269.255	218.617
FBgn0040271	916.346	658.777	1118.53	1066.24	755.166	770.997	1045.84	1023.8	773.282	812.22	1145.42	1113.54	1007.04	734.12	1014.06	998.253
FBgn0011858	0	0	0	0	0	0	0	0	0	0	0	0	0	0	0	0
FBgn0012011	0	0	0	0	0	0	0	0	0	0	0	0	0	0	0	0
FBgn0264836	0	0	0	0	0	0	0	0	0	0	0	0	0	0	0	0
FBgn0038414	94.0431	86.3641	67.4328	71.3164	92.3968	88.8285	84.0605	95.1862	59.4832	107.684	87.0857	86.4396	94.5043	135.825	100.468	103.818
FBgn0038415	55.0496	52.2201	49.2367	49.1031	43.5331	50.8824	69.8684	46.4863	40.5176	58.4331	58.0571	57.2027	66.531	63.3293	44.206	72.8725
FBgn0038416	161.708	150.635	156.273	153.155	140.372	145.748	128.82	138.352	143.967	181.143	160.867	174.15	204.129	161.656	211.653	140.754
FBgn0040284	2455.44	3739.77	1924.51	2119.62	3260.54	3110.72	2151.73	1945.78	3676.75	3702.99	2015.07	2077.09	2231.81	2836.49	1678.49	1785.87
FBgn0038418	204.142	127.538	299.702	293.45	146.591	148.335	301.308	284.452	151.725	163.613	341.086	324.148	167.84	119.992	258.538	329.423
FBgn0038419	184.646	124.525	137.006	114.574	136.818	139.711	98.2525	100.72	199.14	197.838	158.448	123.303	232.859	208.32	113.864	113.801
FBgn0027095	1594.14	2860.06	1304.77	1386.58	2120.68	2015.46	1387.54	1441.07	2275.88	2214.61	1181.7	1339.81	1496.19	2052.37	1249.82	1309.71
FBgn0038420	994.333	1274.37	622.951	658.216	980.827	927.956	644.1	617.603	894.835	1027.59	672.495	591.094	902.705	1294.92	713.994	686.798
FBgn0038421	126.155	171.724	35.322	36.2428	133.265	130.224	43.6678	44.2726	137.932	140.239	41.1238	27.9657	95.2603	151.657	44.206	21.9616
FBgn0259917	0	0	0	0	0	0	0	0	0	0	0	0	0	0	0	0
FBgn0038422	317.682	188.796	330.742	308.648	246.095	281.147	337.334	312.122	161.208	243.75	312.057	291.098	339.459	282.482	361.685	322.436
FBgn0038423	3.4406	3.0127	2.14073	0	0.88843	0.862413	2.18339	0	0	0	1.20952	1.27117	0.756034	0.83328	1.33958	0.998253
FBgn0266703	1.14687	0	0	1.16912	0	0	1.09169	1.10682	0	0.834759	0	0	0.756034	0.83328	1.33958	0.998253
FBgn0003513	79.1338	44.1863	50.307	54.9487	55.9711	69.8555	60.0432	52.0204	40.5176	57.5983	56.8476	41.9486	63.5069	76.6618	60.2809	60.8934
FBgn0267190	0	0	0	0	0	0	0	0	0	0	0	0	0	0	0	0
FBgn0051497	0	0	0	0	0	0	0	0	0	0	0	0	0	0	0	0
FBgn0267191	0	5.02117	1.07036	2.33824	8.8843	5.17448	3.27508	0	2.58623	0.834759	1.20952	0	0.756034	2.49984	1.33958	1.99651
FBgn0051279	16.0561	45.1905	6.42218	11.6912	34.6488	27.5972	19.6505	19.9227	30.1727	30.8861	13.3048	17.7964	15.1207	23.3318	16.0749	18.9668
FBgn0051282	0	0	0	0	0	0	0	0	0	0	0	0	0	0	0	0
FBgn0038424	591.783	649.739	571.574	571.701	564.153	591.615	618.991	631.992	624.143	616.052	591.457	527.536	550.393	612.461	647.015	688.794
FBgn0038425	254.604	322.359	210.861	218.626	283.409	264.761	233.623	241.286	337.934	323.052	238.276	240.251	233.615	227.485	214.332	262.54
FBgn0038426	346.354	648.735	271.872	245.516	485.083	437.243	243.448	303.268	499.142	454.109	239.486	263.132	279.733	496.635	234.426	290.492
FBgn0038427	1239.76	930.925	1410.74	1475.43	1072.34	1015.06	1405.01	1488.67	1001.73	1005.88	1513.11	1610.57	1255.77	1042.43	1503	1497.38
FBgn0038428	927.815	1529.45	572.644	630.157	1246.47	1220.31	673.575	682.906	1477.6	1364.83	649.514	678.805	736.377	1203.26	592.092	746.693
FBgn0038429	342.913	361.524	385.331	364.766	385.579	344.103	385.368	326.511	429.314	359.781	366.486	418.215	282.001	282.482	329.536	393.312
FBgn0044826	1395.74	934.942	1843.16	1678.86	998.596	1153.05	1847.15	1713.35	1137.08	1117.74	1811.87	1785.99	1564.99	971.605	1434.69	1689.04
FBgn0038431	38.9935	45.1905	73.855	44.4266	33.7604	26.7348	25.109	25.4568	31.0347	41.7379	30.2381	55.9315	46.1181	52.4967	53.583	46.9179
FBgn0038432	618.161	645.722	546.955	569.362	619.236	679.582	600.432	553.408	742.247	701.197	574.524	639.399	580.634	616.627	507.699	559.022
FBgn0250754	894.556	461.947	1617.32	1752.51	686.757	717.528	1973.78	1867.2	837.076	750.448	1964.27	2155.9	1025.18	505.801	1507.02	2064.39
FBgn0027053	748.904	964.064	824.179	833.584	842.232	898.634	862.439	893.201	977.594	964.981	815.219	855.497	657.75	741.619	701.938	799.6
FBgn0038435	4.58747	1.00423	1.07036	3.50737	5.33058	5.17448	4.36678	7.74771	4.31038	1.66952	8.46666	2.54234	4.53621	4.1664	6.69788	0.998253
FBgn0267693	29.8185	14.0593	20.3369	23.3824	18.657	25.01	22.9256	27.6704	18.1036	12.5214	25.4	19.0676	19.6569	24.1651	32.1498	20.9633
FBgn0038436	14.9093	9.0381	9.63326	15.1986	15.9917	11.2114	10.9169	6.6409	7.75868	5.00855	8.46666	5.08468	12.8526	5.83296	4.01873	8.98428
FBgn0004087	415.166	914.857	316.827	312.156	595.248	576.954	355.892	309.909	691.385	660.294	331.409	345.758	319.047	531.633	301.404	352.383
FBgn0038437	236.255	641.705	201.228	233.824	415.785	404.472	210.697	193.693	491.383	436.579	229.809	219.912	227.566	424.973	200.936	203.644
FBgn0038438	664.036	613.587	830.601	835.922	650.331	611.451	890.823	916.444	658.626	635.251	880.533	949.564	692.527	639.959	778.293	891.44
FBgn0038439	16.0561	10.0423	21.4073	14.0295	13.3265	6.03689	8.73356	15.4954	7.75868	14.1909	2.41905	7.62702	9.07241	8.3328	24.1124	6.98777
FBgn0038440	2.29373	1.00423	4.28145	2.33824	0	0.862413	3.27508	2.21363	3.4483	6.67807	2.41905	0	3.02414	4.99968	2.67915	0.998253
FBgn0028381	573.433	563.375	510.563	494.539	555.269	564.881	409.385	413.949	562.935	658.625	483.809	500.841	720.501	767.451	555.924	543.05
FBgn0259244	447.278	337.422	345.727	286.435	393.575	389.811	301.308	271.17	375.865	428.231	349.552	352.114	437.744	459.137	322.838	270.527
FBgn0267694	0	0	0	0	0	0	0	0	0	0	0	0	0	0	0	0
FBgn0038445	0	0	0	0	0	0	0	0	0	0	0	0	0	0	0	0
FBgn0038446	228.226	481.028	174.469	140.295	325.166	337.204	187.771	137.245	380.175	371.468	166.914	155.083	174.644	329.146	150.032	144.747
FBgn0020907	1205.36	1580.66	1067.15	1094.3	1279.34	1245.32	1005.45	960.716	1154.32	1182.85	843.038	948.293	1359.35	1716.56	996.644	1048.17
FBgn0038447	9.17493	4.01693	6.42218	4.67649	9.77273	8.62413	8.73356	8.85453	5.17245	14.1909	14.5143	16.5252	9.82845	11.6659	25.4519	14.9738
FBgn0027562	817.716	690.913	846.657	855.797	532.17	569.193	710.693	618.71	516.383	550.941	794.657	549.145	771.911	679.123	835.895	728.725
FBgn0027109	71.1057	118.5	50.307	45.5958	86.1778	58.6441	63.3183	50.9135	102.587	80.9716	77.4095	50.8468	93.7483	100.827	72.3371	45.9196
FBgn0038448	1.14687	0	1.07036	0	0	0	1.09169	2.21363	0.862076	0	0	0	0.756034	0	0	0
FBgn0022344	1500.1	2482.47	1135.65	1215.89	1746.65	1640.31	1097.15	1159.94	1940.53	1975.04	1224.04	1344.9	1453.1	1988.21	1294.03	1331.67
FBgn0038449	892.262	655.765	777.083	729.532	710.744	629.562	604.799	587.719	587.936	540.924	630.162	654.653	603.315	623.294	549.226	602.945
FBgn0038450	2894.69	2457.36	2617.04	2554.53	2613.76	2743.34	2718.32	2471.52	1269.84	2095.24	2088.85	2205.48	2979.53	2871.48	2807.75	2649.36
FBgn0262233	0	0	0	0	0	0	0	0	0	0	0	0	0	0	0	0
FBgn0038451	3.4406	4.01693	5.35181	4.67649	0	1.72483	2.18339	4.42726	0.862076	1.66952	3.62857	1.27117	3.02414	4.99968	0	2.99476
FBgn0038452	5.73433	8.03387	13.9147	4.67649	6.21901	9.48654	8.73356	15.4954	7.75868	10.0171	13.3048	7.62702	12.0965	10.8326	10.7166	3.99301
FBgn0262742	10003	6231.27	9328.21	8936.77	7806.64	8091.16	9020.67	8552.37	7515.58	7698.98	9189.96	8950.31	9858.69	8044.49	9066.25	8470.18
FBgn0015520	274.101	168.711	253.676	252.53	271.86	227.677	363.534	314.336	191.381	210.359	281.819	264.403	207.153	127.492	235.765	309.458
FBgn0038453	938.137	1311.53	798.491	782.143	1221.59	1248.77	831.871	796.908	1540.53	1349.8	868.438	854.226	844.49	1052.43	755.521	796.606
FBgn0038454	173.177	140.593	144.499	126.265	185.682	137.986	165.938	149.42	192.243	155.265	172.962	162.71	132.306	129.992	121.901	128.775
FBgn0015019	4932.67	7076.83	4936.51	5202.59	6551.29	6442.23	4974.85	5784.22	7769.89	7238.19	4699	5555.01	4558.13	4864.69	4637.61	4858.5
FBgn0015351	77.9869	83.3514	113.458	127.434	127.046	136.261	173.579	252.354	75.8627	81.8063	134.257	124.575	159.523	192.488	167.447	165.71
FBgn0038455	129.596	191.809	155.203	167.184	241.653	217.328	274.015	301.054	171.553	154.43	162.076	172.879	222.274	269.983	217.011	199.651
FBgn0051217	821.157	633.671	759.957	752.915	759.608	722.702	682.309	793.587	718.971	677.824	726.924	677.534	849.783	848.279	802.406	758.672
FBgn0003944	191.527	132.559	130.584	122.758	157.252	190.593	135.37	135.032	135.346	164.447	140.305	99.1513	240.419	238.318	136.637	164.712
FBgn0020556	0	2.00847	0	1.16912	0	0	0	0	1.72415	0	0	0	0	0	0	1.99651
FBgn0063261	0	0	0	0	0	0	0	0	0	0	0	0	0	0	0	0
FBgn0266250	0	1.00423	0	0	0.88843	0	0	0	0	0	0	0	0	0	0	0
FBgn0015230	0	0	0	0	0	0	0	0	0	0	0	0	0	0	0	0
FBgn0267314	0	0	0	0	0	0	0	0	0	0	0	0	0	0	0	0
FBgn0267315	1.14687	0	0	0	0	0	0	0	0	0.834759	0	0	0	0	0	0
FBgn0000014	426.634	190.804	358.571	342.553	278.079	238.026	284.932	348.647	162.932	224.55	343.505	315.25	337.947	267.483	274.613	337.409
FBgn0264857	17.203	26.1101	12.8444	5.84561	22.2108	22.4227	18.5588	13.2818	9.48283	20.869	10.8857	7.62702	17.3888	14.1658	10.7166	9.98253
FBgn0020546	2.29373	0	4.28145	3.50737	0	2.58724	2.18339	3.32045	0.862076	0.834759	4.83809	0	2.2681	1.66656	1.33958	0.998253
FBgn0262290	0	0	0	0	0	0	0	0	0	0	0	0	0	0	0	0
FBgn0262462	0	0	0	0	0	0	0	0	0	0	0	0	0	0	0	0
FBgn0263595	0	0	2.14073	0	0.88843	0	0	0	0	0	0	0	0.756034	0	0	0
FBgn0000015	212.17	98.4149	115.599	146.14	159.917	118.151	120.086	125.07	89.6559	126.883	133.048	109.321	162.547	145.824	123.241	144.747
FBgn0038458	0	0	0	0	0	0	0	0	0	0	0	0	0	0	0	0
FBgn0015008	0	0	0	0	1.77686	0	0	0	4.31038	1.66952	0	0	0.756034	0	0	0.998253
FBgn0015011	362.41	353.49	348.938	296.957	313.616	313.918	314.408	277.811	332.761	297.174	344.714	315.25	384.065	394.142	328.196	289.493
FBgn0038460	395.669	652.752	306.124	353.075	422.004	355.314	260.915	288.879	402.589	495.012	344.714	306.352	326.607	434.139	282.65	280.509
FBgn0267152	0	0	0	0	0	0	0	0	0	0	0	1.27117	0	0.83328	0	0
FBgn0043069	8.02807	9.0381	5.35181	2.33824	7.99587	11.2114	1.09169	11.0682	4.31038	5.84331	12.0952	3.81351	5.29224	9.16608	10.7166	8.98428
FBgn0038461	504.621	847.573	434.567	448.943	651.22	581.266	419.211	447.154	675.005	657.79	390.676	439.825	452.109	589.129	371.062	414.275
FBgn0266748	2.29373	2.00847	2.14073	0	2.66529	0	1.09169	0	1.72415	1.66952	2.41905	0	0.756034	3.33312	2.67915	1.99651
FBgn0266740	0	2.00847	4.28145	8.18385	0.88843	0.862413	0	5.53408	3.4483	1.66952	3.62857	5.08468	4.53621	1.66656	2.67915	1.99651
FBgn0051274	0	6.0254	0	1.16912	3.55372	2.58724	0	2.21363	3.4483	2.50428	3.62857	3.81351	2.2681	5.83296	0	0.998253
FBgn0038462	483.978	728.069	402.456	412.7	526.839	569.193	388.643	422.804	603.453	578.488	401.562	425.842	347.776	549.965	324.177	351.385
FBgn0038463	621.602	721.04	751.395	791.496	526.839	603.689	876.631	902.055	454.314	544.263	660.4	913.971	606.34	711.621	501.001	1077.11
FBgn0266917	877.353	743.133	1005.07	998.43	877.769	894.322	997.809	990.6	959.49	940.773	965.2	1097.02	813.493	658.291	960.476	924.382
FBgn0038465	2712.34	1546.52	2131.09	1796.94	1531.65	1741.21	1801.3	2898.75	1531.05	1892.4	1660.68	1674.13	3941.96	1856.55	1941.04	1774.89
FBgn0038466	611.28	468.977	746.043	750.576	485.083	526.934	565.498	623.137	582.763	650.277	768.047	762.702	738.646	729.12	873.403	708.759
FBgn0004577	564.258	371.566	607.966	592.745	549.938	479.502	586.24	587.719	274.14	345.59	431.8	541.518	629.021	565.797	472.87	600.948
FBgn0038467	1324.63	1534.47	1687.96	1867.09	1393.06	1554.93	1851.51	1807.43	1504.32	1429.11	1614.71	1874.98	1459.15	1237.42	1503	1563.26
FBgn0038468	5.73433	4.01693	1.07036	10.5221	7.99587	6.8993	5.45847	3.32045	6.89661	6.67807	0	5.08468	12.0965	4.99968	1.33958	5.98952
FBgn0051268	2.29373	0	4.28145	1.16912	0	0.862413	1.09169	1.10682	2.58623	0	0	0	3.78017	0.83328	1.33958	0
FBgn0038469	706.47	1645.94	1504.93	2068.18	1197.6	925.369	2710.68	1643.62	2312.95	1017.57	3467.7	1126.26	756.79	1486.57	1223.03	3664.59
FBgn0038470	232.814	202.855	275.083	237.332	206.116	202.667	308.95	242.393	201.726	166.117	254	230.082	163.303	159.99	179.503	250.561
FBgn0038471	427.781	639.697	346.797	353.075	562.376	572.642	395.193	397.347	624.143	591.009	416.076	380.08	374.993	503.301	332.215	402.296
FBgn0038472	228.226	351.482	189.454	169.523	332.273	288.046	198.688	161.595	368.106	301.348	157.238	158.896	220.762	285.815	184.861	214.624
FBgn0266053	924.375	603.544	1447.13	1345.66	764.939	839.128	1487.98	1545.12	880.179	766.308	1277.26	1563.54	901.949	598.295	1161.41	1384.58
FBgn0020493	736.288	410.732	785.646	750.576	454.876	472.602	629.908	592.147	427.59	506.698	787.4	770.329	709.916	434.139	740.785	646.868
FBgn0038473	1573.5	1700.17	1425.72	1599.36	1584.07	1650.66	1496.71	1650.26	1623.29	1571.02	1555.45	1619.47	1360.86	1127.43	1401.2	1298.73
FBgn0038474	583.755	810.417	537.322	560.009	682.315	787.383	551.306	534.592	718.971	668.642	566.057	531.349	567.782	602.462	527.793	519.091
FBgn0038475	295.892	223.944	367.134	319.17	238.099	239.751	307.858	293.306	280.175	262.114	313.267	348.301	248.735	229.152	324.177	264.537
FBgn0038476	2218.04	2205.3	2523.92	2457.49	2325.02	2470.81	2804.56	2778.11	3065.54	2783.09	2682.72	3087.67	2169.06	2052.37	2230.39	2591.46
FBgn0266465	789.044	852.594	835.953	821.893	898.203	820.155	790.387	882.132	765.523	885.679	740.228	775.414	841.466	954.106	884.12	803.594
FBgn0038478	784.457	518.185	1400.03	1267.33	634.339	695.967	1670.29	1405.66	780.179	580.157	1533.68	1569.9	827.858	468.303	1091.75	1602.2
FBgn0014141	5918.98	3936.6	7587.8	8256.34	4721.12	4966.64	7040.34	7923.7	5206.08	5698.9	7717.97	7968.97	7946.68	5435.49	8521.04	8254.55
FBgn0085307	0	0	0	0	0	0	0	0	0	0	1.20952	0	0	0	0	0
FBgn0261847	0	0	0	0	0	0	0	0	0	0	0	0	0	0	0	0
FBgn0266454	1.14687	0	0	0	0	0	0	0	0.862076	0.834759	0	0	0	0	0	0
FBgn0038479	36.6997	49.2074	16.0554	10.5221	15.1033	26.7348	18.5588	22.1363	31.0347	36.7294	24.1905	16.5252	22.681	34.9978	36.1685	19.9651
FBgn0265169	0	0	0	0	0	0	1.09169	0	0.862076	0.834759	0	0	0	0.83328	0	0
FBgn0051269	38.9935	73.3091	44.9552	54.9487	62.1901	73.3051	58.9515	75.2635	68.104	80.9716	68.9428	68.6432	55.9465	72.4954	83.0537	59.8952
FBgn0051265	256.898	340.435	220.495	232.655	244.318	228.539	218.339	206.975	253.45	249.593	261.257	221.184	260.076	365.81	297.386	205.64
FBgn0038481	667.476	1037.37	485.945	509.737	676.096	678.719	411.569	474.824	693.971	783.004	495.905	451.265	663.798	1014.1	618.884	516.097
FBgn0038482	241.989	276.164	143.429	111.067	214.112	225.09	136.462	151.634	214.657	255.436	198.362	179.235	225.298	349.978	225.049	185.675
FBgn0051266	341.766	519.189	329.672	307.479	352.707	367.388	283.841	323.19	362.934	373.972	339.876	252.963	396.918	529.966	363.025	320.439
FBgn0051267	240.842	426.799	234.409	245.516	257.645	222.503	197.597	211.402	275.002	318.878	283.029	230.082	266.124	344.978	350.969	232.593
FBgn0038484	309.654	400.689	183.032	209.273	357.149	253.549	223.797	200.334	722.42	620.226	316.895	266.946	496.715	805.782	310.781	246.568
FBgn0038485	0	1.00423	0	4.67649	4.44215	0.862413	1.09169	1.10682	1.72415	0.834759	1.20952	5.08468	5.29224	3.33312	1.33958	5.98952
FBgn0038486	0	0	0	0	0	0	0	0	0	0	0	1.27117	0	0	0	0
FBgn0038487	1.14687	0	1.07036	2.33824	0.88843	0.862413	1.09169	0	0	2.50428	0	1.27117	2.2681	0	1.33958	0.998253
FBgn0038488	657.155	547.307	847.727	844.106	526.839	555.394	799.12	897.628	630.177	645.268	830.943	964.818	715.965	544.132	868.045	826.553
FBgn0264291	138.771	249.05	156.273	129.773	155.475	182.832	170.304	153.847	279.313	178.638	163.286	180.506	99.7965	155.823	176.824	164.712
FBgn0038490	80.2807	114.483	75.9957	60.7943	128.822	113.839	77.5103	77.4771	120.691	100.171	77.4095	87.7107	71.0672	74.1619	64.2996	65.8847
FBgn0038491	341.766	462.952	219.424	285.266	407.79	404.472	246.723	233.538	455.176	448.265	255.209	259.319	291.073	324.979	215.672	267.532
FBgn0038492	3.4406	1.00423	3.21109	1.16912	4.44215	0.862413	3.27508	4.42726	6.03453	0	2.41905	11.4405	3.78017	1.66656	1.33958	0.998253
FBgn0051262	504.621	648.735	502	409.193	564.153	559.706	444.32	447.154	746.558	665.303	478.971	537.705	383.309	375.809	341.592	398.303
FBgn0038494	104.365	70.2964	73.855	67.8091	77.2934	80.2044	67.6851	57.5544	76.7247	60.9374	53.219	64.8297	74.8474	79.1616	69.6579	56.9004
FBgn0265199	0	0	0	0	0	0	0	0	0	0	0	0	0	0	0	0
FBgn0265197	1.14687	1.00423	0	0	0	0.862413	0	1.10682	0	0	0	0	0	0.83328	0	0
FBgn0265198	0	0	0	0	0	0	0	0	0	0	0	0	0	0	0	0
FBgn0051418	0	0	0	0	0	0	0	0	0	0	0	0	0	0	0	0
FBgn0051419	0	0	0	0	0	0	0	0	0	0	0	0	0	0	0	0
FBgn0263500	0	0	0	0	0	0	0	0	0	0	0	0	0	0	0	0
FBgn0263501	0	0	0	0	0	0	0	0	0	0	0	0	0	0	0	0
FBgn0038498	192.674	155.656	156.273	139.126	147.479	178.52	153.929	129.497	127.587	136.9	169.333	144.913	168.596	189.988	170.126	124.782
FBgn0265196	0	0	0	0	0	0	0	0	0	0	0	0	0	0	0	0
FBgn0038499	419.753	350.478	426.004	433.744	370.475	397.572	481.437	524.631	338.796	372.302	478.971	514.824	409.771	320.813	454.116	448.216
FBgn0262871	1107.87	681.875	1383.98	1351.51	787.149	838.266	1162.65	1234.1	751.73	815.559	1274.84	1385.58	1050.13	735.786	1228.39	1287.75
FBgn0262825	286.717	401.693	200.158	148.478	345.599	334.616	148.47	129.497	237.071	267.123	160.867	137.286	207.153	343.311	191.559	127.776
FBgn0265043	0	2.00847	1.07036	0	0	1.72483	0	0	0.862076	0	0	0	0	0	0	0
FBgn0028992	712.204	949.001	709.65	738.885	752.501	812.393	767.461	670.731	922.421	717.058	697.895	654.653	583.659	721.621	638.977	783.628
FBgn0025456	1169.8	1553.55	1278.01	1367.87	1224.26	1160.81	1131	1241.85	1304.32	1193.7	1181.7	1188.54	1247.46	1512.4	1101.13	1369.6
FBgn0038504	753.491	574.422	892.682	799.679	597.914	658.884	887.548	910.91	669.833	617.721	965.2	948.293	839.954	534.133	914.93	846.518
FBgn0085308	0	0	0	0	0	0	0	0	0	0	0	0	0	0	0	0
FBgn0085309	0	0	0	0	0	0	0	0	0.862076	0	0	0	0	0	0	0
FBgn0262005	0	3.0127	1.07036	0	0	0	0	0	0	0.834759	1.20952	0	0	0	0	0
FBgn0262006	0	0	0	0	0	0.862413	0	0	0	0	0	0	0	0	0	0
FBgn0261932	1.14687	0	0	1.16912	0	0	0	0	0	0	0	0	0	0	0	0
FBgn0038505	0	0	0	0	0	0	1.09169	0	0	0	0	0	0	0	0	0
FBgn0038506	1.14687	1.00423	0	1.16912	0	0	0	0	0	0.834759	0	0	0	1.66656	1.33958	0.998253
FBgn0038507	1.14687	0	1.07036	0	0.88843	0.862413	0	0	0.862076	0	0	1.27117	0	0	0	0
FBgn0262003	229.373	147.622	68.5032	88.8533	86.1778	63.8186	53.493	63.0885	52.5866	75.1283	42.3333	76.2702	50.6543	144.157	41.5268	85.8497
FBgn0262004	86.015	159.673	52.4478	47.934	90.6199	87.1037	67.6851	48.6999	118.966	86.8149	66.5238	67.372	52.9224	95.8272	56.2622	78.862
FBgn0038508	2.29373	0	3.21109	1.16912	1.77686	1.72483	3.27508	1.10682	0.862076	0.834759	1.20952	1.27117	1.51207	0	0	0.998253
FBgn0053333	0	0	0	0	0	0	0	0	0	0	0	0	0	0	0	0
FBgn0267701	0	0	0	0	0	0	0	0	0	0	0	0	0	0	0	0
[truncated: 15,560 more rows]
